# Supplementary material
Source: publisher figshare collection journal article supplement (https://springernature.figshare.com/articles/dataset/_/22677616)
Supplement: Supplementary file 1 [file 1]

## Sheet: Figure 2b
PVDF	PVDF 0 vol%			2.1 vol%				4.3 vol%				9.3 vol%				12.0 vol%				14.9 vol%				21.4 vol%
Electric field	Strain	SD		Electric field	Strain	SD		Electric field	Strain	SD		Electric field	Strain	SD		Electric field	Strain	SD		Electric field	Strain	SD		Electric field	Strain	SD
MV m-1	%			MV m-1	%			MV m-1	%			MV m-1	%			MV m-1	%			MV m-1	%			MV m-1	%
10	-0.007	0.0014		10	-0.02	0.0018		10	-0.02	0.0014		10	-0.01	0.0023		10	-0.009	0.0023		10	0.02	0.0011		10	0.024	0.0022
20	-0.008	0.0014		20	-0.031	0.0016		20	-0.031	0.0024		20	-0.014	0.0015		20	-0.011	0.0017		15	0.024	0.0015		15	0.031	0.0023
30	-0.01	0.0015		40	-0.055	0.0021		40	-0.067	0.0033		40	-0.019	0.0024		40	0.021	0.0018		20	0.03	0.0029		20	0.069	0.0014
40	-0.014	0.0017		60	-0.101	0.0026		60	-0.123	0.0054		60	-0.024	0.0036		60	0.197	0.0109		25	0.191	0.0163		25	0.278	0.0056
50	-0.017	0.0027		80	-0.16	0.0021		80	-0.206	0.0043		80	-0.041	0.002		80	0.545	0.0356		30	0.659	0.1621
60	-0.023	0.0024		100	-0.249	0.0021		100	-0.305	0.006		90	0.052	0.0018						35	2.941	0.3315
70	-0.029	0.0025		120	-0.364	0.0056														40	8.091	0.315
80	-0.035	0.0034																		45	8.533	0.251
90	-0.043	0.0037
100	-0.053	0.0042
110	-0.064	0.0045
120	-0.079	0.0033
130	-0.096	0.0047
140	-0.115	0.0057

## Sheet: Figure 2c
25 MV m-1			30 MV m-1			35 MV m-1			40 MV m-1			45 MV m-1
Electric field	Strain		Electric field	Strain		Electric field	Strain		Electric field	Strain		Electric field	Strain
MV m-1	%		MV m-1	%		MV m-1	%		MV m-1	%		MV m-1	%
27572.2	5.38971e-06		29486	-8.35499e-07		29486	6.69403e-06		27572.2	-2.55661e-06		29486	0
25658.4	0.00042514		29486	-8.35499e-07		25658.4	-0.000588608		31399.9	-2.55661e-06		25658.4	-0.000813668
129005	0.00294		146230	-0.0012		167282	-0.00238		184506	0.00244		205558	-0.00204
220869	0.00379		266801	-0.00199		301250	-0.00238		343354	0.00293		387372	-0.00204
320388	0.00547		383544	-0.0028		439045	-0.00416		502201	0.00293		555789	-0.00204
419907	0.00588		502201	-0.0044		580668	-0.00297		653394	0.00146		739516	-0.00285
517512	0.0084		617031	-0.0044		712722	-0.00238		812242	-2.55661e-06		907933	-0.00162
617031	0.00966		731861	-0.00399		850518	-0.00238		974917	-0.00147		1084010	-0.00244
716550	0.01134		852432	-0.00359		992141	-0.00118		1126110	-0.00147		1269650	-0.00162
808414	0.01176		973003	-0.0028		1124200	-0.000588608		1284960	-0.00196		1439980	-0.00162
909847	0.01176		1085920	-0.0028		1263910	-0.000588608		1438060	-0.000980462		1617960	-0.00285
1007450	0.0126		1204580	-0.0012		1399790	0.0018		1595000	-2.55661e-06		1794040	-0.00204
1103140	0.01176		1321320	-0.0024		1533750	0.00298		1753850	-2.55661e-06		1962450	-0.00285
1206490	0.01049		1436150	-0.0028		1679210	0.00119		1908870	0.00146		2148090	-0.00285
1298350	0.00883		1558630	-0.00479		1813170	0.00298		2063890	0.00146		2316510	-0.00366
1395960	0.00756		1671550	-0.00639		1947140	0.000601996		2222730	-2.55661e-06		2492580	-0.00366
1503130	0.00547		1792120	-0.00679		2088760	-0.000588608		2377750	0.000485757		2674400	-0.00448
1595000	0.00462		1906950	-0.00959		2218910	-0.00297		2534690	-0.000980462		2844730	-0.00448
1698340	0.00504		2017950	-0.00998		2358610	-0.00356		2691620	-0.000980462		3022710	-0.00652
1794040	0.00547		2146180	-0.01038		2500240	-0.00535		2844730	-0.00245		3202610	-0.0057
1887810	0.00672		2259100	-0.00959		2632290	-0.00476		3009320	-0.00147		3374860	-0.0057
1989250	0.00715		2379670	-0.00919		2773920	-0.00297		3162420	-0.00245		3554760	-0.00407
2083020	0.00924		2496410	-0.00719		2907880	-0.00178		3317440	-0.000492148		3736570	-0.00326
2182540	0.01008		2611240	-0.00559		3041850	6.69403e-06		3474380	-2.55661e-06		3899250	-0.00162
2282060	0.01008		2729900	-0.00479		3183470	6.69403e-06		3625570	0.000975349		4082970	-0.00122
2375840	0.00966		2846640	-0.00359		3315530	0.00119		3788240	0.000485757		4257130	-0.00204
2471530	0.00966		2961470	-0.0032		3451410	0.000601996		3945180	0.000975349		4429380	-0.00285
2574880	0.00883		3083960	-0.0032		3594950	0.000601996		4096370	-0.000492148		4615020	-0.0053
2668650	0.00547		3202610	-0.00359		3728920	6.69403e-06		4255220	-0.00245		4783430	-0.00652
2772000	0.00379		3313610	-0.0044		3866710	-0.00238		4414070	-0.00294		4959510	-0.00855
2865780	0.00211		3438010	-0.00639		4004510	-0.00356		4567170	-0.00538		5139410	-0.00978
2965300	0.00084489		3549020	-0.00719		4136560	-0.00178		4727930	-0.00685		5309740	-0.01059
3060990	0.00084489		3671500	-0.00878		4280100	-0.000588608		4881040	-0.00733		5489640	-0.01018
3158590	0.00126		3790160	-0.00919		4412150	0.000601996		5041800	-0.0088		5665710	-0.00896
3260030	0.00168		3901160	-0.01119		4546120	0.000601996		5196820	-0.00978		5837950	-0.00692
3359550	0.00336		4023640	-0.01198		4689660	0.00119		5348010	-0.0093		6019770	-0.0057
3453320	0.0042		4138470	-0.01158		4819800	0.00239		5508770	-0.0093		6190100	-0.0053
3550930	0.00462		4255220	-0.01079		4961420	0.0018		5663800	-0.00831		6371910	-0.00611
3648530	0.0063		4375790	-0.00959		5099220	-0.000588608		5818810	-0.00782		6549900	-0.0057
3744230	0.0063		4488700	-0.00919		5233180	-0.00416		5979580	-0.00782		6716400	-0.00774
3847570	0.00547		4609280	-0.00679		5374810	-0.00773		6134600	-0.00636		6898210	-0.0114
3941350	0.00462		4727930	-0.00399		5504950	-0.00952		6285790	-0.00538		7072370	-0.01303
4040870	0.00504		4842760	-0.00399		5640830	-0.0113		6452290	-0.0044		7246530	-0.01507
4142300	0.0042		4963330	-0.0032		5782450	-0.0113		6603480	-0.00245		7430260	-0.01833
4234170	0.00379		5080080	-0.0032		5916420	-0.01071		6762330	-0.00196		7600590	-0.02036
4335600	0.00379		5194910	-0.00479		6056130	-0.00892		6917350	-0.00196		7780490	-0.02158
4433200	0.00336		5313560	-0.00559		6192010	-0.00654		7068540	-0.00245		7960390	-0.02199
4528890	0.00379		5428390	-0.00839		6325980	-0.00356		7231220	-0.00391		8124980	-0.02158
4634160	0.00252		5545140	-0.00998		6471430	-0.00118		7388150	-0.00587		8310620	-0.02158
4722190	0.00126		5663800	-0.00998		6605400	-0.00178		7541260	-0.00733		8486690	-0.02036
4819800	0.00042514		5776710	-0.01119		6739370	-0.00178		7702020	-0.00978		8657020	-0.01873
4925060	5.38971e-06		5899200	-0.01119		6877160	-0.00238		7857040	-0.01076		8835010	-0.01833
5013090	0.00042514		6017850	-0.00959		7011130	-0.00297		8010150	-0.01076		9007250	-0.01629
5116440	0.00084489		6128850	-0.00959		7150840	-0.00476		8170910	-0.01222		9187150	-0.01629
5214050	0.00084489		6253250	-0.00878		7294380	-0.00833		8324020	-0.00978		9368970	-0.01507
5307820	0.00126		6368080	-0.00719		7422600	-0.0113		8484780	-0.01124		9535470	-0.01507
5409260	0.00252		6484830	-0.00679		7566140	-0.01309		8639800	-0.01027		9713450	-0.0171
5506860	0.00168		6605400	-0.00679		7698190	-0.01309		8790990	-0.01173		9891440	-0.01873
5604470	0.00084489		6716400	-0.00839		7832160	-0.01428		8953670	-0.01076		10063700	-0.02199
5703990	5.38971e-06		6840800	-0.00919		7975700	-0.01487		9104860	-0.01124		10247400	-0.02443
5792020	0.00084489		6957540	-0.00959		8107750	-0.01309		9265620	-0.01321		10417700	-0.02688
5899200	0.00042514		7066630	-0.01038		8247460	-0.0119		9422550	-0.01418		10591900	-0.02769
5992970	5.38971e-06		7191030	-0.00878		8385260	-0.0113		9573750	-0.01321		10773700	-0.02769
6092490	5.38971e-06		7307770	-0.00878		8519230	-0.00952		9730680	-0.01418		10942100	-0.02769
6192010	0.00126		7420690	-0.00719		8655110	-0.00833		9893350	-0.01271		11120100	-0.02688
6289620	0.00168		7545090	-0.00599		8798650	-0.00594		10048400	-0.01271		11303900	-0.02443
6383390	0.00211		7661830	-0.00399		8926870	-0.00594		10207200	-0.01124		11474200	-0.0224
6486740	0.00126		7776660	-0.00479		9072320	-0.00535		10356500	-0.01076		11652200	-0.0224
6580520	0.00042514		7895320	-0.00519		9208200	-0.00594		10515400	-0.01271		11830200	-0.02077
6680040	-0.00125		8008230	-0.00559		9338340	-0.00833		10674200	-0.01418		12004300	-0.02118
6779560	-0.00251		8130720	-0.00639		9478050	-0.00892		10829200	-0.01564		12184200	-0.02077
6875250	-0.00419		8247460	-0.00719		9612020	-0.0113		10982300	-0.01613		12356500	-0.02158
6972850	-0.00378		8362290	-0.00919		9749820	-0.01368		11143100	-0.01663		12528700	-0.02281
7068540	-0.00293		8482860	-0.01038		9893350	-0.01309		11301900	-0.01809		12710500	-0.02321
7173810	-0.00293		8595780	-0.00919		10019700	-0.01309		11455000	-0.01711		12882800	-0.02484
7273320	5.38971e-06		8712520	-0.00998		10165100	-0.01428		11610100	-0.01663		13056900	-0.02362
7367100	0.00252		8836920	-0.00919		10301000	-0.0119		11767000	-0.01515		13233000	-0.02403
7462790	0.00547		8949840	-0.00959		10435000	-0.0125		11931600	-0.01515		13409100	-0.02403
7568050	0.00588		9070410	-0.00878		10574700	-0.0113		12080900	-0.01222		13590900	-0.02484
7659920	0.0063		9183320	-0.00719		10712500	-0.01071		12237800	-0.01222		13759300	-0.02443
7761350	0.00715		9298150	-0.00679		10844500	-0.01309		12396600	-0.01173		13937300	-0.02525
7857040	0.00798		9418730	-0.00519		10988100	-0.01368		12547800	-0.01124		14119100	-0.02565
7948910	0.00588		9535470	-0.00399		11120100	-0.01428		12708600	-0.01173		14287500	-0.02647
8054170	0.00462		9652210	-0.00479		11263700	-0.01547		12869400	-0.01076		14475100	-0.0281
8149860	0.00336		9772780	-0.0028		11401500	-0.01547		13016700	-0.01076		14647300	-0.02851
8245550	0.00084489		9889530	-0.0028		11529700	-0.01368		13177500	-0.01271		14819600	-0.02973
8346980	0.00042514		10006300	-0.0032		11675100	-0.0119		13332500	-0.01321		14999500	-0.02932
8442670	5.38971e-06		10123000	-0.00519		11809100	-0.01071		13489400	-0.01515		15173600	-0.02973
8540280	-0.00167		10239800	-0.00519		11943100	-0.01071		13648300	-0.01564		15345900	-0.02932
8641710	-0.00167		10358400	-0.00839		12086600	-0.00892		13803300	-0.0176		15529600	-0.0281
8731660	-0.00251		10477100	-0.00919		12216700	-0.00773		13958300	-0.02102		15699900	-0.0281
8835010	-0.0021		10591900	-0.00998		12358400	-0.00892		14117200	-0.022		15874100	-0.02729
8934530	-0.0021		10712500	-0.00959		12492300	-0.0113		14268400	-0.02298		16057800	-0.02729
9026390	-0.00041436		10827300	-0.00919		12626300	-0.0119		14429100	-0.02298		16226200	-0.02647
9127820	5.38971e-06		10942100	-0.00998		12767900	-0.01368		14584200	-0.02151		16406100	-0.02565
9223520	0.00084489		11064600	-0.00839		12905700	-0.01607		14743000	-0.02004		16586000	-0.02647
9317290	0.00084489		11179500	-0.00759		13035900	-0.01725		14899900	-0.01809		16754400	-0.02729
9422550	0.00211		11300000	-0.00799		13171700	-0.01786		15053000	-0.01663		16934300	-0.02769
9514420	0.00168		11418700	-0.00679		13311500	-0.01666		15211900	-0.01564		17106600	-0.02851
9615850	0.00168		11527800	-0.00759		13447300	-0.01607		15374600	-0.01613		17280700	-0.02973
9715370	0.00168		11652200	-0.00719		13590900	-0.01487		15521900	-0.01515		17466400	-0.03217
9807230	0.00084489		11767000	-0.00839		13722900	-0.01368		15680800	-0.01663		17632900	-0.03299
9908670	0.00042514		11883700	-0.00998		13856900	-0.01368		15839600	-0.01906		17816600	-0.03461
10008200	-0.00041436		12006200	-0.01158		13998500	-0.01487		15987000	-0.02151		17992700	-0.03381
10103900	-0.00083411		12119100	-0.01158		14130600	-0.0113		16153500	-0.022		18163000	-0.03381
10205300	-0.00083411		12235900	-0.01238		14272200	-0.01071		16308500	-0.022		18346700	-0.03177
10297200	-0.00041436		12358400	-0.01158		14408100	-0.00892		16461600	-0.02102		18520900	-0.02891
10396700	-0.00041436		12471300	-0.01158		14544000	-0.00892		16622400	-0.02054		18691200	-0.02484
10498100	5.38971e-06		12591900	-0.01079		14679800	-0.00892		16775500	-0.0176		18875000	-0.02199
10588100	-0.00125		12710500	-0.01038		14817600	-0.01071		16932400	-0.01467		19045300	-0.01792
10687600	-0.00125		12821500	-0.01119		14957300	-0.01309		17091300	-0.01369		19223300	-0.01588
10785200	-0.00167		12947800	-0.01158		15093200	-0.01428		17244400	-0.01271		19403200	-0.01384
10886600	-0.00378		13055000	-0.00959		15225300	-0.01666		17407000	-0.01222		19573500	-0.01303
10986200	-0.00629		13171700	-0.01038		15372600	-0.01786		17562100	-0.01027		19753400	-0.01344
11079900	-0.00503		13296100	-0.01119		15504700	-0.01904		17713300	-0.01124		19929500	-0.01262
11177500	-0.00335		13405200	-0.01079		15642500	-0.01845		17874000	-0.01124		20103600	-0.01181
11280900	-0.00293		13531500	-0.01198		15782200	-0.01845		18029000	-0.01271		20281600	-0.01059
11370800	-0.00125		13646400	-0.01278		15912300	-0.01487		18187900	-0.01321		20453900	-0.00855
11478000	0.00042514		13759300	-0.01158		16054000	-0.0113		18346700	-0.01321		20629900	-0.00488
11573700	0.00336		13881800	-0.01079		16193700	-0.00833		18494100	-0.01321		20813700	-0.00162
11667500	0.00504		13994700	-0.00998		16325700	-0.00654		18656800	-0.01467		20980200	0.00366
11768900	0.00504		14117200	-0.00998		16463500	-0.00238		18813700	-0.01467		21160100	0.00896
11864600	0.00462		14233900	-0.00839		16603200	-0.00178		18966800	-0.01467		21340000	0.01466
11958400	0.0042		14350700	-0.00639		16735300	-0.00297		19127600	-0.01467		21512200	0.01914
12059800	0.00336		14467400	-0.00599		16876900	-0.00416		19278800	-0.01418		21694000	0.02362
12155500	0.00168		14582200	-0.00559		17009000	-0.00476		19433800	-0.01369		21866300	0.0281
12255000	-0.00167		14700900	-0.00559		17144900	-0.00833		19598400	-0.01321		22036600	0.03381
12358400	-0.0021		14821500	-0.00639		17288400	-0.00892		19751500	-0.01173		22220300	0.03869
12446400	-0.0021		14936300	-0.00719		17418500	-0.01012		19908400	-0.01076		22383000	0.04399
12549800	-0.0021		15051100	-0.00799		17560200	-0.00892		20067300	-0.0088		22568600	0.04969
12647400	-0.00083411		15175500	-0.00878		17699900	-0.00773		20222300	-0.00685		22752400	0.05539
12741100	0.00042514		15286500	-0.00959		17826200	-0.00654		20377300	-0.00245		22917000	0.06394
12846400	0.00252		15405200	-0.00998		17971600	-0.00594		20536200	0.000485757		23096900	0.07046
12944000	0.00504		15527700	-0.01079		18107500	-0.00297		20689300	0.00342		23274800	0.07575
13039700	0.00504		15638700	-0.00998		18241500	-0.00356		20853900	0.01173		23449000	0.08268
13141100	0.00547		15761200	-0.00919		18386900	-0.00297		20999300	0.01808		23627000	0.09
13233000	0.00672		15874100	-0.00878		18520900	-0.00178		21160100	0.02297		23797300	0.09733
13334400	0.0063		15990800	-0.00599		18654900	-0.00356		21313200	0.02933		23977200	0.10303
13432000	0.00588		16115200	-0.00359		18796500	-0.00118		21466300	0.0352		24155200	0.10955
13525800	0.00462		16224300	-0.00199		18928500	-0.000588608		21630900	0.04154		24325500	0.11607
13627200	0.00379		16346800	-0.00199		19070200	0.00358		21785900	0.04888		24509300	0.12177
13726800	0.00168		16467400	-0.00199		19206000	0.00596		21939000	0.05327		24687300	0.13032
13822400	-0.00041436		16578400	-0.0032		19340000	0.00834		22097800	0.05914		24857600	0.13806
13922000	-0.00167		16698900	-0.00559		19475900	0.01132		22256700	0.06403		25033700	0.1462
14013800	-0.00335		16815700	-0.00799		19611800	0.01429		22409800	0.06696		25204000	0.15394
14115300	-0.00378		16928600	-0.00919		19751500	0.01727		22570600	0.07038		25382000	0.1629
14214800	-0.00335		17051100	-0.00959		19889300	0.02085		22721800	0.07674		25563800	0.17104
14308600	-0.00335		17167800	-0.00959		20025200	0.02262		22878700	0.0826		25734100	0.18082
14411900	-0.00335		17284600	-0.01038		20164900	0.0256		23041400	0.09043		25914000	0.191
14505700	-0.00251		17403200	-0.00878		20298800	0.03036		23188700	0.09825		26093900	0.20119
14603300	-0.0021		17516100	-0.00878		20434700	0.03215		23351400	0.10802		26262300	0.21136
14706600	-0.00083411		17634800	-0.00719		20574400	0.03454		23506400	0.11829		26444100	0.22154
14798500	0.00126		17755400	-0.00679		20708400	0.03751		23661400	0.12758		26622100	0.2305
14896100	0.00126		17868300	-0.00519		20848100	0.03929		23826000	0.13686		26790600	0.2411
14999500	0.00126		17994600	-0.0032		20985900	0.04406		23975300	0.14567		26974300	0.2476
15093200	0.00168		18105600	-0.000799573		21116000	0.04644		24130300	0.15201		27146500	0.25494
15192700	0.00042514		18222300	0.000398533		21257700	0.05298		24296800	0.16033		27326400	0.26267
15290400	0.00042514		18342900	0.00199		21395500	0.05954		24446100	0.16815		27504400	0.27123
15386000	0.00126		18455800	0.00359		21531300	0.06787		24601100	0.17352		27670900	0.27978
15489400	0.00168		18578300	0.00519		21669100	0.07739		24756200	0.18183		27852700	0.28874
15583200	0.00042514		18697000	0.00519		21805000	0.08751		24911200	0.19015		28028800	0.30055
15676900	0.00168		18809900	0.00559		21937100	0.09585		25075800	0.19894		28201000	0.31276
15778400	0.00294		18932400	0.00598		22082500	0.10597		25227000	0.20823		28380900	0.32498
15874100	0.00504		19047200	0.00639		22216500	0.1143		25383900	0.21605		28551300	0.33557
15977400	0.00336		19163900	0.00559		22350500	0.12085		25542700	0.22632		28729300	0.34616
16071200	0.00252		19286400	0.00559		22488300	0.12681		25695800	0.23756		28909200	0.35757
16168800	0.00168		19399300	0.00639		22620300	0.13156		25858500	0.24881		29079500	0.36937
16268300	0.00126		19516100	0.00679		22765800	0.13454		26015500	0.26005		29261300	0.37956
16364000	0.00084489		19636700	0.00878		22901700	0.14228		26160900	0.27226		29437400	0.39218
16459700	0.00042514		19749600	0.01078		23033700	0.14645		26323600	0.28644		29609600	0.40766
16563100	0.00084489		19870100	0.01358		23177200	0.15419		26482400	0.30159		29789500	0.42354
16656800	0.00168		19985000	0.01397		23309300	0.16668		26637400	0.31332		29963700	0.43983
16756300	0.00294		20099800	0.01557		23449000	0.17502		26794400	0.32408		30134000	0.45531
16855900	0.00504		20224200	0.01797		23586800	0.18335		26949400	0.33581		30319700	0.47648
16947700	0.00588		20339000	0.01957		23718900	0.19168		27110200	0.34607		30493800	0.50132
17049200	0.0063		20451900	0.02196		23858600	0.20121		27267100	0.35438		30671800	0.52453
17144900	0.00672		20576300	0.02476		23996400	0.21134		27416400	0.36416		30851700	0.54856
17240500	0.00672		20687400	0.02636		24128400	0.21729		27577100	0.37638		31018200	0.57788
17345800	0.00588		20807900	0.02835		24270000	0.22503		27734100	0.38762		31201900	0.61006
17437700	0.00547		20924700	0.03035		24407800	0.23514		27889100	0.39886		31378000	0.64548
17535300	0.00504		21039500	0.03355		24543700	0.24229		28047900	0.41109		31548300	0.68011
17638600	0.0042		21163900	0.03475		24685300	0.25241		28201000	0.42527		31726300	0.71432
17732400	0.00379		21273000	0.03753		24811700	0.26074		28356100	0.43895		31896600	0.75097
17831900	0.00379		21391600	0.03913		24953300	0.26967		28518700	0.45312		32076500	0.79047
17929500	0.00379		21512200	0.03994		25096800	0.28039		28669900	0.46584		32258400	0.83038
18025200	0.00547		21630900	0.04233		25227000	0.28872		28830700	0.4805		32426800	0.86784
18124700	0.0063		21741900	0.04473		25366700	0.29825		28981900	0.49859		32610500	0.90531
18220400	0.00756		21866300	0.04712		25502500	0.30717		29136900	0.51765		32784700	0.94441
18319900	0.00924		21979200	0.04992		25634600	0.3161		29297700	0.53475		32955000	0.98676
18421400	0.01092		22099800	0.05471		25778100	0.32741		29452700	0.5548		33136800	1.02464
18513200	0.01302		22216500	0.0587		25908300	0.33872		29607700	0.57923		33314800	1.06333
18614700	0.01512		22329400	0.06389		26049900	0.34943		29768500	0.60856		33485100	1.10608
18718000	0.01721		22450000	0.06829		26191500	0.36253		29923500	0.63985		33666900	1.15251
18811800	0.01974		22564800	0.07388		26319700	0.37622		30082300	0.67064		33835400	1.1973
18911300	0.01847		22679600	0.07628		26461400	0.38873		30237400	0.70633		34017200	1.23925
19007000	0.01931		22806000	0.07947		26597300	0.40004		30392400	0.74299		34195200	1.28364
19104600	0.01721		22915000	0.08227		26735100	0.41194		30555100	0.7821		34365500	1.33129
19209900	0.01638		23039400	0.08506		26872800	0.42444		30708200	0.8168		34545400	1.3765
19299800	0.01512		23156200	0.08785		27008700	0.43814		30865100	0.85443		34721500	1.4217
19403200	0.01428		23271000	0.09105		27142700	0.45123		31023900	0.89403		34893700	1.46772
19502700	0.01344		23393500	0.09265		27286200	0.46552		31177000	0.93509		35075500	1.52026
19594600	0.01428		23508300	0.09744		27418300	0.481		31335900	0.97175		35243900	1.5789
19696000	0.01512		23625100	0.10064		27556100	0.4929		31490900	1.0089		35427700	1.64406
19789800	0.01679		23743700	0.10503		27699600	0.50541		31644000	1.05045		35605700	1.71818
19885500	0.01931		23856700	0.10902		27829800	0.51671		31801000	1.0964		35772200	1.80451
19990700	0.02142		23971500	0.11302		27967600	0.52862		31959800	1.1399		35954000	1.90063
20084500	0.02351		24095900	0.11741		28105400	0.54112		32112900	1.18145		36132000	2.00366
20184000	0.02435		24208800	0.12141		28241200	0.55184		32273700	1.22202		36300400	2.11199
20283500	0.02393		24325500	0.12459		28384800	0.56255		32428700	1.26749		36486000	2.23009
20377300	0.02561		24446100	0.12979		28514900	0.57445		32585600	1.31294		36658300	2.35308
20476800	0.02561		24560900	0.13418		28650800	0.59171		32748300	1.3584		36832400	2.483
20576300	0.02687		24685300	0.14057		28788600	0.61137		32897600	1.40484		37012300	2.62023
20668200	0.02729		24792500	0.14537		28922600	0.62922		33054500	1.4547		37178800	2.76725
20771600	0.0298		24909300	0.15095		29062300	0.64768		33217200	1.50358		37362500	2.92323
20861500	0.03065		25033700	0.15614		29198100	0.67208		33366500	1.55051		37542400	3.08694
20961000	0.03316		25144700	0.16374		29334000	0.69828		33529100	1.59596		37710900	3.26002
21064400	0.03527		25269100	0.16812		29473700	0.72387		33682300	1.64533		37890800	3.44166
21158200	0.03778		25385800	0.17332		29607700	0.74887		33835400	1.69617		38066800	3.63469
21255800	0.0403		25498700	0.17651		29745500	0.77328		33999900	1.74358		38237200	3.83832
21357200	0.04198		25623100	0.1813		29889000	0.80126		34151100	1.78758		38420900	4.04723
21447100	0.04408		25732200	0.1853		30021100	0.82924		34308100	1.83303		38587400	4.26796
21552400	0.0445		25852800	0.18929		30160800	0.85305		34466900	1.88436		38769200	4.49642
21650000	0.04786		25971400	0.19369		30298600	0.88103		34621900	1.93471		38949100	4.72938
21743800	0.04954		26088200	0.19848		30428700	0.91257		34777000	1.98457		39117500	4.96476
21843300	0.05079		26206800	0.20328		30570400	0.94651		34933900	2.03149		39299300	5.19974
21939000	0.0529		26319700	0.20766		30706200	0.97984		35088900	2.08184		39479200	5.43798
22036600	0.05499		26438400	0.21246		30842100	1.01556		35249700	2.13219		39649600	5.6693
22138000	0.05877		26559000	0.21645		30987600	1.05306		35402800	2.18156		39827600	5.89003
22228000	0.06087		26673800	0.22204		31115800	1.09711		35561600	2.22848		39997900	6.09528
22333200	0.06423		26790600	0.22684		31255500	1.13998		35720500	2.27688		40179700	6.28629
22427000	0.06717		26913000	0.23322		31395200	1.17867		35867800	2.32527		40357700	6.46343
22524600	0.07053		27027900	0.24041		31525400	1.22034		36036300	2.37366		40524200	6.62104
22626100	0.07262		27144600	0.248		31665100	1.2626		36187500	2.42449		40711800	6.75991
22723700	0.07304		27263300	0.25439		31799000	1.30785		36338600	2.48315		40884000	6.8833
22821300	0.07555		27378100	0.26038		31936800	1.3507		36499400	2.55012		41052400	6.98838
22918900	0.07555		27500600	0.26477		32078500	1.39654		36654400	2.62589		41236100	7.08083
23016500	0.07598		27619200	0.26956		32212400	1.44119		36809400	2.70752		41412200	7.16105
23114100	0.0764		27734100	0.27396		32352100	1.48524		36972100	2.79698		41584500	7.22906
23215500	0.07766		27852700	0.27795		32491800	1.5275		37123300	2.8918		41766300	7.29014
23309300	0.0785		27963700	0.28035		32622000	1.57096		37284100	2.99299		41934700	7.34635
23408800	0.07976		28082400	0.28394		32765500	1.61739		37441000	3.10101		42114600	7.39644
23504500	0.08144		28203000	0.28913		32897600	1.66323		37590300	3.22028		42296400	7.44042
23600200	0.08354		28319700	0.29553		33031500	1.70966		37753000	3.34982		42466700	7.48033
23703500	0.08857		28436400	0.30151		33177000	1.7549		37904200	3.48962		42644700	7.51902
23799200	0.09235		28553200	0.3095		33311000	1.80551		38061100	3.63675		42822700	7.55812
23894900	0.09654		28666100	0.31948		33443000	1.85491		38219900	3.79659		42989200	7.59518
23996400	0.10158		28790500	0.32827		33586600	1.90432		38376900	3.96865		43172900	7.63183
24090100	0.10704		28907200	0.33746		33718600	1.95373		38531900	4.15342		43341400	7.66849
24195400	0.11166		29022100	0.34584		33860200	2.00671		38688800	4.34405		43525100	7.7031
24291100	0.1146		29146500	0.35702		33998000	2.06207		38845800	4.54056		43703100	7.73283
24384900	0.11753		29251700	0.3682		34132000	2.11445		39006500	4.74146		43871500	7.75971
24488200	0.11964		29372300	0.37779		34267900	2.16386		39159600	4.95116		44053300	7.78781
24582000	0.12174		29494800	0.38658		34405700	2.21625		39310800	5.15988		44233200	7.81795
24679600	0.12215		29605800	0.39656		34543500	2.27399		39477300	5.37007		44401600	7.84848
24781000	0.12299		29732100	0.40974		34683200	2.32995		39626600	5.57928		44577700	7.87863
24872900	0.12593		29845000	0.42212		34819100	2.37817		39783500	5.78605		44755700	7.90998
24978200	0.12802		29961800	0.4337		34953000	2.42757		39944300	5.98548		44929800	7.93849
25024100	0.13223		30024900	0.44928		35021900	2.48175		40020900	6.17514		45019800	7.96699
24918800	0.13391		29898600	0.46724		34886100	2.53592		39865800	6.35502		44836100	7.99184
24825000	0.1402		29781900	0.48602		34748300	2.58473		39705100	6.52952		44661900	8.0175
24725500	0.14272		29667000	0.50359		34608500	2.63414		39544300	6.6967		44489700	8.04723
24626000	0.14733		29546500	0.52596		34470700	2.68712		39391200	6.85801		44307800	8.07695
24532200	0.15069		29433500	0.54832		34331000	2.73831		39232400	7.00905		44137500	8.10994
24430800	0.15447		29314900	0.57308		34193200	2.78415		39077300	7.14885		43959500	8.14659
24337000	0.15699		29194300	0.59384		34057400	2.82285		38920400	7.27692		43777700	8.18162
24237500	0.16035		29081400	0.61061		33927200	2.85618		38761600	7.38788		43611200	8.21297
24136100	0.1616		28958900	0.62778		33783700	2.88475		38612300	7.48222		43431300	8.23904
24044200	0.16413		28844100	0.64216		33647800	2.9044		38455300	7.55701		43253300	8.26226
23944700	0.16539		28727300	0.65255		33511900	2.91749		38290800	7.61958		43079200	8.27976
23843300	0.1679		28606800	0.65694		33374100	2.92702		38139600	7.67579		42903100	8.29565
23753300	0.1679		28490000	0.65774		33242100	2.93654		37982600	7.72125		42727000	8.31071
23648000	0.16958		28379000	0.65854		33100400	2.94131		37827600	7.75938		42550900	8.32497
23552400	0.17085		28252700	0.65574		32962700	2.94012		37668800	7.79701		42369100	8.34086
23458600	0.17168		28139800	0.65175		32826800	2.93654		37508000	7.83123		42196900	8.35755
23357100	0.17294		28025000	0.64775		32687100	2.93357		37353000	7.86056		42022700	8.37343
23257600	0.17168		27902500	0.64615		32551200	2.93		37201800	7.88745		41846700	8.38524
23161900	0.17168		27791500	0.64297		32417200	2.92643		37044900	7.91531		41670600	8.39664
23062400	0.17294		27670900	0.63737		32275600	2.92285		36887900	7.9417		41490700	8.40642
22968600	0.17421		27550300	0.62938		32145400	2.91749		36729100	7.96223		41320400	8.41742
22865300	0.17294		27437400	0.62419		32003800	2.91095		36572100	7.97983		41140400	8.42922
22771500	0.1721		27313000	0.6194		31864100	2.90142		36422900	7.99693		40962500	8.43981
22675800	0.17168		27203900	0.61302		31735900	2.88713		36260200	8.01502		40788300	8.45203
22574400	0.1721		27085300	0.60463		31594300	2.87642		36105200	8.02969		40612200	8.46139
22476800	0.17		26962800	0.59784		31456500	2.86749		35954000	8.04093		40434200	8.46507
22381100	0.17042		26851800	0.58905		31318700	2.85737		35793200	8.05364		40263900	8.46832
22279700	0.17085		26731200	0.58306		31182800	2.8419		35636300	8.06341		40080200	8.47484
22187800	0.16917		26614500	0.57427		31045000	2.82821		35477400	8.07026		39907900	8.48339
22084400	0.17042		26499600	0.56588		30912900	2.81927		35320500	8.07466		39733800	8.49154
21984900	0.1679		26379100	0.5575		30771300	2.81094		35167400	8.07906		39557700	8.49724
21891100	0.16707		26260400	0.54952		30639300	2.79963		35012400	8.08395		39381600	8.50253
21791600	0.16581		26143700	0.53993		30497600	2.78832		34847800	8.08591		39209400	8.50864
21695900	0.16328		26023100	0.53034		30359800	2.77641		34698500	8.08052		39023800	8.51475
21602200	0.16245		25908300	0.52235		30227800	2.7657		34535800	8.07271		38855300	8.518
21498800	0.15867		25795400	0.51317		30082300	2.74963		34384600	8.06488		38675400	8.52086
21405000	0.15615		25669000	0.50398		29952200	2.72998		34223900	8.05364		38501300	8.52371
21305500	0.15279		25563800	0.494		29816300	2.71451		34066900	8.04534		38327100	8.52615
21198300	0.1486		25433600	0.48721		29674700	2.70081		33915700	8.038		38145300	8.52778
21108400	0.14565		25322600	0.48003		29536900	2.68474		33758800	8.03458		37973100	8.52778
21003100	0.1444		25204000	0.47363		29401000	2.66628		33598000	8.03262		37795100	8.53022
20905500	0.14397		25083400	0.46645		29261300	2.64842		33444900	8.03017		37619000	8.53307
20811700	0.14356		24976200	0.45966		29129200	2.63176		33282300	8.02089		37444800	8.53307
20712200	0.14272		24851800	0.45407		28987600	2.61629		33127200	8.01014		37264900	8.529
20618500	0.14272		24733200	0.44648		28853700	2.59783		32976000	7.99987		37088900	8.52167
20522800	0.14146		24620300	0.44009		28721600	2.57937		32815300	7.9901		36916600	8.51515
20421300	0.14104		24501600	0.4349		28578100	2.56747		32662200	7.97886		36738600	8.50782
20325600	0.14063		24388700	0.4289		28446000	2.54902		32503300	7.96761		36564500	8.5013
20228000	0.13852		24270000	0.42292		28308200	2.52758		32344500	7.95832		36392200	8.49602
20126600	0.13684		24145600	0.41613		28166600	2.50674		32197100	7.94708		36208500	8.49398
20032800	0.13559		24032700	0.40974		28034500	2.48531		32030600	7.92948		36036300	8.49357
19931400	0.13391		23917900	0.40374		27892900	2.46984		31875600	7.90896		35862100	8.49276
19835700	0.1318		23793500	0.39696		27757000	2.45079		31722500	7.88842		35684100	8.48828
19740000	0.13097		23684400	0.38937		27626900	2.42996		31563600	7.86643		35511900	8.48542
19638600	0.12887		23561900	0.38138		27481400	2.41031		31406700	7.83612		35332000	8.48135
19546700	0.12845		23441400	0.37499		27347500	2.39186		31253600	7.7975		35152100	8.47321
19445300	0.12551		23330300	0.3686		27211600	2.36983		31094800	7.75547		34983700	8.46629
19345800	0.12257		23205900	0.36181		27073800	2.34304		30941600	7.70805		34801800	8.45895
19250100	0.12089		23096900	0.35583		26939800	2.31923		30782800	7.6577		34627700	8.45163
19148600	0.11921		22978200	0.35064		26798200	2.30138		30624000	7.601		34451600	8.44266
19052900	0.11753		22855700	0.34824		26656600	2.28351		30467000	7.53648		34275500	8.43126
18957200	0.11711		22742800	0.34464		26528400	2.25851		30308200	7.4656		34099500	8.42108
18857700	0.1167		22624100	0.34145		26384800	2.23232		30155100	7.38691		33921500	8.41049
18760100	0.11585		22503600	0.33665		26254700	2.20851		30000000	7.30087		33747300	8.39664
18662500	0.11417		22388700	0.33346		26118800	2.18649		29841200	7.20897		33573200	8.38157
18561100	0.11208		22268200	0.33067		25975300	2.16268		29686200	7.11268		33395200	8.36651
18467300	0.10956		22153300	0.32627		25841300	2.1347		29531200	7.00905		33219100	8.3494
18365900	0.10579		22036600	0.32228		25701600	2.10732		29366600	6.89858		33044900	8.32741
18270200	0.10368		21917900	0.31909		25565700	2.07874		29217300	6.77882		32861200	8.30379
18172600	0.10116		21801200	0.31509		25431700	2.05136		29058400	6.65271		32687100	8.28139
18073100	0.09781		21686400	0.31189		25292000	2.02278		28903400	6.5266		32511000	8.26062
17981200	0.09529		21563900	0.3083		25152300	1.996		28746500	6.39657		32338700	8.24026
17877800	0.09235		21449100	0.3051		25018300	1.9698		28585700	6.26606		32160800	8.21583
17778300	0.08984		21330400	0.30111		24878600	1.94063		28432600	6.13017		31984700	8.19139
17684600	0.08816		21211700	0.29831		24746600	1.90789		28279500	5.99184		31812400	8.16777
17586900	0.08773		21100700	0.29393		24610700	1.87515		28120700	5.85204		31636400	8.14659
17483600	0.08605		20976300	0.29034		24471000	1.84063		27963700	5.70735		31456500	8.12379
17393700	0.08354		20865300	0.28714		24335100	1.80848		27804900	5.56119		31284200	8.0969
17292200	0.08186		20748600	0.28274		24197300	1.77277		27649900	5.41504		31108200	8.06962
17194600	0.08059		20622300	0.27994		24057600	1.73764		27494800	5.26693		30926300	8.04193
17098900	0.07766		20515100	0.27675		23931300	1.70311		27334100	5.11882		30754100	8.01261
16997500	0.07766		20396400	0.27475		23787800	1.6662		27179100	4.96778		30576100	7.98451
16901800	0.07723		20277800	0.27156		23650000	1.63228		27026000	4.8182		30396200	7.95682
16806100	0.07598		20159100	0.26877		23516000	1.59656		26867100	4.66521		30224000	7.9332
16706600	0.0764		20038600	0.26597		23372500	1.56144		26714000	4.51025		30044100	7.90551
16612800	0.07598		19927600	0.26358		23236600	1.53049		26551300	4.3509		29875600	7.87414
16509500	0.07472		19808900	0.26157		23098800	1.49536		26396300	4.19106		29693800	7.84197
16411900	0.07221		19690200	0.25559		22961000	1.45964		26245100	4.02779		29515800	7.80939
16314300	0.07094		19571600	0.252		22828900	1.42571		26082400	3.86405		29343600	7.77844
16216600	0.06674		19454800	0.2492		22689200	1.39476		25927400	3.69589		29165600	7.74423
16121000	0.06255		19328500	0.2448		22553300	1.35844		25774300	3.53068		28987600	7.70758
16021400	0.06087		19223300	0.24041		22423200	1.31975		25611600	3.36742		28815400	7.66767
15920000	0.05835		19102700	0.23722		22279700	1.28344		25462400	3.20415		28635500	7.62654
15824300	0.05625		18982100	0.23282		22147600	1.24951		25305400	3.03942		28461300	7.58051
15728600	0.05541		18869200	0.22923		22004100	1.21438		25140800	2.87762		28289100	7.5288
15629100	0.05458		18746700	0.22483		21866300	1.17628		24989600	2.73049		28107300	7.47015
15531500	0.05458		18635700	0.22124		21734200	1.13819		24830800	2.59949		27933100	7.40255
15430100	0.05458		18520900	0.21885		21592600	1.10545		24675800	2.48072		27758900	7.32639
15332500	0.05415		18394600	0.21645		21458600	1.06914		24518800	2.37562		27579000	7.24047
15236800	0.05247		18283600	0.21366		21324700	1.02985		24360000	2.28421		27410600	7.14761
15137200	0.05079		18163000	0.21246		21183000	0.99413		24205000	2.20013		27230700	7.04824
15037700	0.05079		18044400	0.21086		21049100	0.96139		24053800	2.12339		27052700	6.94033
14942000	0.04954		17927600	0.21007		20913200	0.92805		23889200	2.05006		26878600	6.81937
14840600	0.04869		17809000	0.20806		20777300	0.89591		23741800	1.98506		26700600	6.6862
14748700	0.04701		17696000	0.20486		20637600	0.86793		23579100	1.92835		26528400	6.54774
14643500	0.04618		17577400	0.20367		20497900	0.83996		23422200	1.8741		26352300	6.4052
14551600	0.04366		17456800	0.20048		20360100	0.81614		23272900	1.81935		26168600	6.2533
14454000	0.0424		17342000	0.19648		20229900	0.79471		23108300	1.76998		25996300	6.09691
14350700	0.04156		17221400	0.19249		20088300	0.77269		22951400	1.72403		25816400	5.9336
14258800	0.03946		17102700	0.18809		19952400	0.75185		22802100	1.67907		25644200	5.76338
14163100	0.0382		16991700	0.1829		19818500	0.7328		22641400	1.63311		25470000	5.58459
14059800	0.03778		16871200	0.18091		19674900	0.71613		22482500	1.59157		25292000	5.40011
13967900	0.03737		16752500	0.17692		19542900	0.69946		22327500	1.55442		25112100	5.21156
13866500	0.0382		16639600	0.17332		19405100	0.68398		22172500	1.51776		24941800	5.02178
13765000	0.0382		16515200	0.17092		19267300	0.67149		22021300	1.47865		24761900	4.83078
13671300	0.03946		16406100	0.16893		19135200	0.6566		21858600	1.44296		24589600	4.63489
13569800	0.0403		16287500	0.16573		18991700	0.64411		21701700	1.40875		24411700	4.43656
13476000	0.04114		16163100	0.16453		18852000	0.63042		21544700	1.376		24233700	4.23904
13382300	0.04114		16050100	0.15495		18721800	0.62029		21389700	1.34031		24063300	4.03583
13278900	0.04114		15927700	0.15095		18576400	0.61017		21236600	1.30267		23883400	3.83058
13181300	0.03988		15812800	0.14856		18448200	0.59945		21077800	1.2665		23709300	3.62206
13083700	0.03988		15699900	0.14497		18310400	0.58934		20918900	1.22692		23537000	3.41722
12988000	0.03695		15575500	0.14018		18168800	0.5816		20765800	1.18634		23357100	3.20993
12892300	0.0361		15464500	0.13578		18036700	0.57267		20610800	1.14528		23181100	3.00387
12792800	0.0361		15343900	0.13139		17898900	0.56671		20448100	1.10618		23003100	2.7978
12695200	0.03527		15221500	0.12739		17757300	0.55779		20296900	1.06462		22825100	2.59621
12599500	0.03484		15112400	0.1242		17625200	0.55064		20134300	1.02259		22649000	2.40562
12494300	0.03484		14989900	0.1206		17485500	0.54648		19983100	0.97859		22476800	2.23131
12402400	0.03401		14871200	0.11581		17347700	0.53815		19831900	0.93656		22298800	2.0786
12304800	0.03401		14762100	0.11102		17213800	0.52921		19667300	0.89697		22120800	1.94583
12203300	0.03233		14641600	0.10742		17074000	0.52207		19514200	0.86079		21944700	1.83018
12113400	0.03065		14524800	0.10304		16943900	0.51254		19357200	0.82609		21772500	1.72225
12012000	0.02897		14408100	0.09984		16800400	0.50302		19202200	0.79187		21602200	1.62533
11914400	0.02729		14283700	0.09704		16660700	0.49231		19041500	0.76401		21418400	1.53736
11816800	0.02687		14172700	0.09345		16528600	0.48278		18888400	0.7381		21246200	1.45917
11717200	0.02729		14054000	0.09185		16388900	0.47444		18725700	0.71121		21068200	1.38913
11617700	0.02771		13931500	0.08986		16254900	0.46671		18580200	0.6902		20890200	1.31989
11523900	0.02855		13822400	0.08746		16121000	0.45957		18415600	0.67015		20714100	1.25514
11420600	0.0298		13698000	0.08467		15977400	0.45242		18256800	0.65158		20540000	1.19976
11328700	0.03316		13585100	0.08227		15843500	0.44706		18103700	0.63252		20365800	1.14925
11225400	0.03274		13466500	0.08027		15707600	0.44231		17944800	0.61541		20191700	1.10242
11125900	0.03442		13345900	0.07828		15567900	0.43635		17795600	0.59977		20013700	1.0564
11035900	0.03274		13231100	0.07628		15435800	0.42921		17629100	0.58461		19835700	1.01323
10932600	0.03274		13114300	0.07508		15294200	0.42206		17475900	0.56799		19661500	0.97373
10836900	0.03106		12993800	0.07348		15156400	0.41491		17322800	0.55529		19485500	0.93423
10739300	0.03023		12882800	0.07188		15020500	0.40599		17160200	0.54502		19307500	0.89513
10637800	0.02939		12764100	0.06948		14880800	0.39587		17005100	0.53574		19131400	0.85889
10546000	0.02812		12641600	0.06669		14746800	0.38516		16850100	0.52449		18953400	0.82468
10448400	0.02812		12528700	0.06389		14612900	0.37742		16693200	0.51374		18777300	0.78884
10346900	0.02687		12412000	0.0615		14473100	0.36848		16542000	0.50347		18601300	0.75585
10253200	0.02519		12295200	0.0575		14339200	0.35837		16387000	0.49369		18427100	0.72408
10151700	0.02561		12180400	0.05631		14199500	0.35004		16220500	0.48343		18251000	0.69477
10054100	0.02519		12056000	0.05152		14059800	0.3411		16067400	0.47414		18071100	0.66585
9958430	0.02435		11943100	0.04912		13927700	0.33217		15910400	0.46485		17900800	0.63816
9851250	0.02393		11824400	0.04832		13788000	0.32205		15757300	0.45654		17719000	0.61413
9755560	0.02393		11703800	0.04872		13654000	0.31313		15600400	0.4497		17546800	0.59336
9659870	0.02393		11590900	0.04752		13516200	0.30539		15439600	0.44335		17370700	0.57259
9560350	0.02393		11468400	0.04832		13372700	0.29705		15286500	0.43846		17190800	0.55426
9466570	0.02435		11353600	0.04793		13240600	0.28991		15131500	0.43309		17016600	0.53838
9363220	0.02435		11236900	0.04832		13106700	0.28456		14966900	0.42673		16844400	0.52495
9265620	0.0231		11120100	0.04592		12967000	0.27682		14815700	0.42086		16664500	0.51151
9173760	0.02267		11005300	0.04432		12834900	0.27026		14658800	0.41206		16490300	0.49847
9070410	0.02057		10884700	0.04193		12691400	0.26252		14501900	0.40376		16314300	0.48504
8978540	0.01806		10764200	0.04033		12553600	0.253		14348800	0.39545		16134400	0.47322
8880940	0.01638		10649300	0.03674		12421500	0.24646		14184200	0.38469		15960200	0.46101
8779510	0.01596		10528800	0.03514		12283700	0.23931		14033000	0.37345		15782200	0.44919
8685730	0.01428		10408200	0.03355		12149800	0.23216		13879900	0.3622		15611900	0.43861
8586210	0.01344		10299100	0.03315		12010100	0.22621		13717200	0.35243		15432000	0.42883
8482860	0.01344		10176600	0.03234		11870300	0.21967		13562200	0.34265		15254000	0.41947
8394830	0.0147		10057900	0.03155		11736400	0.21252		13403300	0.33386		15076000	0.41132
8289570	0.0147		9946940	0.03275		11600500	0.20836		13248300	0.32652		14901800	0.40318
8193880	0.01553		9824460	0.03275		11458900	0.20062		13097100	0.31919		14727700	0.39626
8100100	0.01553		9709630	0.03275		11326800	0.19288		12940200	0.31381		14553500	0.38811
7996750	0.01679		9592880	0.03315		11187100	0.18455		12779400	0.30746		14375500	0.37996
7902970	0.01679		9470400	0.03394		11051200	0.17502		12626300	0.30062		14195600	0.37141
7803450	0.01596		9355570	0.03355		10911500	0.1655		12467500	0.29622		14023400	0.36489
7703940	0.01596		9236910	0.03315		10773700	0.1524		12314400	0.29035		13845400	0.35757
7612070	0.01638		9124000	0.03155		10639800	0.14645		12153600	0.28204		13671300	0.34901
7508730	0.01638		9011080	0.03155		10498100	0.1405		11996700	0.27324		13499000	0.34046
7414950	0.01679		8884770	0.03075		10360300	0.13454		11847400	0.26444		13317200	0.33354
7319260	0.01679		8773770	0.02875		10232100	0.13216		11684700	0.25515		13141100	0.32784
7214000	0.01847		8651280	0.02835		10090500	0.12978		11523900	0.24538		12967000	0.32214
7122130	0.01847		8536450	0.02556		9952680	0.1262		11376600	0.23658		12792800	0.3148
7022610	0.01889		8421620	0.02396		9820630	0.12263		11213900	0.22681		12618700	0.3087
6921180	0.01806		8301050	0.02396		9679010	0.11787		11064600	0.21703		12440700	0.30258
6825490	0.01764		8182390	0.02356		9543120	0.11489		10905800	0.21018		12266500	0.29607
6725970	0.01638		8069480	0.02356		9405330	0.11013		10743100	0.20236		12094300	0.28915
6630280	0.01512		7948910	0.02277		9269450	0.10835		10591900	0.19503		11910500	0.28263
6530760	0.01344		7832160	0.02277		9137390	0.10477		10431100	0.18916		11738300	0.27611
6431240	0.01217		7717330	0.02396		8997680	0.1012		10276100	0.18477		11562200	0.27001
6335550	0.01092		7594850	0.02356		8859890	0.09763		10123000	0.17891		11382300	0.26308
6241770	0.01008		7480020	0.02396		8724010	0.09644		9960340	0.17304		11210100	0.25534
6138420	0.01049		7363270	0.02236		8580470	0.09228		9809150	0.16717		11030200	0.24964
6046560	0.00966		7242700	0.02076		8450330	0.09287		9650300	0.15983		10857900	0.24232
5945130	0.01092		7131700	0.01877		8310620	0.09228		9493360	0.15104		10674200	0.2358
5841780	0.01217		7013040	0.01837		8172820	0.09049		9336430	0.14273		10502000	0.22724
5751830	0.01134		6896300	0.01797		8038860	0.09049		9181410	0.13491		10325900	0.21869
5652310	0.01176		6775730	0.01916		7901060	0.08811		9022560	0.12807		10147900	0.21136
5554710	0.01176		6653240	0.01997		7759440	0.08751		8875200	0.11976		9971820	0.20321
5459020	0.01302		6542240	0.02076		7627380	0.08633		8710610	0.11535		9799580	0.19629
5355670	0.01344		6423580	0.02157		7489590	0.08513		8557500	0.10949		9621590	0.18897
5261890	0.01302		6306840	0.02277		7357530	0.08454		8404400	0.10411		9445520	0.18326
5164290	0.01176		6188180	0.02196		7217820	0.08215		8243630	0.09971		9269450	0.17593
5062850	0.01049		6069530	0.02157		7072370	0.07977		8084790	0.09483		9095290	0.16901
4970990	0.00966		5950870	0.01997		6944150	0.07739		7929770	0.09043		8917300	0.16168
4871470	0.0084		5837950	0.01877		6810180	0.0762		7770920	0.08554		8739320	0.15434
4770040	0.00672		5719300	0.01717		6664730	0.07263		7621640	0.08163		8568990	0.14702
4678170	0.00672		5602550	0.01597		6534590	0.06966		7458970	0.07869		8394830	0.13969
4574830	0.00672		5487720	0.01438		6391050	0.06906		7302030	0.07577		8213010	0.13277
4479140	0.0084		5361410	0.01318		6255170	0.06489		7147010	0.07429		8033110	0.12665
4385360	0.01049		5252320	0.01358		6119290	0.06311		6988160	0.07283		7860870	0.12095
4282010	0.0126		5131750	0.01358		5983400	0.06311		6835060	0.07283		7682880	0.11525
4186320	0.0147		5015010	0.01318		5847520	0.06013		6680040	0.07234		7506810	0.10955
4082970	0.01638		4904010	0.01478		5711640	0.05894		6517360	0.07234		7336480	0.10548
3987280	0.01596		4779610	0.01478		5564280	0.05834		6368080	0.07429		7156580	0.101
3891590	0.01679		4664780	0.01438		5436050	0.05775		6207320	0.07332		6982420	0.0953
3792070	0.01596		4548030	0.01478		5294430	0.05715		6048470	0.07038		6806350	0.09041
3694470	0.01385		4425550	0.01318		5162370	0.05359		5897280	0.06941		6626450	0.0847
3600690	0.01217		4316460	0.01318		5028400	0.05239		5734610	0.06794		6456120	0.08144
3495430	0.00966		4193980	0.01278		4888690	0.0512		5581500	0.06745		6272390	0.0786
3401650	0.00798		4075320	0.01158		4752810	0.0512		5428390	0.06403		6098230	0.07534
3304050	0.00715		3958570	0.01078		4618840	0.0518		5265720	0.06012		5925990	0.0733
3202610	0.00672		3838000	0.00918		4477220	0.05359		5116440	0.05719		5744180	0.07249
3110750	0.00504		3727000	0.00719		4345170	0.05536		4957590	0.05572		5571930	0.07168
3007400	0.00715		3608340	0.00479		4203540	0.05656		4798740	0.05327		5401600	0.0729
2909800	0.00715		3487770	0.0044		4065750	0.05597		4643720	0.05035		5217870	0.07127
2816020	0.00798		3374860	0.00399		3931780	0.05597		4482960	0.04936		5045630	0.07046
2716500	0.00798		3254290	0.0028		3788240	0.05536		4331770	0.04888		4867640	0.07127
2618900	0.00883		3133710	0.00359		3656190	0.05239		4178660	0.04693		4693480	0.07046
2521290	0.0084		3022710	0.00399		3522220	0.04941		4019820	0.04693		4519330	0.0676
2417940	0.00883		2904060	0.00639		3380600	0.04823		3859060	0.04693		4337510	0.06475
2326080	0.0084		2781570	0.00799		3246630	0.04465		3704040	0.0479		4165270	0.06231
2226560	0.00798		2668650	0.00998		3110750	0.04228		3543270	0.04693		3989200	0.06027
2128960	0.0084		2548080	0.01078		2967210	0.04346		3392080	0.04693		3811210	0.05701
2035180	0.01049		2435170	0.01158		2838990	0.04525		3233230	0.04545		3637050	0.05457
1931830	0.01092		2314600	0.01078		2697360	0.04644		3078210	0.0435		3460980	0.05417
1836140	0.01134		2197850	0.00998		2557650	0.04644		2925110	0.04106		3284910	0.05253
1744280	0.01217		2084940	0.00878		2423680	0.04703		2764350	0.03617		3106920	0.05091
1637100	0.01217		1962450	0.00799		2285890	0.04941		2611240	0.03372		2930850	0.05131
1549070	0.01217		1845710	0.00719		2153840	0.04941		2454310	0.03226		2758600	0.04969
1443810	0.01176		1730880	0.00758		2016040	0.04823		2291630	0.03079		2578700	0.05172
1346200	0.01176		1610310	0.00758		1870590	0.04644		2144270	0.02933		2400720	0.05172
1254340	0.01217		1495480	0.00639		1742360	0.04585		1983500	0.03079		2228470	0.05294
1150990	0.01302		1378730	0.00679		1600740	0.04287		1820830	0.03226		2050490	0.05376
1051470	0.0126		1260080	0.00679		1459120	0.03929		1667720	0.0352		1872500	0.05417
961520	0.01302		1145250	0.00639		1328980	0.03632		1512700	0.03666		1702170	0.05376
854346	0.01344		1028500	0.00598		1189270	0.03393		1355770	0.03763		1524190	0.05213
760568	0.0126		904105	0.00598		1051470	0.03275		1200750	0.03911		1346200	0.04969
664877	0.01049		791189	0.00479		917502	0.03036		1039990	0.03911		1173960	0.04765
563444	0.01008		672532	0.00559		779706	0.02798		884967	0.03763		992141	0.04602
473494	0.01008		551961	0.00479		643825	0.0262		733775	0.03617		816069	0.04317
368234	0.01092		440959	0.0044		506029	0.0268		574927	0.0347		641911	0.04153
272542	0.01134		318474	0.00598		366320	0.0268		419907	0.03324		469666	0.04113
174937	0.01302		209386	0.00758		234266	0.02938		255318	0.03324		289767	0.04073
75417.9	0.01302		86900.9	0.00878		94556.2	0.03125		102212	0.03942		115608	0.04113
-18359.7	0.01385		-35584.1	0.00959		-41325.6	0.03376		-47067.1	0.03703		-62377.7	0.04031
-117879	0.01302		-144672	0.00918		-171466	0.03501		-213570	0.03643		-236536	0.04195
-219312	0.01302		-270985	0.00839		-311175	0.03563		-362849	0.03464		-414522	0.04235
-313089	0.01176		-383901	0.00719		-448971	0.03376		-517869	0.03464		-584853	0.04195
-410694	0.00966		-498730	0.00598		-590594	0.03314		-682458	0.03166		-762839	0.04113
-512127	0.00756		-619302	0.00519		-728390	0.02876		-831736	0.03046		-944652	0.03909
-602077	0.00462		-730304	0.0028		-862358	0.02625		-994412	0.02927		-1116900	0.03829
-709251	0.00336		-850875	-8.35499e-07		-1000150	0.02438		-1151350	0.02927		-1294880	0.03747
-803029	0.00252		-971446	-0.0012		-1139860	0.02314		-1298710	0.02687		-1470960	0.03706
-900634	0.00336		-1088190	-0.0028		-1273830	0.02314		-1457560	0.02747		-1645110	0.03747
-1000150	0.00588		-1204930	-0.0028		-1413540	0.02125		-1620230	0.02807		-1821190	0.03665
-1095850	0.00672		-1325500	-0.0028		-1547510	0.02063		-1773340	0.02747		-1997260	0.03665
-1191540	0.0084		-1436510	-0.0032		-1683390	0.02251		-1932190	0.02747		-2171420	0.03706
-1292970	0.00924		-1557080	-0.0024		-1819270	0.02125		-2083380	0.02747		-2347490	0.03706
-1388660	0.01049		-1671910	-0.000799573		-1955150	0.02189		-2242230	0.02867		-2525470	0.03665
-1492010	0.01008		-1788650	-0.000799573		-2096780	0.02063		-2401080	0.02986		-2699630	0.03665
-1587700	0.00924		-1914960	0.000797902		-2234570	0.01625		-2556100	0.02867		-2877620	0.03421
-1681480	0.01008		-2025970	0.00239		-2364710	0.01501		-2709200	0.02687		-3051780	0.03299
-1784820	0.00883		-2142710	0.0028		-2504420	0.01501		-2866140	0.02867		-3229760	0.03013
-1880510	0.0084		-2261370	0.0028		-2640300	0.01501		-3019240	0.02807		-3403920	0.02851
-1976210	0.00798		-2374280	0.00199		-2776190	0.01438		-3180000	0.02986		-3579990	0.02566
-2079550	0.00756		-2498680	-0.000400204		-2917810	0.01563		-3333110	0.02807		-3759890	0.02444
-2171420	0.00798		-2613510	-0.00199		-3051780	0.01814		-3491960	0.02807		-3934050	0.02362
-2272850	0.00672		-2728340	-0.00399		-3189570	0.02001		-3652720	0.02687		-4108210	0.02484
-2370450	0.00588		-2847000	-0.00599		-3325450	0.02063		-3803910	0.02687		-4286200	0.02444
-2468060	0.0063		-2959910	-0.00719		-3461340	0.02251		-3962760	0.02388		-4458440	0.02525
-2567580	0.00547		-3078570	-0.00759		-3601050	0.02314		-4119690	0.0215		-4630680	0.02647
-2659440	0.00504		-3199140	-0.00719		-3738840	0.02125		-4274710	0.02269		-4810580	0.02607
-2755130	0.00504		-3315890	-0.00639		-3870890	0.02001		-4437390	0.02329		-4988570	0.02729
-2856570	0.00547		-3434540	-0.00399		-4012520	0.01751		-4584750	0.02388		-5168470	0.02769
-2954170	0.00588		-3555110	-0.0032		-4146490	0.01501		-4741690	0.02687		-5338800	0.02647
-3053690	0.00672		-3666120	-0.0012		-4280450	0.01251		-4902450	0.02867		-5514870	0.02647
-3151300	0.0063		-3784770	0.000398533		-4423990	0.01001		-5059380	0.03046		-5692860	0.02607
-3245070	0.00547		-3907260	0.000797902		-4556050	0.00814		-5218230	0.03166		-5865100	0.02403
-3344590	0.00547		-4014430	0.0016		-4693840	0.00938		-5375160	0.02927		-6045000	0.0224
-3440280	0.00588		-4142660	0.000797902		-4833550	0.00876		-5524440	0.02687		-6222990	0.01996
-3539800	0.0042		-4251750	0.000797902		-4965600	0.00938		-5683290	0.02568		-6393320	0.01792
-3641240	0.00379		-4372320	-0.000799573		-5109140	0.01188		-5836400	0.02031		-6573220	0.01588
-3736930	0.0042		-4490970	-0.000799573		-5245020	0.01188		-5997160	0.01552		-6749290	0.01507
-3832620	0.00462		-4605800	-0.0012		-5380900	0.01438		-6156000	0.01314		-6923450	0.01466
-3932140	0.00504		-4726380	-8.35499e-07		-5518700	0.01751		-6305280	0.01194		-7105260	0.01588
-4029740	0.00504		-4839290	0.000797902		-5648840	0.01814		-6466050	0.01134		-7273680	0.01792
-4125430	0.00588		-4952210	0.0016		-5788550	0.02063		-6624890	0.01015		-7447840	0.02077
-4226870	0.00588		-5080430	0.0016		-5928260	0.02189		-6776080	0.01134		-7627740	0.02281
-4318730	0.00588		-5189520	0.00239		-6060310	0.02063		-6934930	0.01493		-7803810	0.02444
-4420160	0.00504		-5312010	0.00199		-6201940	0.02063		-7091870	0.01612		-7981800	0.02525
-4515850	0.00504		-5430660	0.0012		-6341650	0.01814		-7244970	0.01971		-8155950	0.02444
-4613460	0.00462		-5541670	0.000398533		-6473700	0.01501		-7401910	0.0215		-8332030	0.02199
-4714890	0.00379		-5660320	-0.000799573		-6613410	0.01376		-7555010	0.0215		-8504270	0.01996
-4808670	0.00336		-5784720	-0.0012		-6749290	0.01063		-7715770	0.02269		-8680340	0.0167
-4910100	0.00294		-5893810	-0.00199		-6885170	0.00876		-7874620	0.02388		-8858330	0.01507
-5005790	0.00504		-6018210	-0.0028		-7024880	0.01001		-8025810	0.0215		-9040140	0.01262
-5103400	0.00504		-6133040	-0.0024		-7155020	0.01125		-8184660	0.02329		-9212390	0.0114
-5208660	0.00715		-6249780	-0.0012		-7298560	0.01314		-8341600	0.0215		-9388460	0.011
-5302440	0.00924		-6370350	-0.000799573		-7434440	0.01501		-8496620	0.0215		-9564530	0.01222
-5396220	0.01008		-6481360	-8.35499e-07		-7566500	0.01751		-8657380	0.02091		-9736780	0.01222
-5499560	0.01008		-6605750	0.000398533		-7710030	0.01751		-8814310	0.01792		-9916680	0.01384
-5591430	0.00883		-6718670	-8.35499e-07		-7844000	0.01751		-8961680	0.01911		-10088900	0.01426
-5689030	0.00715		-6831590	-8.35499e-07		-7974140	0.01751		-9128180	0.01732		-10266900	0.01507
-5792380	0.00547		-6954070	-0.000400204		-8117680	0.01688		-9279370	0.01732		-10444900	0.0167
-5888070	0.00336		-7068900	0.000797902		-8251650	0.01563		-9436310	0.01493		-10617100	0.01629
-5983760	0.00084489		-7187560	0.00199		-8391360	0.01563		-9595150	0.01552		-10795100	0.0167
-6085190	-0.0021		-7304300	0.0016		-8531060	0.01376		-9746350	0.01612		-10971200	0.01751
-6177060	-0.00335		-7421040	-8.35499e-07		-8663120	0.01376		-9909020	0.01732		-11149200	0.01751
-6280400	-0.00378		-7537790	-0.0012		-8799000	0.01501		-10066000	0.01792		-11323300	0.01588
-6372270	-0.00251		-7658360	-0.0028		-8940620	0.01376		-10213300	0.01732		-11499400	0.01588
-6471790	-0.00167		-7771280	-0.00359		-9074590	0.01501		-10372200	0.01612		-11673600	0.01507
-6575130	-0.00083411		-7891850	-0.0032		-9214300	0.01563		-10532900	0.01493		-11855400	0.01588
-6663170	0.00042514		-8010500	-0.0028		-9346360	0.01625		-10684100	0.01493		-12027600	0.01344
-6766520	0.00252		-8123420	-0.0016		-9486070	0.01814		-10848700	0.01374		-12205600	0.01344
-6864120	0.0042		-8242080	-8.35499e-07		-9625770	0.01688		-10996100	0.01075		-12383600	0.01262
-6955980	0.00547		-8360730	0.00239		-9757830	0.01625		-11158800	0.01254		-12555900	0.01303
-7061250	0.00715		-8473650	0.00479		-9897540	0.01563		-11315700	0.01134		-12730000	0.0114
-7162680	0.00798		-8599960	0.00679		-10035300	0.01376		-11470700	0.01254		-12911800	0.0114
-7254540	0.0084		-8712880	0.00679		-10171200	0.01376		-11627600	0.01374		-13086000	0.01181
-7359800	0.00715		-8833450	0.00679		-10309000	0.01314		-11782700	0.01374		-13262100	0.0114
-7455490	0.00715		-8950190	0.00519		-10441100	0.01314		-11935800	0.01374		-13438100	0.011
-7553100	0.00672		-9059280	0.0032		-10577000	0.01501		-12098400	0.01194		-13610400	0.00978
-7650700	0.00547		-9183680	0.0012		-10718600	0.01314		-12249600	0.00477		-13794100	0.00978
-7742570	0.00547		-9298510	-0.00199		-10850600	0.01251		-12408500	0.00239		-13960600	0.01059
-7842090	0.00504		-9413340	-0.00559		-10994200	0.01125		-12569200	0.00119		-14140500	0.0114
-7941610	0.00504		-9537740	-0.00719		-11128100	0.01251		-12722400	-0.0024		-14320400	0.01181
-8037300	0.00504		-9644910	-0.00839		-11260200	0.01251		-12881200	-0.00119		-14492600	0.01262
-8140640	0.00672		-9767400	-0.00639		-11403700	0.00876		-13034300	0.00119		-14670600	0.01384
-8236340	0.00798		-9887970	-0.00559		-11541500	0.00876		-13185500	0.00119		-14846700	0.01466
-8332030	0.01092		-10000900	-0.00519		-11671700	0.00751		-13352000	0.00358		-15017000	0.01629
-8431550	0.01176		-10121500	-0.0032		-11815200	0.00625		-13501300	0.00537		-15198800	0.01629
-8525320	0.0126		-10238200	-0.00359		-11945300	0.00501		-13660100	0.01134		-15374900	0.01588
-8630580	0.01302		-10353000	-0.00399		-12085000	0.00314		-13817100	0.01314		-15547200	0.01588
-8724360	0.0126		-10475500	-0.00359		-12224800	0.00314		-13970200	0.01134		-15727100	0.01344
-8816230	0.01092		-10590300	-0.0028		-12358700	0.000632096		-14132800	0.01254		-15899300	0.01059
-8921490	0.00883		-10703300	-0.00399		-12500300	0.00125		-14291700	0.01254		-16079200	0.0057
-9013350	0.0063		-10827700	-0.0044		-12628600	0.00125		-14439100	0.01254		-16257200	0.00448
-9114780	0.00547		-10938700	-0.00479		-12768300	0.00314		-14603600	-0.0024		-16429400	0.00366
-9216220	0.00336		-11061100	-0.00479		-12909900	0.00751		-14758700	0.00477		-16605500	0.00448
-9308080	0.00252		-11176000	-0.00399		-13043900	0.00876		-14907900	0.00418		-16781600	0.0057
-9407600	0.00211		-11288900	-0.00519		-13181700	0.01125		-15072500	0.00299		-16957700	0.00814
-9507120	0.00252		-11415200	-0.00559		-13321400	0.01188		-15223700	0.000593595		-17135600	0.01018
-9598980	0.00379		-11526200	-0.00559		-13449600	0.01314		-15386400	0.00119		-17307900	0.01222
-9702330	0.00336		-11644900	-0.00559		-13591200	0.01376		-15543300	-0.00119		-17487800	0.01344
-9798020	0.00126		-11763500	-0.00639		-13730900	0.01188		-15694500	-0.00119		-17663900	0.01466
-9891800	0.00168		-11880300	-0.00679		-13864900	0.00938		-15853400	-0.0024		-17838000	0.01548
-9995140	0.00126		-12000800	-0.00519		-14004600	0.00876		-16012200	-0.00299		-18017900	0.01629
-10087000	0.00168		-12115700	-0.00399		-14142400	0.00688		-16165300	-0.0024		-18190200	0.01466
-10188400	0.00211		-12230500	-0.0032		-14272600	0.00501		-16324200	-3.12418e-06		-18364300	0.01344
-10289900	0.00252		-12351100	-0.00199		-14418000	0.00438		-16475400	0.00119		-18542300	0.01222
-10381700	0.00294		-12467800	-0.00359		-14550100	0.00438		-16632300	0.000593595		-18718400	0.01018
-10483200	0.00504		-12580700	-0.0016		-14689800	0.00814		-16795000	0.00178		-18896400	0.00896
-10578900	0.00547		-12703200	-0.0024		-14829500	0.01063		-16950000	0.00119		-19072400	0.00856
-10674600	0.00504		-12820000	-0.0012		-14957700	0.01125		-17105000	0.00239		-19246600	0.00856
-10774100	0.00547		-12934800	-0.0024		-15103200	0.01376		-17262000	0.00119		-19420700	0.00774
-10875500	0.00547		-13055400	-0.0016		-15239000	0.01438		-17417000	-3.12418e-06		-19596800	0.00814
-10967400	0.00462		-13168300	-8.35499e-07		-15373000	0.01376		-17577700	-0.000601405		-19774800	0.011
-11070700	0.00379		-13290800	0.000797902		-15514600	0.01376		-17732800	-0.00119		-19954700	0.01426
-11164500	0.00294		-13407500	0.000398533		-15646700	0.01376		-17887800	-3.12418e-06		-20130800	0.0167
-11265900	0.00294		-13520400	0.000398533		-15782600	0.01376		-18050400	0.000593595		-20304900	0.01996
-11363500	0.00294		-13642900	0.000797902		-15920400	0.01376		-18199700	0.00178		-20481000	0.02484
-11451600	0.00252		-13753900	0.000797902		-16058200	0.01188		-18354700	0.00418		-20653300	0.02688
-11554900	0.00168		-13874500	0.000797902		-16197900	0.01188		-18513600	0.00418		-20831200	0.03055
-11650600	0.00252		-13997000	-0.0012		-16333700	0.01063		-18666700	0.01194		-21009200	0.03339
-11748200	0.00294		-14108000	-0.0028		-16465800	0.01063		-18827500	0.01552		-21185300	0.03543
-11853500	0.00294		-14228500	-0.00199		-16609300	0.00938		-18982500	0.00657		-21361400	0.03787
-11947300	0.00336		-14345300	-0.00359		-16743300	0.00938		-19135600	0.00657		-21537400	0.04031
-12042900	0.00547		-14460100	-0.00399		-16879200	0.00751		-19296400	0.00537		-21709700	0.04399
-12146300	0.00756		-14584500	-0.0024		-17020800	0.00563		-19453300	0.01075		-21889600	0.04521
-12238200	0.0084		-14699300	-8.35499e-07		-17152900	0.00688		-19608300	0.01493		-22065700	0.04887
-12337700	0.00966		-14812300	0.00239		-17292600	0.00625		-19767200	0.01732		-22243600	0.05417
-12437200	0.01049		-14930900	0.00359		-17428500	0.00688		-19920300	0.02031		-22415900	0.05946
-12532900	0.01176		-15051500	0.00519		-17562400	0.00876		-20077200	0.02269		-22590000	0.06353
-12638100	0.01176		-15162500	0.00719		-17706000	0.00938		-20236000	0.02449		-22764200	0.06923
-12728100	0.01008		-15288800	0.00679		-17839900	0.01001		-20389100	0.02747		-22946000	0.07534
-12827600	0.00883		-15399800	0.00719		-17975800	0.01188		-20549900	0.02807		-23120200	0.08186
-12932900	0.00715		-15520400	0.00598		-18113600	0.01314		-20701100	0.03046		-23296300	0.08674
-13024700	0.00588		-15637100	0.00519		-18245700	0.01376		-20859900	0.03225		-23470400	0.09244
-13128100	0.00588		-15753900	0.0044		-18385400	0.01314		-21018800	0.03345		-23648400	0.09856
-13225700	0.00462		-15876300	0.0028		-18528900	0.01501		-21173800	0.03584		-23824500	0.10589
-13317600	0.00547		-15985400	0.00239		-18657100	0.01563		-21330700	0.03883		-24000500	0.11199
-13419000	0.00715		-16106000	0.00239		-18796800	0.01814		-21489600	0.04241		-24178500	0.12055
-13514700	0.0084		-16224700	0.0012		-18934600	0.01814		-21642700	0.05077		-24352700	0.12747
-13610400	0.00966		-16337600	0.000398533		-19066700	0.01814		-21801600	0.05913		-24523000	0.13561
-13711800	0.01049		-16460100	0.0012		-19210200	0.01876		-21954700	0.0657		-24704800	0.14335
-13805600	0.01176		-16576800	0.00199		-19342300	0.01876		-22109700	0.07167		-24879000	0.15028
-13907000	0.01134		-16693500	0.00199		-19482000	0.01625		-22272400	0.08004		-25057000	0.15924
-14004600	0.00924		-16812200	0.0028		-19623600	0.01563		-22425500	0.08661		-25235000	0.16534
-14100300	0.00883		-16928900	0.00359		-19753800	0.01563		-22578600	0.09438		-25407200	0.17186
-14201700	0.00756		-17043800	0.00359		-19893500	0.01688		-22739300	0.10094		-25587100	0.17756
-14297400	0.0063		-17162400	0.0044		-20031300	0.01814		-22892400	0.10991		-25761300	0.18448
-14389300	0.00504		-17281100	0.00399		-20163300	0.02125		-23055100	0.11767		-25937300	0.191
-14494600	0.00547		-17399700	0.00399		-20304900	0.02625		-23208200	0.12543		-26111500	0.19873
-14590200	0.00547		-17520300	0.00199		-20438900	0.03314		-23359400	0.1326		-26287600	0.20647
-14687900	0.00504		-17631300	-8.35499e-07		-20572900	0.03938		-23522100	0.13977		-26465600	0.21543
-14789300	0.00462		-17750000	-0.000400204		-20716400	0.04563		-23675200	0.14873		-26639700	0.22602
-14885000	0.00379		-17870500	-0.0016		-20850400	0.05001		-23830200	0.15769		-26815800	0.23662
-14980700	0.0042		-17979600	-0.0028		-20988200	0.05376		-23991000	0.16367		-26989900	0.2476
-15078300	0.00336		-18107900	-0.0012		-21129800	0.05751		-24144100	0.16516		-27167900	0.25738
-15174000	0.00252		-18217000	-0.000799573		-21259900	0.06064		-24308700	0.17097		-27344000	0.26797
-15277300	0.00042514		-18339400	-0.000400204		-21399600	0.06376		-24457900	0.17739		-27520100	0.27937
-15373000	5.38971e-06		-18456200	0.000398533		-21535500	0.06626		-24611100	0.18874		-27694200	0.28996
-15468700	5.38971e-06		-18567200	0.00199		-21669500	0.07189		-24775600	0.19636		-27870300	0.30014
-15572000	5.38971e-06		-18691600	0.0028		-21813000	0.07814		-24928700	0.20505		-28050200	0.31032
-15663900	0.00042514		-18806400	0.0028		-21948900	0.08251		-25087600	0.21063		-28224400	0.3201
-15763400	0.00168		-18921200	0.0028		-22082900	0.08939		-25244500	0.21412		-28400400	0.32906
-15866800	0.00336		-19041800	0.00199		-22224500	0.09814		-25393800	0.22428		-28580300	0.33639
-15956700	0.00504		-19158600	0.0028		-22354600	0.10877		-25552700	0.23503		-28752600	0.34535
-16056200	0.00462		-19271500	0.00359		-22498200	0.11626		-25717200	0.24459		-28930600	0.35431
-16153800	0.00715		-19395900	0.0044		-22632200	0.12815		-25864600	0.25594		-29108500	0.36285
-16251500	0.00756		-19508800	0.00559		-22762300	0.13689		-26027300	0.26729		-29280800	0.37141
-16351000	0.0084		-19629400	0.00799		-22905800	0.14626		-26178500	0.26884		-29456900	0.38159
-16448600	0.0084		-19748000	0.00959		-23039800	0.1569		-26335400	0.27132		-29634800	0.3934
-16548100	0.00883		-19860900	0.01318		-23173800	0.16377		-26498100	0.28565		-29809000	0.40522
-16645700	0.00756		-19981500	0.01478		-23315400	0.18002		-26649300	0.29879		-29988900	0.41702
-16737600	0.00924		-20098200	0.01557		-23451300	0.18877		-26806200	0.30999		-30161200	0.42883
-16842800	0.00798		-20211200	0.01638		-23587200	0.19752		-26963100	0.31999		-30335300	0.44267
-16936600	0.00715		-20335600	0.01557		-23726900	0.20377		-27116300	0.32615		-30513300	0.45815
-17034200	0.00588		-20448500	0.01438		-23860800	0.21377		-27277000	0.33149		-30687500	0.472
-17133700	0.00588		-20567100	0.01358		-24002500	0.2194		-27433900	0.33731		-30867400	0.48748
-17229400	0.00504		-20685800	0.01358		-24136400	0.22628		-27587100	0.35732		-31043400	0.5001
-17327000	0.00588		-20800600	0.01438		-24274200	0.23503		-27749700	0.37241		-31219500	0.51843
-17426500	0.00798		-20923100	0.01517		-24410100	0.2444		-27900900	0.38869		-31395600	0.53879
-17520300	0.01092		-21034100	0.01837		-24544100	0.25316		-28057900	0.3975		-31569700	0.55996
-17623700	0.01302		-21150800	0.02117		-24683800	0.26503		-28214800	0.41064		-31747700	0.57911
-17719400	0.01512		-21271400	0.02516		-24821600	0.27378		-28373600	0.41751		-31923800	0.60191
-17815000	0.01638		-21390100	0.02796		-24955500	0.28316		-28532500	0.42578		-32096000	0.62838
-17916500	0.01764		-21504900	0.03394		-25093300	0.29316		-28685600	0.43318		-32279800	0.65811
-18012200	0.01721		-21621700	0.03674		-25231100	0.30316		-28834900	0.44572		-32450100	0.68377
-18107900	0.01679		-21740300	0.04153		-25367000	0.31191		-28997500	0.45812		-32624200	0.71268
-18211200	0.01512		-21859000	0.04432		-25510500	0.32129		-29154500	0.46633		-32806100	0.74282
-18303100	0.01217		-21979500	0.04832		-25640700	0.33003		-29309500	0.48067		-32980200	0.77744
-18402600	0.01092		-22092500	0.05312		-25780400	0.34066		-29468300	0.49934		-33158200	0.80798
-18507900	0.00966		-22209200	0.05511		-25916300	0.35191		-29623400	0.52222		-33334300	0.83933
-18599700	0.00924		-22325900	0.05831		-26050200	0.36441		-29780300	0.5425		-33506500	0.87354
-18701100	0.01049		-22438900	0.0607		-26195700	0.37941		-29937200	0.56908		-33686400	0.90694
-18798800	0.01134		-22563300	0.0631		-26331600	0.39317		-30092300	0.58386		-33862500	0.94197
-18890600	0.01217		-22678100	0.06749		-26457900	0.40629		-30253000	0.60715		-34038600	0.97902
-18992100	0.01428		-22798700	0.07068		-26603300	0.41879		-30408000	0.63135		-34210800	1.01608
-19087700	0.01512		-22913500	0.07428		-26737300	0.43066		-30563100	0.6518		-34386900	1.05559
-19187300	0.01638		-23026400	0.07867		-26875100	0.44192		-30721900	0.68584		-34561000	1.09265
-19288700	0.01764		-23150800	0.08467		-27018600	0.4513		-30873100	0.72915		-34739000	1.1289
-19380600	0.01764		-23263700	0.09105		-27143000	0.46004		-31033900	0.76365		-34915100	1.16269
-19483900	0.01679		-23382400	0.09584		-27284700	0.46941		-31190800	0.7962		-35091200	1.19934
-19579600	0.01847		-23502900	0.10064		-27424400	0.4813		-31345800	0.83174		-35271100	1.23519
-19675300	0.01889		-23615900	0.10583		-27556400	0.49254		-31500800	0.87534		-35439500	1.2702
-19776700	0.01889		-23728800	0.10983		-27698100	0.5063		-31655900	0.91895		-35625100	1.30808
-19872400	0.01974		-23855100	0.11342		-27832000	0.5188		-31814700	0.95687		-35795500	1.3488
-19966200	0.02183		-23969900	0.11781		-27967900	0.53567		-31975500	0.9954		-35969600	1.39361
-20069500	0.0231		-24086700	0.1194		-28111400	0.5513		-32124700	1.02317		-36151400	1.44248
-20165200	0.02351		-24205300	0.1226		-28241600	0.56505		-32287400	1.05274		-36325600	1.49419
-20264700	0.02435		-24322100	0.12619		-28381300	0.58068		-32444300	1.08589		-36497800	1.55651
-20364300	0.02645		-24438800	0.12979		-28524800	0.59631		-32595500	1.13666		-36677700	1.62818
-20454200	0.02729		-24555500	0.13418		-28655000	0.6138		-32756300	1.18205		-36851900	1.70637
-20559500	0.02729		-24674200	0.13897		-28792800	0.63131		-32911300	1.22566		-37029900	1.79597
-20657100	0.02771		-24796700	0.14497		-28932500	0.64943		-33064400	1.27465		-37206000	1.89371
-20750900	0.02897		-24907700	0.15095		-29058800	0.66381		-33229000	1.32721		-37380100	2.00284
-20856100	0.03106		-25028300	0.15575		-29206200	0.68131		-33380200	1.38276		-37560000	2.12299
-20949900	0.03023		-25145000	0.16413		-29342000	0.70256		-33537100	1.43772		-37732300	2.24842
-21043700	0.03233		-25257900	0.16812		-29477900	0.72506		-33696000	1.49207		-37910200	2.38322
-21147000	0.03233		-25382300	0.17212		-29615700	0.74819		-33852900	1.54882		-38088200	2.53064
-21240800	0.03359		-25497200	0.17532		-29751600	0.77382		-34009900	1.60676		-38260500	2.68906
-21342200	0.03569		-25615800	0.17931		-29887500	0.80444		-34163000	1.66768		-38436500	2.85888
-21437900	0.03905		-25730600	0.1853		-30027200	0.83633		-34314200	1.72921		-38612600	3.04052
-21531700	0.04324		-25849300	0.1901		-30161200	0.8657		-34476800	1.79313		-38788700	3.23477
-21635000	0.04701		-25968000	0.19409		-30300900	0.89757		-34633800	1.85585		-38968600	3.44288
-21728800	0.05164		-26084700	0.20168		-30438700	0.93508		-34788800	1.91797		-39140800	3.65913
-21826400	0.05499		-26197600	0.20766		-30566900	0.97445		-34949600	1.9783		-39315000	3.88271
-21927900	0.05877		-26320100	0.21325		-30710400	1.01446		-35098800	2.03982		-39491100	4.11443
-22021600	0.06128		-26434900	0.21765		-30846300	1.05634		-35257700	2.1224		-39667100	4.35267
-22123100	0.06423		-26549800	0.22284		-30986000	1.10071		-35420400	2.20021		-39843200	4.59376
-22220700	0.06507		-26672200	0.22763		-31125700	1.14384		-35567700	2.25517		-40025000	4.83445
-22312500	0.06339		-26787100	0.23003		-31257800	1.18323		-35728500	2.31131		-40193400	5.0735
-22417800	0.06423		-26898100	0.23322		-31395600	1.22323		-35887300	2.40899		-40373300	5.31418
-22513500	0.06464		-27022500	0.23641		-31531500	1.26823		-36036600	2.45797		-40549400	5.55283
-22607300	0.06674		-27137300	0.24001		-31663500	1.31386		-36201200	2.50516		-40721700	5.7874
-22706800	0.06885		-27257900	0.2432		-31807000	1.36137		-36354300	2.55474		-40901600	6.01384
-22800600	0.07136		-27372700	0.246		-31939100	1.41074		-36505500	2.60551		-41077600	6.22723
-22902000	0.07472		-27489400	0.2504		-32076900	1.46325		-36670100	2.70767		-41253700	6.42434
-23001500	0.0785		-27611900	0.25439		-32216600	1.51575		-36823200	2.77263		-41431700	6.60027
-23095300	0.08102		-27722900	0.25838		-32350600	1.56951		-36980100	2.85103		-41605900	6.75625
-23196700	0.08563		-27841600	0.26437		-32492200	1.62139		-37135100	2.96066		-41781900	6.89471
-23296300	0.08773		-27960200	0.27037		-32628100	1.67576		-37292100	3.07923		-41958000	7.01648
-23388100	0.09109		-28078900	0.27915		-32762000	1.73014		-37450900	3.1551		-42134100	7.1187
-23487600	0.09319		-28195600	0.28673		-32899800	1.7864		-37605900	3.23514		-42312100	7.20259
-23583300	0.09571		-28312400	0.29393		-33035700	1.8389		-37757100	3.32474		-42484300	7.27671
-23684800	0.09781		-28427200	0.30191		-33173500	1.89203		-37917900	3.4215		-42660400	7.34187
-23784300	0.09907		-28547800	0.3091		-33313200	1.94766		-38072900	3.52484		-42838400	7.40173
-23876100	0.10201		-28670300	0.31669		-33449100	2.00641		-38227900	3.63534		-43014400	7.45672
-23981400	0.10452		-28779400	0.32228		-33585000	2.06267		-38388700	3.84265		-43186700	7.50762
-24080900	0.10872		-28898000	0.32827		-33722800	2.11579		-38539900	3.97107		-43368500	7.55771
-24172800	0.1125		-29016700	0.33466		-33856800	2.16392		-38702600	4.10546		-43538800	7.60129
-24274200	0.11543		-29131500	0.34464		-34000300	2.21268		-38855700	4.24345		-43722500	7.63916
-24369900	0.11838		-29255900	0.35343		-34132300	2.25831		-39008800	4.39159		-43892900	7.67133
-24469400	0.12257		-29366900	0.36262		-34268200	2.30081		-39175300	4.55346		-44072800	7.70228
-24570900	0.12677		-29491300	0.37499		-34409900	2.34206		-39324600	4.72549		-44250800	7.73161
-24666600	0.13097		-29606100	0.38937		-34540000	2.38706		-39481500	4.91066		-44423000	7.75523
-24766100	0.13474		-29717100	0.40654		-34679700	2.42894		-39642300	5.10121		-44597200	7.78048
-24863700	0.13936		-29841500	0.42172		-34821300	2.46458		-39791500	5.21288		-44777100	7.80369
-24955500	0.14397		-29954500	0.43689		-34955300	2.5002		-39946600	5.50679		-44949300	7.83179
-24909600	0.14776		-29897000	0.45447		-34888300	2.53895		-39875700	6.88603		-44865100	7.85866
-24812000	0.15154		-29782200	0.47164		-34748600	2.57833		-39715000	7.31527		-44687100	7.88881
-24708700	0.1549		-29657800	0.49321		-34607000	2.61771		-39558100	7.39737		-44505300	7.9222
-24614900	0.15826		-29541100	0.51357		-34473000	2.65646		-39399200	7.61122		-44335000	7.95804
-24513400	0.16119		-29428200	0.53275		-34337100	2.69834		-39244200	7.68973		-44155100	7.99713
-24415800	0.16581		-29305700	0.55151		-34197400	2.7346		-39093000	7.76347		-43980900	8.03419
-24318200	0.16917		-29192800	0.57068		-34067300	2.7696		-38930300	7.78372		-43802900	8.06921
-24216800	0.17294		-29074100	0.58944		-33921800	2.80085		-38773400	7.83536		-43630700	8.1022
-24126900	0.17756		-28953500	0.60542		-33787900	2.82648		-38618400	7.87146		-43448900	8.13479
-24025400	0.18091		-28838700	0.6186		-33653900	2.8471		-38461400	7.92505		-43274700	8.16248
-23925900	0.18427		-28720000	0.63019		-33512300	2.86086		-38308300	7.9534		-43094800	8.1865
-23830200	0.1868		-28601400	0.63737		-33378300	2.87148		-38149500	7.97607		-42926400	8.20891
-23728800	0.18806		-28488500	0.63857		-33238600	2.87648		-37990600	8.00234		-42746500	8.22886
-23633100	0.18848		-28369800	0.63897		-33100800	2.87773		-37839400	8.0174		-42562800	8.24882
-23543100	0.18806		-28253100	0.64017		-32968700	2.87773		-37678700	8.03605		-42396300	8.26632
-23437900	0.18638		-28134400	0.64017		-32829000	2.87148		-37523700	8.06368		-42214400	8.28465
-23340300	0.18595		-28013800	0.63737		-32695100	2.86648		-37364800	8.0656		-42040300	8.30623
-23244600	0.18595		-27900900	0.63418		-32559200	2.8621		-37207900	8.0824		-41870000	8.32416
-23145100	0.18512		-27780300	0.63058		-32415600	2.85961		-37056700	8.08602		-41688100	8.3376
-23049400	0.18595		-27663600	0.62979		-32283600	2.85585		-36894000	8.08946		-41515900	8.34574
-22951800	0.18763		-27550700	0.62619		-32147700	2.85148		-36737100	8.09081		-41341700	8.35673
-22852200	0.18848		-27426300	0.623		-32006100	2.84835		-36589700	8.08947		-41158000	8.36407
-22756600	0.19015		-27315300	0.6198		-31874000	2.84835		-36428900	8.08708		-40991500	8.36936
-22657000	0.19099		-27192800	0.6162		-31734300	2.84335		-36272000	8.08589		-40807800	8.37099
-22557500	0.19057		-27078000	0.61142		-31590800	2.83586		-36120800	8.08304		-40633600	8.37343
-22463700	0.18931		-26963100	0.60623		-31460600	2.82648		-35952400	8.07961		-40461400	8.37629
-22360400	0.18721		-26842600	0.60262		-31320900	2.8171		-35805000	8.07498		-40281500	8.38117
-22268500	0.18427		-26725800	0.59943		-31190800	2.80522		-35651900	8.06946		-40107300	8.38647
-22169000	0.18302		-26611000	0.59424		-31051100	2.79085		-35489200	8.05766		-39931200	8.39135
-22069500	0.18008		-26488500	0.58546		-30909500	2.77585		-35328500	8.04288		-39751300	8.39583
-21975700	0.17714		-26371800	0.57906		-30775500	2.76522		-35175400	8.03258		-39579100	8.39868
-21874300	0.17672		-26255000	0.57107		-30637700	2.75397		-35020400	8.00689		-39401100	8.40194
-21780500	0.17588		-26132500	0.56189		-30503700	2.74085		-34865300	7.9818		-39221200	8.4052
-21684800	0.17504		-26021500	0.55351		-30367800	2.72585		-34704600	7.96747		-39050900	8.40886
-21583400	0.17504		-25902900	0.54632		-30222400	2.71396		-34551500	7.9515		-38871000	8.40886
-21485800	0.17378		-25782300	0.53913		-30088400	2.70085		-34396500	7.92975		-38696800	8.40479
-21386200	0.17336		-25671300	0.53275		-29954500	2.68834		-34235700	7.90477		-38524600	8.3995
-21290600	0.17378		-25546900	0.52596		-29816700	2.67146		-34080700	7.86939		-38340900	8.39868
-21189100	0.17421		-25432100	0.51916		-29680800	2.65834		-33923700	7.84282		-38168600	8.39868
-21089600	0.17168		-25323000	0.51397		-29548700	2.65021		-33768700	7.82027		-37996400	8.39787
-20986300	0.17126		-25192900	0.50878		-29403300	2.63646		-33617500	7.76502		-37814600	8.39787
-20898200	0.17085		-25087600	0.50159		-29269300	2.61896		-33452900	7.72337		-37644200	8.39787
-20794900	0.16958		-24963200	0.49441		-29127700	2.60459		-33299800	7.69052		-37464300	8.39624
-20703000	0.16917		-24844500	0.48881		-28993700	2.59271		-33144800	7.64917		-37288300	8.39542
-20603500	0.16707		-24733500	0.48202		-28859800	2.58271		-32987900	7.61603		-37117900	8.39135
-20500100	0.16455		-24609100	0.47484		-28720000	2.56895		-32830900	7.53838		-36936100	8.38361
-20412100	0.16413		-24494300	0.46564		-28586100	2.55083		-32672100	7.45952		-36763900	8.37547
-20308800	0.16328		-24383300	0.45966		-28446400	2.53582		-32513200	7.35882		-36587800	8.36488
-20209200	0.16119		-24255100	0.45287		-28304700	2.52207		-32362100	7.28929		-36406000	8.3547
-20115500	0.15909		-24138300	0.44688		-28176500	2.50833		-32205100	7.22433		-36235600	8.34778
-20012100	0.15826		-24029200	0.43969		-28034900	2.4902		-32044400	7.07274		-36055700	8.34248
-19916400	0.15867		-23910600	0.4349		-27895200	2.47707		-31893200	6.89831		-35875800	8.33352
-19822700	0.15826		-23790000	0.42971		-27765000	2.46458		-31732400	6.76061		-35705500	8.32049
-19719300	0.15741		-23675200	0.42491		-27623400	2.44957		-31579300	6.61814		-35523700	8.30297
-19625500	0.15658		-23552700	0.41972		-27487500	2.43207		-31418500	6.51958		-35351500	8.28791
-19526000	0.15531		-23441700	0.41453		-27353600	2.41207		-31261600	6.41803		-35177300	8.2704
-19426500	0.1549		-23317300	0.41254		-27211900	2.39894		-31110400	6.31469		-34997400	8.25084
-19334600	0.15322		-23204400	0.40774		-27081800	2.38332		-30955400	6.21076		-34827100	8.2313
-19231300	0.15028		-23091500	0.40295		-26940200	2.36269		-30796500	6.10802		-34649100	8.21053
-19135600	0.14901		-22967100	0.39936		-26798600	2.34081		-30637700	5.9999		-34471100	8.18854
-19039900	0.14776		-22852200	0.39656		-26670300	2.32144		-30476900	5.88879		-34298800	8.16248
-18936600	0.1465		-22733600	0.39177		-26528700	2.30331		-30323800	5.77232		-34117000	8.13683
-18840900	0.14524		-22613000	0.38937		-26390900	2.28393		-30176500	5.65107		-33944800	8.11157
-18743300	0.14314		-22507800	0.38498		-26256900	2.26393		-30006100	5.53279		-33770600	8.08958
-18643700	0.14356		-22381400	0.38099		-26117200	2.24705		-29851100	5.40974		-33590700	8.06677
-18551900	0.14104		-22264700	0.37699		-25983300	2.22893		-29698000	5.28609		-33420400	8.04519
-18452400	0.13684		-22149900	0.3722		-25847400	2.2083		-29543000	5.15946		-33242400	8.0232
-18352800	0.13474		-22031200	0.36661		-25707700	2.18392		-29389900	5.03522		-33060600	8.00284
-18257100	0.1318		-21914500	0.36142		-25573700	2.1583		-29227200	4.90739		-32890300	7.98369
-18155700	0.12887		-21797700	0.35543		-25430200	2.13642		-29072200	4.77658		-32712300	7.95926
-18063800	0.12593		-21677200	0.35183		-25296200	2.1133		-28919100	4.64756		-32528600	7.9336
-17964300	0.12425		-21560400	0.34624		-25164100	2.08955		-28756400	4.52092		-32362100	7.90551
-17862900	0.12257		-21443700	0.34184		-25024400	2.06704		-28603300	4.39429		-32182200	7.87659
-17769100	0.12215		-21325000	0.33746		-24884700	2.04642		-28450200	4.26407		-32009900	7.84523
-17669600	0.12006		-21212100	0.33346		-24750800	2.02267		-28289400	4.13863		-31833800	7.81061
-17568200	0.12006		-21089600	0.32987		-24611100	1.99829		-28134400	4.01081		-31650100	7.77111
-17478200	0.12006		-20974800	0.32507		-24477100	1.97391		-27975600	3.88178		-31483600	7.73039
-17376800	0.11879		-20859900	0.32228		-24339300	1.95078		-27818600	3.74439		-31305600	7.68111
-17281100	0.11628		-20735500	0.31988		-24199600	1.92641		-27669300	3.61		-31123800	7.62491
-17183500	0.11417		-20624500	0.31749		-24065600	1.89766		-27506700	3.48516		-30955400	7.56463
-17080100	0.11166		-20502100	0.31469		-23924000	1.86765		-27353600	3.37465		-30771700	7.50029
-16990200	0.10998		-20385300	0.31309		-23790000	1.84577		-27196600	3.27131		-30597500	7.43024
-16890700	0.10704		-20272400	0.3103		-23654100	1.82015		-27034000	3.1829		-30425300	7.35368
-16787300	0.10452		-20148000	0.3063		-23516300	1.79077		-26882800	3.10705		-30243400	7.27264
-16695500	0.10201		-20035100	0.30151		-23386200	1.75827		-26727700	3.04134		-30075000	7.18793
-16594000	0.0999		-19920300	0.29831		-23244600	1.72701		-26565100	2.98102		-29893200	7.09833
-16494500	0.09739		-19797800	0.29352		-23099100	1.70263		-26412000	2.92128		-29715200	7.00141
-16402600	0.09486		-19684900	0.28714		-22970900	1.67388		-26255000	2.87051		-29544900	6.89634
-16299300	0.09403		-19566200	0.28195		-22827400	1.64013		-26100000	2.78478		-29365000	6.78638
-16205500	0.09319		-19447500	0.27716		-22697200	1.60701		-25946900	2.70024		-29190800	6.67235
-16107900	0.09235		-19334600	0.27475		-22563300	1.577		-25784200	2.65963		-29018600	6.55099
-16006500	0.09277		-19217900	0.27236		-22417800	1.54575		-25631100	2.58047		-28838700	6.428
-15910800	0.09277		-19091600	0.27116		-22285700	1.51075		-25476100	2.50609		-28662600	6.30379
-15815100	0.09277		-18982500	0.26996		-22149900	1.4745		-25311500	2.4365		-28488500	6.17673
-15713700	0.09277		-18860000	0.26917		-22006300	1.44261		-25160300	2.40961		-28306700	6.04559
-15618000	0.09235		-18745200	0.26836		-21878100	1.41137		-25001500	2.36302		-28132500	5.90917
-15514600	0.09067		-18632300	0.26757		-21738400	1.38074		-24846500	2.31133		-27956400	5.76948
-15418900	0.08984		-18505900	0.26398		-21598700	1.34511		-24693300	2.28446		-27776500	5.62573
-15323200	0.08689		-18394900	0.26078		-21462800	1.30949		-24528800	2.25758		-27606200	5.47789
-15214200	0.08438		-18270500	0.25679		-21323100	1.28073		-24377600	2.21218		-27426300	5.32762
-15124200	0.07976		-18155700	0.25239		-21187200	1.24948		-24220600	2.17424		-27254000	5.17409
-15028500	0.0764		-18044700	0.246		-21059000	1.21448		-24063700	2.13004		-27078000	5.01607
-14921300	0.07514		-17922200	0.24241		-20915400	1.17759		-23914400	2.09839		-26898100	4.85725
-14833300	0.07346		-17809300	0.23921		-20779600	1.14448		-23751700	2.06075		-26727700	4.69598
-14733800	0.07136		-17688700	0.23402		-20639900	1.11259		-23592900	2.0267		-26547800	4.53023
-14638100	0.07178		-17572000	0.23162		-20502100	1.08009		-23437900	1.99444		-26367900	4.36651
-14540500	0.07094		-17453300	0.22883		-20371900	1.04947		-23280900	1.96219		-26197600	4.19955
-14437100	0.0701		-17338500	0.22643		-20230300	1.01946		-23124000	1.92814		-26019600	4.03135
-14341500	0.06926		-17219800	0.22364		-20094400	0.99321		-22969000	1.8917		-25845500	3.86112
-14241900	0.06759		-17103100	0.22204		-19958500	0.9607		-22812100	1.85945		-25673200	3.6917
-14142400	0.06674		-16982500	0.21964		-19816900	0.93133		-22655100	1.8254		-25491400	3.52352
-14050500	0.06464		-16863900	0.21804		-19681000	0.9057		-22502000	1.78837		-25319200	3.35369
-13951000	0.06213		-16752900	0.21526		-19550900	0.8807		-22337400	1.74895		-25143100	3.18386
-13849600	0.06087		-16630400	0.21366		-19407400	0.85757		-22190100	1.71131		-24963200	3.01486
-13757700	0.05919		-16517500	0.21206		-19273400	0.83695		-22031200	1.67667		-24792900	2.89438
-13656300	0.05877		-16402600	0.20847		-19131800	0.8232		-21876200	1.63904		-24613000	2.77512
-13560600	0.05835		-16272500	0.20607		-18997800	0.8082		-21721200	1.59842		-24431200	2.65749
-13464900	0.05751		-16163400	0.20367		-18865700	0.79382		-21560400	1.56019		-24262700	2.50274
-13361600	0.05709		-16040900	0.20008		-18722200	0.77944		-21405400	1.52495		-24080900	2.35857
-13267800	0.05709		-15926100	0.19689		-18586300	0.77007		-21252300	1.48612		-23906800	2.23355
-13168300	0.05625		-15815100	0.19529		-18450400	0.75632		-21087700	1.4479		-23736400	2.12278
-13070700	0.05499		-15690700	0.19169		-18308800	0.74444		-20934600	1.40608		-23552700	2.02871
-12976900	0.0529		-15577800	0.18969		-18178700	0.73069		-20779600	1.36845		-23382400	1.94481
-12873500	0.05079		-15457200	0.1869		-18042800	0.71694		-20620700	1.32963		-23204400	1.87232
-12775900	0.04911		-15340500	0.18491		-17903100	0.70194		-20469500	1.29319		-23022600	1.81042
-12680200	0.04701		-15223700	0.1829		-17769100	0.68694		-20306900	1.25794		-22854200	1.75382
-12580700	0.04492		-15108900	0.18051		-17631300	0.67443		-20153700	1.22568		-22672300	1.70249
-12485000	0.04408		-14986400	0.17851		-17493500	0.66319		-19996800	1.19164		-22498200	1.6577
-12389300	0.04198		-14871600	0.17532		-17357600	0.65255		-19838000	1.1558		-22325900	1.6129
-12284100	0.04156		-14751000	0.17173		-17217900	0.64193		-19684900	1.11876		-22142200	1.57096
-12192200	0.04114		-14634300	0.16773		-17084000	0.63068		-19529800	1.08353		-21971900	1.53267
-12088900	0.04156		-14517500	0.16293		-16946200	0.62193		-19369100	1.05186		-21797700	1.49888
-11993200	0.04324		-14397000	0.15655		-16802600	0.61443		-19217900	1.01602		-21617800	1.46711
-11897500	0.04366		-14285900	0.15375		-16674400	0.60442		-19057100	0.97958		-21445600	1.43698
-11799900	0.04366		-14169200	0.15176		-16532800	0.59505		-18898300	0.95032		-21267600	1.37975
-11702300	0.04366		-14044800	0.14896		-16395000	0.58631		-18747100	0.91985		-21085800	1.33388
-11604700	0.04408		-13937600	0.14736		-16262900	0.57942		-18584400	0.89059		-20917400	1.30781
-11503200	0.04408		-13815100	0.14576		-16121300	0.57067		-18431300	0.8667		-20741300	1.27971
-11411400	0.0424		-13694600	0.14337		-15987300	0.5638		-18272500	0.84399		-20567100	1.20593
-11311900	0.04114		-13583600	0.14018		-15847600	0.5538		-18115500	0.8225		-20387200	1.17865
-11210400	0.03946		-13461100	0.13658		-15715600	0.5463		-17964300	0.7986		-20209200	1.10405
-11118600	0.03695		-13346300	0.13298		-15577800	0.53942		-17807400	0.7753		-20037000	1.07555
-11017100	0.03442		-13231400	0.12779		-15436200	0.5288		-17644700	0.7544		-19862800	1.04418
-10917600	0.03316		-13107000	0.1238		-15298400	0.52067		-17495400	0.73528		-19679100	1.01283
-10821900	0.03233		-12992200	0.11901		-15166300	0.5138		-17334700	0.71497		-19510700	0.98188
-10724300	0.03274		-12873500	0.11502		-15026600	0.50692		-17181600	0.69586		-19327000	0.9493
-10628600	0.03442		-12758700	0.11222		-14890700	0.49817		-17026600	0.67914		-19154700	0.91713
-10531000	0.0361		-12643900	0.10983		-14758700	0.4913		-16862000	0.6654		-18980600	0.8882
-10431500	0.0382		-12525200	0.10703		-14613200	0.48317		-16712700	0.65165		-18796800	0.86052
-10337700	0.0403		-12406600	0.10503		-14479200	0.47817		-16551900	0.63791		-18628400	0.83323
-10234400	0.04198		-12291700	0.10343		-14343400	0.47192		-16393100	0.62777		-18450400	0.80554
-10140600	0.0424		-12167300	0.10263		-14203700	0.46441		-16238100	0.61642		-18270500	0.77988
-10044900	0.04156		-12056300	0.09984		-14073500	0.45817		-16084900	0.60567		-18098300	0.75545
-9941560	0.04114		-11937700	0.09864		-13931900	0.44941		-15928000	0.59432		-17920300	0.72979
-9842040	0.03988		-11813300	0.09545		-13792200	0.44254		-15773000	0.58177		-17742300	0.70617
-9746350	0.03695		-11702300	0.09185		-13662000	0.43566		-15612200	0.56923		-17575800	0.68377
-9646830	0.03527		-11579800	0.08866		-13516600	0.43066		-15459100	0.55967		-17392100	0.66422
-9549220	0.03442		-11465000	0.08467		-13386500	0.42441		-15302200	0.55012		-17217900	0.6463
-9447790	0.03359		-11354000	0.08106		-13252500	0.41941		-15141400	0.53816		-17043800	0.62879
-9352100	0.03401		-11229600	0.07747		-13108900	0.41566		-14994100	0.52681		-16865800	0.61372
-9258320	0.03233		-11120500	0.07468		-12975000	0.40817		-14831400	0.51487		-16691600	0.60029
-9154970	0.03316		-10994200	0.06948		-12835300	0.40066		-14672500	0.50352		-16513600	0.58766
-9063110	0.03316		-10879300	0.0647		-12695600	0.39566		-14519400	0.49217		-16335700	0.57504
-8965500	0.03359		-10762600	0.0631		-12565400	0.38441		-14360600	0.48142		-16165300	0.562
-8862160	0.03274		-10645800	0.0603		-12425700	0.37504		-14203700	0.47245		-15981600	0.55019
-8770290	0.03274		-10529100	0.05991		-12287900	0.36504		-14050500	0.46589		-15813200	0.53838
-8670770	0.03191		-10414300	0.05831		-12150100	0.35629		-13891700	0.45752		-15633300	0.52575
-8569340	0.03106		-10291800	0.05791		-12010400	0.34753		-13734800	0.44976		-15453400	0.51435
-8475560	0.03065		-10177000	0.05831		-11876400	0.33878		-13577800	0.44439		-15283100	0.50377
-8377960	0.02897		-10064000	0.0587		-11740600	0.33191		-13417100	0.43841		-15103200	0.49318
-8272700	0.02897		-9943470	0.0587		-11600800	0.32691		-13267800	0.43363		-14925200	0.48382
-8182750	0.02855		-9826730	0.05951		-11470700	0.32003		-13108900	0.42467		-14754800	0.4724
-8079400	0.02771		-9711900	0.05831		-11327200	0.31503		-12953900	0.4169		-14573000	0.46508
-7989450	0.02603		-9587500	0.0575		-11193200	0.30878		-12797000	0.40795		-14398900	0.45531
-7889930	0.02603		-9474580	0.05591		-11059200	0.30316		-12638100	0.3972		-14226600	0.44797
-7788500	0.02519		-9354010	0.05471		-10915700	0.29753		-12485000	0.38644		-14044800	0.43901
-7694720	0.02478		-9241090	0.05431		-10785600	0.29128		-12330000	0.37688		-13872600	0.43087
-7593290	0.02478		-9126270	0.05271		-10643900	0.28128		-12169300	0.37226		-13698400	0.42557
-7493770	0.02519		-8998040	0.05231		-10502300	0.2744		-12014200	0.3633		-13516600	0.41824
-7403820	0.02393		-8883210	0.05312		-10374100	0.26753		-11855400	0.35807		-13344300	0.41214
-7300470	0.02478		-8768380	0.05192		-10236300	0.25752		-11700400	0.35446		-13164400	0.40602
-7206700	0.02519		-8647810	0.05111		-10098500	0.25065		-11547300	0.34986		-12984500	0.3991
-7105260	0.02435		-8534890	0.04992		-9962610	0.24128		-11386500	0.34822		-12820000	0.3934
-7003830	0.02435		-8418150	0.04752		-9822900	0.23378		-11233400	0.34538		-12638100	0.38485
-6913880	0.02519		-8297580	0.04633		-9685100	0.22503		-11076500	0.33702		-12462100	0.37752
-6810530	0.02435		-8180830	0.04473		-9549220	0.21815		-10917600	0.32865		-12287900	0.36897
-6714840	0.02478		-8064090	0.04353		-9413340	0.21003		-10758800	0.32328		-12106100	0.36083
-6621070	0.02478		-7949260	0.04313		-9279370	0.20315		-10601800	0.31492		-11939600	0.35227
-6519630	0.02561		-7828690	0.04233		-9135830	0.19752		-10446800	0.30596		-11759700	0.34494
-6422030	0.02687		-7711950	0.04313		-9001870	0.19127		-10293700	0.29641		-11579800	0.33842
-6326340	0.02771		-7597120	0.04393		-8867900	0.18752		-10136800	0.29102		-11407600	0.33191
-6226820	0.02812		-7476550	0.04393		-8722450	0.18315		-9977920	0.29062		-11225700	0.32702
-6133040	0.02855		-7357890	0.04473		-8592310	0.17939		-9824810	0.28296		-11053500	0.32214
-6033520	0.02687		-7250710	0.04353		-8458340	0.17439		-9664050	0.27834		-10881300	0.31724
-5930170	0.02603		-7122490	0.04193		-8310970	0.16252		-9516690	0.27491		-10699400	0.31276
-5838310	0.02435		-7009570	0.03874		-8182750	0.15752		-9354010	0.26908		-10531000	0.30788
-5736880	0.02351		-6896660	0.03714		-8041120	0.15002		-9195160	0.26759		-10351100	0.30055
-5641190	0.02099		-6768430	0.03475		-7907160	0.14626		-9042060	0.26177		-10171200	0.29444
-5545490	0.01931		-6659340	0.03315		-7769360	0.14064		-8883210	0.25893		-10000900	0.28793
-5445970	0.01764		-6538770	0.03075		-7629650	0.13502		-8724360	0.25549		-9822900	0.28101
-5350280	0.01931		-6416290	0.02915		-7493770	0.13126		-8575080	0.25027		-9643000	0.2753
-5252680	0.01974		-6305280	0.02796		-7361720	0.12815		-8410490	0.24803		-9474580	0.26756
-5151250	0.02057		-6182800	0.02835		-7218180	0.12502		-8259300	0.2458		-9290850	0.26186
-5057470	0.02183		-6071800	0.02835		-7089950	0.12315		-8102370	0.24056		-9124350	0.25779
-4956030	0.02267		-5955050	0.02875		-6954070	0.11814		-7941610	0.23654		-8944450	0.25086
-4858430	0.02393		-5836400	0.02956		-6808620	0.11626		-7792330	0.22758		-8766470	0.24476
-4760820	0.02351		-5717740	0.03035		-6678480	0.11377		-7629650	0.21922		-8596140	0.23986
-4663220	0.0231		-5601000	0.03035		-6536860	0.11002		-7472720	0.21144		-8414320	0.23294
-4567530	0.02225		-5484250	0.03115		-6400970	0.10689		-7321530	0.20249		-8234420	0.22684
-4469920	0.01974		-5369420	0.03234		-6268920	0.10502		-7162680	0.19413		-8067920	0.21951
-4368490	0.01764		-5250760	0.03315		-6127300	0.10377		-7009570	0.18696		-7886110	0.21299
-4276630	0.01596		-5130190	0.03315		-5993330	0.10251		-6852640	0.18039		-7710030	0.20689
-4171370	0.0147		-5019190	0.03195		-5855530	0.10377		-6695700	0.17262		-7537790	0.19955
-4073760	0.0147		-4890960	0.02956		-5715820	0.10626		-6538770	0.16724		-7357890	0.19303
-3979980	0.01512		-4778050	0.02875		-5585680	0.10689		-6381840	0.15888		-7185640	0.18815
-3876640	0.01553		-4663220	0.02595		-5442150	0.10689		-6226820	0.15411		-7007660	0.18326
-3779030	0.01596		-4540730	0.02435		-5306270	0.10251		-6075620	0.14694		-6829670	0.17756
-3685250	0.01553		-4431650	0.02277		-5170380	0.10189		-5909120	0.14156		-6657430	0.17186
-3583820	0.01596		-4307250	0.02157		-5028760	0.09689		-5754100	0.13678		-6479440	0.16616
-3488130	0.01679		-4190500	0.02316		-4894790	0.09439		-5601000	0.13379		-6301460	0.16168
-3394350	0.01638		-4073760	0.02316		-4762740	0.08876		-5444060	0.1332		-6127300	0.15638
-3289090	0.01553		-3957020	0.02396		-4621120	0.08439		-5287130	0.13141		-5949310	0.1519
-3193400	0.01806		-3842190	0.02676		-4483320	0.08126		-5130190	0.12842		-5780890	0.14702
-3095790	0.01721		-3725440	0.02595		-4349350	0.08126		-4973260	0.12663		-5601000	0.14172
-2998190	0.01764		-3604870	0.02715		-4209640	0.08126		-4818240	0.12484		-5423010	0.13725
-2902500	0.01764		-3490040	0.02556		-4073760	0.08126		-4659390	0.12365		-5250760	0.13277
-2801070	0.01806		-3373300	0.02396		-3937880	0.08376		-4506290	0.12066		-5070860	0.12665
-2709200	0.01764		-3252730	0.02356		-3803910	0.08689		-4353180	0.11767		-4896710	0.12136
-2609680	0.01721		-3137900	0.02236		-3664200	0.08689		-4190500	0.11409		-4724460	0.11607
-2510160	0.01721		-3019240	0.01916		-3524490	0.08751		-4039310	0.10931		-4542650	0.11159
-2416390	0.01764		-2896760	0.01797		-3390520	0.08564		-3878550	0.10393		-4372320	0.10792
-2313040	0.01721		-2787670	0.01837		-3258470	0.08502		-3719700	0.09796		-4192420	0.10548
-2219260	0.01638		-2663270	0.01837		-3114930	0.08314		-3568510	0.09557		-4014430	0.10507
-2121660	0.01679		-2552270	0.01997		-2982880	0.08064		-3409660	0.09258		-3844100	0.10344
-2018310	0.01721		-2435520	0.01997		-2839340	0.07814		-3254640	0.09079		-3662290	0.10344
-1926450	0.01596		-2314950	0.02076		-2705370	0.07626		-3095790	0.09079		-3482390	0.10222
-1830750	0.01512		-2202040	0.02157		-2569490	0.07189		-2936950	0.08959		-3312060	0.10141
-1727410	0.01302		-2079550	0.02157		-2431700	0.06689		-2781930	0.09199		-3132160	0.10059
-1633630	0.01176		-1966640	0.02117		-2299640	0.06314		-2630730	0.09199		-2954170	0.09856
-1536030	0.0126		-1846070	0.02037		-2159930	0.06001		-2468060	0.08959		-2787670	0.0957
-1434590	0.01217		-1727410	0.01916		-2018310	0.05751		-2314950	0.089		-2603940	0.09244
-1342730	0.01217		-1612580	0.01757		-1888170	0.05438		-2158020	0.0884		-2435520	0.08918
-1241300	0.01428		-1497750	0.01797		-1748460	0.05438		-2001090	0.0878		-2257540	0.08674
-1143690	0.01679		-1379090	0.01837		-1612580	0.05564		-1847980	0.08721		-2077640	0.0843
-1051830	0.01931		-1264260	0.01916		-1476700	0.05689		-1687220	0.0878		-1909220	0.08268
-946566	0.02267		-1147520	0.01997		-1336990	0.05626		-1534110	0.08721		-1727410	0.08186
-848961	0.02478		-1023120	0.02037		-1201110	0.05876		-1381010	0.08601		-1549420	0.08226
-759011	0.02645		-910203	0.02076		-1067140	0.05814		-1222160	0.08422		-1379090	0.08022
-653750	0.02687		-791546	0.02037		-929342	0.05814		-1065220	0.08303		-1199190	0.07942
-559973	0.02603		-669061	0.02076		-793460	0.05564		-908289	0.08242		-1026950	0.07982
-456626	0.02351		-559973	0.01997		-653750	0.05189		-751356	0.07765		-850875	0.0782
-359021	0.02225		-433660	0.01877		-514041	0.05063		-596336	0.07526		-672889	0.07697
-267157	0.02142		-320744	0.01797		-381987	0.04814		-437488	0.07228		-502558	0.07494
-165724	0.01721		-207829	0.01717		-240364	0.04626		-276726	0.06869		-318831	0.0733
-70033	0.01553		-83429.8	0.01638		-106396	0.04751		-129362	0.06689		-138931	0.07168

## Sheet: Figure 2d
1st cycle			10^5th cycle
Time	Normalized strain		Time	Normalized strain
s			s
-0.6198	4.07448e-05		-0.6348	-0.00398
-0.6196	4.07448e-05		-0.6346	-0.00369
-0.6194	4.07448e-05		-0.6344	-0.00337
-0.6192	4.07448e-05		-0.6342	-0.00399
-0.619	4.07448e-05		-0.634	-0.00343
-0.6188	4.07448e-05		-0.6338	-0.00285
-0.6186	4.07448e-05		-0.6336	-0.00322
-0.6184	-0.000992947		-0.6334	-0.00336
-0.6182	-0.000777595		-0.6332	-0.00351
-0.618	-0.000571032		-0.633	-0.00271
-0.6178	-0.000373259		-0.6328	-0.00191
-0.6176	-0.000184277		-0.6326	-0.00113
-0.6174	-4.08367e-06		-0.6324	-0.000346897
-0.6172	0.000167319		-0.6322	0.000423928
-0.617	0.000329933		-0.632	0.00119
-0.6168	0.000483756		-0.6318	0.00194
-0.6166	0.000628789		-0.6316	0.00269
-0.6164	0.000765033		-0.6314	0.00343
-0.6162	0.000892486		-0.6312	0.00416
-0.616	0.00101		-0.631	0.00488
-0.6158	0.00112		-0.6308	0.00559
-0.6156	0.00122		-0.6306	0.00726
-0.6154	0.00131		-0.6304	0.00775
-0.6152	0.0014		-0.6302	0.00825
-0.615	0.00147		-0.63	0.00875
-0.6148	0.00154		-0.6298	0.00808
-0.6146	0.0016		-0.6296	0.00719
-0.6144	0.00164		-0.6294	0.00725
-0.6142	0.00168		-0.6292	0.00612
-0.614	0.00171		-0.629	0.00593
-0.6138	0.00174		-0.6288	0.00572
-0.6136	0.00175		-0.6286	0.00548
-0.6134	0.00175		-0.6284	0.00521
-0.6132	0.00175		-0.6282	0.00492
-0.613	0.00174		-0.628	0.00461
-0.6128	0.00171		-0.6278	0.00427
-0.6126	0.00168		-0.6276	0.00391
-0.6124	0.00164		-0.6274	0.00352
-0.6122	0.0016		-0.6272	0.00311
-0.612	0.00154		-0.627	0.00363
-0.6118	0.00147		-0.6268	0.00297
-0.6116	0.0014		-0.6266	0.00325
-0.6114	0.00131		-0.6264	0.00236
-0.6112	0.00122		-0.6262	0.00262
-0.611	0.00215		-0.626	0.00193
-0.6108	0.00183		-0.6258	0.00124
-0.6106	0.0015		-0.6256	0.00054288
-0.6104	0.00118		-0.6254	-0.000150451
-0.6102	0.00085381		-0.6252	-0.000843785
-0.61	0.000528584		-0.625	-0.00154
-0.6098	0.000203358		-0.6248	-0.00223
-0.6096	-0.000121868		-0.6246	-0.00196
-0.6094	-0.000447095		-0.6244	-0.00286
-0.6092	-0.000772321		-0.6242	-0.00374
-0.609	-0.0011		-0.624	-0.00345
-0.6088	-0.00142		-0.6238	-0.0041
-0.6086	-0.00175		-0.6236	-0.00474
-0.6084	-0.00207		-0.6234	-0.00419
-0.6082	-0.00114		-0.6232	-0.00245
-0.608	-0.00123		-0.623	-0.0028
-0.6078	-0.00132		-0.6228	-0.00215
-0.6076	-0.00139		-0.6226	-0.00261
-0.6074	-0.00146		-0.6224	-0.00303
-0.6072	-0.00151		-0.6222	-0.0034
-0.607	-0.00156		-0.622	-0.00371
-0.6068	-0.0016		-0.6218	-0.00398
-0.6066	-0.00163		-0.6216	-0.0042
-0.6064	-0.00165		-0.6214	-0.00437
-0.6062	-0.00167		-0.6212	-0.0045
-0.606	-0.00167		-0.621	-0.00457
-0.6058	-0.00167		-0.6208	-0.00459
-0.6056	-0.00165		-0.6206	-0.00457
-0.6054	-0.00267		-0.6204	-0.00566
-0.6052	-0.00242		-0.6202	-0.00576
-0.605	-0.00217		-0.62	-0.00581
-0.6048	-0.00193		-0.6198	-0.00582
-0.6046	-0.00168		-0.6196	-0.00579
-0.6044	-0.00247		-0.6194	-0.00573
-0.6042	-0.00201		-0.6192	-0.00562
-0.604	-0.00156		-0.619	-0.00546
-0.6038	-0.00111		-0.6188	-0.00623
-0.6036	-0.000676511		-0.6186	-0.0058
-0.6034	-0.000250201		-0.6184	-0.00533
-0.6032	0.000167319		-0.6182	-0.00484
-0.603	0.00057605		-0.618	-0.00431
-0.6028	0.00097599		-0.6178	-0.00374
-0.6026	0.00137		-0.6176	-0.00315
-0.6024	0.00175		-0.6174	-0.00252
-0.6022	0.00212		-0.6172	-0.00282
-0.602	0.00249		-0.617	-0.00193
-0.6018	0.00284		-0.6168	-0.00314
-0.6016	0.00319		-0.6166	-0.00221
-0.6014	0.00353		-0.6164	-0.00244
-0.6012	0.00386		-0.6162	-0.00172
-0.601	0.00418		-0.616	-0.000990582
-0.6008	0.00323		-0.6158	-0.000264626
-0.6006	0.0033		-0.6156	0.000461327
-0.6004	0.00336		-0.6154	0.00119
-0.6002	0.00339		-0.6152	0.00191
-0.6	0.00341		-0.615	0.00264
-0.5998	0.00341		-0.6148	0.00337
-0.5996	0.00339		-0.6146	0.00409
-0.5994	0.00336		-0.6144	0.00365
-0.5992	0.0033		-0.6142	0.00416
-0.599	0.00323		-0.614	0.00466
-0.5988	0.00315		-0.6138	0.00515
-0.5986	0.00304		-0.6136	0.00564
-0.5984	0.00292		-0.6134	0.00612
-0.5982	0.00278		-0.6132	0.00659
-0.598	0.00262		-0.613	0.00588
-0.5978	0.00244		-0.6128	0.00612
-0.5976	0.00225		-0.6126	0.00517
-0.5974	0.00204		-0.6124	0.00516
-0.5972	0.00181		-0.6122	0.00512
-0.597	0.00156		-0.612	0.00506
-0.5968	0.0013		-0.6118	0.00497
-0.5966	0.00102		-0.6116	0.00582
-0.5964	0.000720204		-0.6114	0.00549
-0.5962	0.000403768		-0.6112	0.00514
-0.596	6.97515e-05		-0.611	0.00477
-0.5958	-0.000281844		-0.6108	0.00439
-0.5956	-0.00065102		-0.6106	0.00399
-0.5954	-0.00104		-0.6104	0.00357
-0.5952	-0.000184277		-0.6102	0.00314
-0.595	0.000660433		-0.61	0.00269
-0.5948	0.000247307		-0.6098	0.00223
-0.5946	-0.000165818		-0.6096	0.00174
-0.5944	-0.000578943		-0.6094	0.00125
-0.5942	-0.000767926		-0.6092	0.000732809
-0.594	-0.000732766		-0.609	0.00116
-0.5938	-0.000697607		-0.6088	0.00137
-0.5936	-0.000662447		-0.6086	0.00159
-0.5934	-0.000627288		-0.6084	0.00181
-0.5932	0.000441564		-0.6082	0.000878687
-0.593	0.000261371		-0.608	-3.48476e-05
-0.5928	8.99683e-05		-0.6078	-0.000932073
-0.5926	-7.26449e-05		-0.6076	-0.000853826
-0.5924	-0.000226468		-0.6074	-0.00192
-0.5922	-0.000371501		-0.6072	-0.00296
-0.592	-0.000507745		-0.607	-0.00281
-0.5918	-0.000635198		-0.6068	-0.00358
-0.5916	-0.000753862		-0.6066	-0.00316
-0.5914	-0.000863736		-0.6064	-0.00365
-0.5912	-0.00096482		-0.6062	-0.0041
-0.591	-0.00106		-0.606	-0.00356
-0.5908	-0.00114		-0.6058	-0.00413
-0.5906	-0.00122		-0.6056	-0.00465
-0.5904	-0.00128		-0.6054	-0.00512
-0.5902	-0.00134		-0.6052	-0.00555
-0.59	-0.00139		-0.605	-0.00592
-0.5898	-0.00143		-0.6048	-0.00625
-0.5896	-0.00146		-0.6046	-0.00652
-0.5894	-0.00148		-0.6044	-0.00675
-0.5892	-0.00149		-0.6042	-0.00693
-0.589	-0.0015		-0.604	-0.00706
-0.5888	-0.00149		-0.6038	-0.00714
-0.5886	-0.00148		-0.6036	-0.00718
-0.5884	-0.00146		-0.6034	-0.00716
-0.5882	-0.00143		-0.6032	-0.00709
-0.588	-0.00139		-0.603	-0.00698
-0.5878	-0.00134		-0.6028	-0.00682
-0.5876	-0.00128		-0.6026	-0.00661
-0.5874	-0.00122		-0.6024	-0.00634
-0.5872	-0.00114		-0.6022	-0.00603
-0.587	-0.00106		-0.602	-0.00568
-0.5868	-0.00096482		-0.6018	-0.00527
-0.5866	-0.000863736		-0.6016	-0.00481
-0.5864	-0.000753862		-0.6014	-0.00547
-0.5862	-0.000635198		-0.6012	-0.00513
-0.586	-0.000507745		-0.601	-0.00475
-0.5858	-0.000371501		-0.6008	-0.00433
-0.5856	-0.000226468		-0.6006	-0.00387
-0.5854	-7.26449e-05		-0.6004	-0.00337
-0.5852	8.99683e-05		-0.6002	-0.00379
-0.585	0.000261371		-0.6	-0.00301
-0.5848	-0.00081627		-0.5998	-0.00219
-0.5846	-0.00086022		-0.5996	-0.00134
-0.5844	-0.000904169		-0.5994	0.00049773
-0.5842	-0.000948119		-0.5992	0.00121
-0.584	0.000265766		-0.599	0.00197
-0.5838	0.000454749		-0.5988	0.00159
-0.5836	0.000652522		-0.5986	0.00105
-0.5834	0.000859084		-0.5984	0.00148
-0.5832	0.00107		-0.5982	0.000776802
-0.583	4.07448e-05		-0.598	8.66672e-05
-0.5828	4.07448e-05		-0.5978	-0.000387302
-0.5826	4.07448e-05		-0.5976	0.000306044
-0.5824	4.07448e-05		-0.5974	-0.000167757
-0.5822	4.07448e-05		-0.5972	0.000309443
-0.582	4.07448e-05		-0.597	0.000778484
-0.5818	4.07448e-05		-0.5968	0.00124
-0.5816	4.07448e-05		-0.5966	0.00169
-0.5814	4.07448e-05		-0.5964	0.00214
-0.5812	4.07448e-05		-0.5962	0.00257
-0.581	4.07448e-05		-0.596	0.003
-0.5808	4.07448e-05		-0.5958	0.00225
-0.5806	4.07448e-05		-0.5956	0.00245
-0.5804	4.07448e-05		-0.5954	0.00263
-0.5802	4.07448e-05		-0.5952	0.00279
-0.58	4.07448e-05		-0.595	0.00294
-0.5798	4.07448e-05		-0.5948	0.00307
-0.5796	4.07448e-05		-0.5946	0.00318
-0.5794	4.07448e-05		-0.5944	0.00328
-0.5792	0.00107		-0.5942	0.00336
-0.579	0.000859084		-0.594	0.00343
-0.5788	0.000652522		-0.5938	0.00348
-0.5786	0.000454749		-0.5936	0.00447
-0.5784	0.000265766		-0.5934	0.00429
-0.5782	0.00112		-0.5932	0.00409
-0.578	0.00177		-0.593	0.00485
-0.5778	0.00118		-0.5928	0.00445
-0.5776	0.000623515		-0.5926	0.00404
-0.5774	9.17262e-05		-0.5924	0.00363
-0.5772	-0.000413693		-0.5922	0.00322
-0.577	-0.000892742		-0.592	0.00281
-0.5768	-0.00135		-0.5918	0.00337
-0.5766	-0.00177		-0.5916	0.00276
-0.5764	-0.00217		-0.5914	0.00216
-0.5762	-0.00151		-0.5912	0.00157
-0.576	-0.00207		-0.591	0.000984202
-0.5758	-0.0026		-0.5908	0.000409144
-0.5756	-0.00309		-0.5906	-0.000157762
-0.5754	-0.00252		-0.5904	-0.000716515
-0.5752	-0.00315		-0.5902	-0.00127
-0.575	-0.00375		-0.59	0.000316915
-0.5748	-0.0043		-0.5898	0.000758125
-0.5746	-0.0048		-0.5896	6.48145e-05
-0.5744	-0.00526		-0.5894	-0.000595874
-0.5742	-0.00568		-0.5892	-0.00239
-0.574	-0.00606		-0.589	-0.0032
-0.5738	-0.00638		-0.5888	-0.00399
-0.5736	-0.00667		-0.5886	-0.00475
-0.5734	-0.00691		-0.5884	-0.00549
-0.5732	-0.00711		-0.5882	-0.0062
-0.573	-0.00726		-0.588	-0.00689
-0.5728	-0.00737		-0.5878	-0.00639
-0.5726	-0.00744		-0.5876	-0.00565
-0.5724	-0.00746		-0.5874	-0.00582
-0.5722	-0.00744		-0.5872	-0.00596
-0.572	-0.00737		-0.587	-0.00605
-0.5718	-0.00726		-0.5868	-0.0061
-0.5716	-0.00711		-0.5866	-0.00612
-0.5714	-0.00691		-0.5864	-0.00609
-0.5712	-0.00667		-0.5862	-0.00602
-0.571	-0.00638		-0.586	-0.00591
-0.5708	-0.00606		-0.5858	-0.0048
-0.5706	-0.00568		-0.5856	-0.00481
-0.5704	-0.00526		-0.5854	-0.00477
-0.5702	-0.0048		-0.5852	-0.00468
-0.57	-0.0043		-0.585	-0.00454
-0.5698	-0.00375		-0.5848	-0.00435
-0.5696	-0.00315		-0.5846	-0.00411
-0.5694	-0.00252		-0.5844	-0.00383
-0.5692	-0.00184		-0.5842	-0.00349
-0.569	-0.00237		-0.584	-0.00311
-0.5688	-0.00183		-0.5838	-0.00268
-0.5686	-0.00126		-0.5836	-0.0022
-0.5684	-0.000654536		-0.5834	-0.00283
-0.5682	-1.28736e-05		-0.5832	-0.00247
-0.568	-0.000593886		-0.583	-0.00207
-0.5678	-0.00137		-0.5828	-0.00279
-0.5676	-0.0011		-0.5826	-0.00252
-0.5674	-0.000810117		-0.5824	-0.00222
-0.5672	-0.000502471		-0.5822	-0.00188
-0.567	-0.000177245		-0.582	-0.00152
-0.5668	0.000165561		-0.5818	-0.00112
-0.5666	0.000525947		-0.5816	-0.00185
-0.5664	0.000903913		-0.5814	-0.0016
-0.5662	0.0013		-0.5812	-0.00133
-0.566	0.000454749		-0.581	-0.00103
-0.5658	0.000652522		-0.5808	-0.000710978
-0.5656	0.00189		-0.5806	-0.000364342
-0.5654	0.00189		-0.5804	6.76241e-06
-0.5652	0.00169		-0.5802	0.000402335
-0.565	0.00127		-0.58	0.000822376
-0.5648	0.000877543		-0.5798	9.97424e-05
-0.5646	0.000499578		-0.5796	-0.00081456
-0.5644	0.000139192		-0.5794	-0.000761546
-0.5642	-0.000203614		-0.5792	-0.000700375
-0.564	-0.000528841		-0.579	0.000328114
-0.5638	0.000197205		-0.5788	0.000205772
-0.5636	0.000725478		-0.5786	9.97424e-05
-0.5634	0.00106		-0.5784	1.00249e-05
-0.5632	0.000190173		-0.5782	-6.33804e-05
-0.563	0.00039322		-0.578	-0.000120473
-0.5628	-0.000608829		-0.5778	-0.000161254
-0.5626	-0.00156		-0.5776	-0.000185722
-0.5624	-0.00245		-0.5774	-0.000193879
-0.5622	-0.0033		-0.5772	-0.000185722
-0.562	-0.00409		-0.577	-0.000161254
-0.5618	-0.00483		-0.5768	-0.000120473
-0.5616	-0.00448		-0.5766	-6.33804e-05
-0.5614	-0.00533		-0.5764	1.00249e-05
-0.5612	-0.00611		-0.5762	9.97424e-05
-0.561	-0.00684		-0.576	0.000205772
-0.5608	-0.0075		-0.5758	0.00129
-0.5606	-0.00811		-0.5756	5.89617e-05
-0.5604	-0.00865		-0.5754	-0.000193879
-0.5602	-0.00913		-0.5752	0.000528755
-0.56	-0.00954		-0.575	0.000108714
-0.5598	-0.0099		-0.5748	-0.000286858
-0.5596	-0.00916		-0.5746	0.000301199
-0.5594	-0.00961		-0.5744	-0.000245262
-0.5592	-0.00999		-0.5742	-0.000759099
-0.559	-0.01029		-0.574	-0.00124
-0.5588	-0.01053		-0.5738	-0.000729737
-0.5586	-0.0107		-0.5736	-0.00135
-0.5584	-0.01079		-0.5734	-0.00192
-0.5582	-0.01082		-0.5732	-0.00245
-0.558	-0.00974		-0.573	-0.00295
-0.5578	-0.00984		-0.5728	-0.0034
-0.5576	-0.00987		-0.5726	-0.00381
-0.5574	-0.00981		-0.5724	-0.00418
-0.5572	-0.00967		-0.5722	-0.00451
-0.557	-0.00946		-0.572	-0.0048
-0.5568	-0.00916		-0.5718	-0.00505
-0.5566	-0.00879		-0.5716	-0.00526
-0.5564	-0.00834		-0.5714	-0.00543
-0.5562	-0.00781		-0.5712	-0.00555
-0.556	-0.00719		-0.571	-0.00564
-0.5558	-0.0065		-0.5708	-0.00568
-0.5556	-0.00574		-0.5706	-0.00569
-0.5554	-0.00614		-0.5704	-0.00565
-0.5552	-0.00545		-0.5702	-0.00557
-0.555	-0.00594		-0.57	-0.00546
-0.5548	-0.00534		-0.5698	-0.0053
-0.5546	-0.00468		-0.5696	-0.0051
-0.5544	-0.00395		-0.5694	-0.00486
-0.5542	-0.00317		-0.5692	-0.00458
-0.554	-0.00232		-0.569	-0.00425
-0.5538	-0.00244		-0.5688	-0.00602
-0.5536	-0.00251		-0.5686	-0.00563
-0.5534	-0.00276		-0.5684	-0.00522
-0.5532	-0.0032		-0.5682	-0.00478
-0.553	-0.00155		-0.568	-0.00336
-0.5528	-0.00238		-0.5678	-0.00308
-0.5526	-0.00215		-0.5676	-0.00276
-0.5524	-0.00189		-0.5674	-0.00241
-0.5522	-0.0016		-0.5672	-0.00202
-0.552	-0.00129		-0.567	-0.00161
-0.5518	-0.000949877		-0.5668	-0.00212
-0.5516	-0.000585096		-0.5666	-0.00144
-0.5514	-0.00145		-0.5664	-0.00169
-0.5512	-0.00127		-0.5662	-0.000760751
-0.551	-0.00107		-0.566	0.00018543
-0.5508	0.000188415		-0.5658	0.00115
-0.5506	0.00021039		-0.5656	0.000959574
-0.5504	0.000258734		-0.5654	0.00174
-0.5502	0.000333448		-0.5652	0.00253
-0.55	0.000434532		-0.565	0.00119
-0.5498	0.000561986		-0.5648	0.00198
-0.5496	0.000715809		-0.5646	0.0018
-0.5494	-0.000361833		-0.5644	0.0016
-0.5492	-0.000388202		-0.5642	0.00234
-0.549	-0.000396992		-0.564	0.00306
-0.5488	-0.000388202		-0.5638	0.00375
-0.5486	-0.000361833		-0.5636	0.00324
-0.5484	-0.000317883		-0.5634	0.00367
-0.5482	0.000777338		-0.5632	0.00406
-0.548	0.000641095		-0.563	0.00442
-0.5478	-0.000726613		-0.5628	0.00474
-0.5476	-0.00104		-0.5626	0.00504
-0.5474	-0.00134		-0.5624	0.0053
-0.5472	-0.00162		-0.5622	0.00553
-0.547	-0.00189		-0.562	0.00572
-0.5468	-0.00213		-0.5618	0.00589
-0.5466	-0.00236		-0.5616	0.00602
-0.5464	-0.00257		-0.5614	0.00612
-0.5462	-0.00277		-0.5612	0.00618
-0.546	-0.00294		-0.561	0.00621
-0.5458	-0.0031		-0.5608	0.00621
-0.5456	-0.00221		-0.5606	0.00618
-0.5454	-0.00255		-0.5604	0.00612
-0.5452	-0.00286		-0.5602	0.00698
-0.545	-0.00211		-0.56	0.00761
-0.5448	-0.00258		-0.5598	0.00705
-0.5446	-0.00302		-0.5596	0.00648
-0.5444	-0.00239		-0.5594	0.00589
-0.5442	-0.00194		-0.5592	0.00529
-0.544	-0.0027		-0.559	0.00467
-0.5438	-0.0034		-0.5588	0.00403
-0.5436	-0.0028		-0.5586	0.00455
-0.5434	-0.00316		-0.5584	0.00409
-0.5432	-0.00346		-0.5582	0.00459
-0.543	-0.00371		-0.558	0.00392
-0.5428	-0.00514		-0.5578	0.00209
-0.5426	-0.0055		-0.5576	0.0012
-0.5424	-0.00579		-0.5574	0.000309591
-0.5422	-0.00604		-0.5572	-0.000591746
-0.542	-0.00623		-0.557	-0.000542081
-0.5418	-0.00638		-0.5568	-0.00166
-0.5416	-0.00646		-0.5566	-0.00161
-0.5414	-0.0065		-0.5564	-0.00155
-0.5412	-0.00648		-0.5562	-0.000518413
-0.541	-0.00641		-0.556	-0.000619595
-0.5408	-0.00629		-0.5558	-0.00185
-0.5406	-0.00737		-0.5556	-0.00303
-0.5404	-0.00737		-0.5554	-0.00418
-0.5402	-0.00733		-0.5552	-0.00529
-0.54	-0.00725		-0.555	-0.00635
-0.5398	-0.00712		-0.5548	-0.00621
-0.5396	-0.00592		-0.5546	-0.00697
-0.5394	-0.00592		-0.5544	-0.00652
-0.5392	-0.00587		-0.5542	-0.00698
-0.539	-0.00473		-0.554	-0.00737
-0.5388	-0.00478		-0.5538	-0.00771
-0.5386	-0.00478		-0.5536	-0.00799
-0.5384	-0.00471		-0.5534	-0.00917
-0.5382	-0.00459		-0.5532	-0.00914
-0.538	-0.00565		-0.553	-0.00906
-0.5378	-0.0046		-0.5528	-0.00893
-0.5376	-0.00475		-0.5526	-0.00875
-0.5374	-0.00483		-0.5524	-0.00852
-0.5372	-0.00485		-0.5522	-0.00824
-0.537	-0.00481		-0.552	-0.00792
-0.5368	-0.00471		-0.5518	-0.00754
-0.5366	-0.00455		-0.5516	-0.00712
-0.5364	-0.00433		-0.5514	-0.00665
-0.5362	-0.00404		-0.5512	-0.00708
-0.536	-0.00369		-0.551	-0.00631
-0.5358	-0.00328		-0.5508	-0.0055
-0.5356	-0.00281		-0.5506	-0.00465
-0.5354	-0.00354		-0.5504	-0.00376
-0.5352	-0.00318		-0.5502	-0.00282
-0.535	-0.00277		-0.55	-0.00301
-0.5348	-0.00356		-0.5498	-0.00434
-0.5346	-0.00224		-0.5496	-0.00353
-0.5344	-0.00213		-0.5494	-0.00269
-0.5342	-0.00322		-0.5492	-0.00185
-0.534	-0.00449		-0.549	-0.000980625
-0.5338	-0.00469		-0.5488	-9.97181e-05
-0.5336	-0.00486		-0.5486	0.000797498
-0.5334	-0.00499		-0.5484	0.000751717
-0.5332	-0.00508		-0.5482	0.00188
-0.533	-0.00411		-0.548	0.00185
-0.5328	-0.00435		-0.5478	0.00278
-0.5326	-0.00455		-0.5476	0.00275
-0.5324	-0.00367		-0.5474	0.00388
-0.5322	-0.004		-0.5472	0.005
-0.532	-0.00427		-0.547	0.00612
-0.5318	-0.00449		-0.5468	0.00606
-0.5316	-0.00466		-0.5466	0.00598
-0.5314	-0.00477		-0.5464	0.00704
-0.5312	-0.00483		-0.5462	0.00691
-0.531	-0.00484		-0.546	0.00655
-0.5308	-0.00376		-0.5458	0.00593
-0.5306	-0.00388		-0.5456	0.00622
-0.5304	-0.00394		-0.5454	0.00647
-0.5302	-0.00393		-0.5452	0.00666
-0.53	-0.00387		-0.545	0.00681
-0.5298	-0.00271		-0.5448	0.00787
-0.5296	-0.0017		-0.5446	0.00772
-0.5294	-0.0021		-0.5444	0.00753
-0.5292	-0.0016		-0.5442	0.00729
-0.529	-0.00125		-0.544	0.00702
-0.5288	-0.00227		-0.5438	0.00671
-0.5286	-0.0024		-0.5436	0.00635
-0.5284	-0.00264		-0.5434	0.00596
-0.5282	-0.00402		-0.5432	0.00669
-0.528	-0.00529		-0.543	0.00738
-0.5278	-0.00645		-0.5428	0.00689
-0.5276	-0.00875		-0.5426	0.00637
-0.5274	-0.00991		-0.5424	0.00583
-0.5272	-0.01096		-0.5422	0.00526
-0.527	-0.01191		-0.542	0.00467
-0.5268	-0.01276		-0.5418	0.00406
-0.5266	-0.01349		-0.5416	0.00342
-0.5264	-0.01413		-0.5414	0.00275
-0.5262	-0.01465		-0.5412	0.00206
-0.526	-0.01508		-0.541	0.00252
-0.5258	-0.01539		-0.5408	0.00199
-0.5256	-0.0156		-0.5406	0.00145
-0.5254	-0.01571		-0.5404	0.00186
-0.5252	-0.01571		-0.5402	0.00109
-0.525	-0.0156		-0.54	0.000309637
-0.5248	-0.01539		-0.5398	-0.000477508
-0.5246	-0.01508		-0.5396	-0.000105497
-0.5244	-0.01591		-0.5394	-0.000692794
-0.5242	-0.01562		-0.5392	-0.00128
-0.524	-0.01523		-0.539	-0.00187
-0.5238	-0.01474		-0.5388	-0.00245
-0.5236	-0.01415		-0.5386	-0.00304
-0.5234	-0.01347		-0.5384	-0.00363
-0.5232	-0.01269		-0.5382	-0.00305
-0.523	-0.01182		-0.538	-0.00342
-0.5228	-0.01211		-0.5378	-0.00378
-0.5226	-0.01127		-0.5376	-0.00414
-0.5224	-0.01035		-0.5374	-0.00332
-0.5222	-0.0106		-0.5372	-0.00344
-0.522	-0.00973		-0.537	-0.00355
-0.5218	-0.00879		-0.5368	-0.00364
-0.5216	-0.00776		-0.5366	-0.00371
-0.5214	-0.00666		-0.5364	-0.0026
-0.5212	-0.00548		-0.5362	-0.00242
-0.521	-0.00421		-0.536	-0.00222
-0.5208	-0.00287		-0.5358	-0.002
-0.5206	-0.00271		-0.5356	-0.00175
-0.5204	-0.00145		-0.5354	-0.00148
-0.5202	-0.000110441		-0.5352	-0.00118
-0.52	0.0013		-0.535	-0.000857788
-0.5198	0.00277		-0.5348	-0.000511152
-0.5196	0.00306		-0.5346	-0.00131
-0.5194	0.00422		-0.5344	-0.00113
-0.5192	0.00396		-0.5342	-0.000932009
-0.519	0.00353		-0.534	-0.000719949
-0.5188	0.00292		-0.5338	-0.000491577
-0.5186	0.00212		-0.5336	-0.000246893
-0.5184	0.00112		-0.5334	1.41029e-05
-0.5182	-8.58297e-05		-0.5332	0.000291412
-0.518	-0.000248443		-0.533	0.000585032
-0.5178	-0.000402266		-0.5328	-0.000272177
-0.5176	-0.000547299		-0.5326	-0.00016207
-0.5174	-0.000683543		-0.5324	-4.38056e-05
-0.5172	0.000222696		-0.5322	8.26145e-05
-0.517	-0.00011132		-0.532	0.000217191
-0.5168	-0.000427757		-0.5318	0.000359923
-0.5166	-0.000726613		-0.5316	0.000510812
-0.5164	-0.00101		-0.5314	0.000669856
-0.5162	-0.00127		-0.5312	-0.000122248
-0.516	-0.00152		-0.531	0.000252964
-0.5158	-0.00175		-0.5308	0.000628175
-0.5156	-0.00196		-0.5306	0.001
-0.5154	-0.00215		-0.5304	0.00138
-0.5152	-0.00233		-0.5302	0.000586657
-0.515	-0.00248		-0.53	0.000745726
-0.5148	-0.00263		-0.5298	0.000896637
-0.5146	-0.00275		-0.5296	0.00104
-0.5144	-0.00285		-0.5294	0.00117
-0.5142	-0.00191		-0.5292	0.0013
-0.514	-0.00116		-0.529	0.00142
-0.5138	-0.00163		-0.5288	0.00153
-0.5136	-0.00104		-0.5286	0.00163
-0.5134	-0.00166		-0.5284	0.00172
-0.5132	-0.00224		-0.5282	0.00181
-0.513	-0.00277		-0.528	0.00285
-0.5128	-0.00326		-0.5278	0.00272
-0.5126	-0.0037		-0.5276	0.00259
-0.5124	-0.0041		-0.5274	0.00246
-0.5122	-0.00446		-0.5272	0.00232
-0.512	-0.00477		-0.527	0.00219
-0.5118	-0.00504		-0.5268	0.00206
-0.5116	-0.00526		-0.5266	0.00193
-0.5114	-0.00544		-0.5264	0.0018
-0.5112	-0.00558		-0.5262	0.00167
-0.511	-0.00463		-0.526	0.0025
-0.5108	-0.0049		-0.5258	0.00217
-0.5106	-0.00511		-0.5256	0.00281
-0.5104	-0.00527		-0.5254	0.00229
-0.5102	-0.00434		-0.5252	0.00276
-0.51	-0.00357		-0.525	0.00303
-0.5098	-0.004		-0.5248	0.00314
-0.5096	-0.00435		-0.5246	0.00307
-0.5094	-0.00463		-0.5244	0.00285
-0.5092	-0.0061		-0.5242	0.00247
-0.509	-0.00647		-0.524	0.000997897
-0.5088	-0.00575		-0.5238	-0.000413128
-0.5086	-0.00622		-0.5236	-0.000799744
-0.5084	-0.00661		-0.5234	-0.00228
-0.5082	-0.00694		-0.5232	-0.00369
-0.508	-0.00719		-0.523	-0.00502
-0.5078	-0.00738		-0.5228	-0.00532
-0.5076	-0.00749		-0.5226	-0.00671
-0.5074	-0.00753		-0.5224	-0.00801
-0.5072	-0.00751		-0.5222	-0.00924
-0.507	-0.00867		-0.522	-0.01038
-0.5068	-0.00873		-0.5218	-0.01144
-0.5066	-0.00874		-0.5216	-0.01242
-0.5064	-0.00868		-0.5214	-0.01331
-0.5062	-0.00856		-0.5212	-0.01413
-0.506	-0.00838		-0.521	-0.0137
-0.5058	-0.00814		-0.5208	-0.01413
-0.5056	-0.00784		-0.5206	-0.01448
-0.5054	-0.00851		-0.5204	-0.01474
-0.5052	-0.00786		-0.5202	-0.0149
-0.505	-0.00717		-0.52	-0.01498
-0.5048	-0.00642		-0.5198	-0.01497
-0.5046	-0.00562		-0.5196	-0.01487
-0.5044	-0.00477		-0.5194	-0.01468
-0.5042	-0.00387		-0.5192	-0.01439
-0.504	-0.00417		-0.519	-0.01402
-0.5038	-0.00465		-0.5188	-0.01356
-0.5036	-0.00406		-0.5186	-0.01301
-0.5034	-0.00469		-0.5184	-0.01237
-0.5032	-0.00426		-0.5182	-0.01164
-0.503	-0.00381		-0.518	-0.01178
-0.5028	-0.00333		-0.5178	-0.01184
-0.5026	-0.00283		-0.5176	-0.01086
-0.5024	-0.00229		-0.5174	-0.00982
-0.5022	-0.00174		-0.5172	-0.0087
-0.502	-0.00115		-0.517	-0.00846
-0.5018	-0.000541147		-0.5168	-0.00795
-0.5016	9.61212e-05		-0.5166	-0.00718
-0.5014	0.000759759		-0.5164	-0.00519
-0.5012	0.00145		-0.5162	-0.00411
-0.501	0.00217		-0.516	-0.00182
-0.5008	0.00165		-0.5158	-0.000657134
-0.5006	0.00219		-0.5156	0.0015
-0.5004	0.00274		-0.5154	0.00252
-0.5002	0.00331		-0.5152	0.00452
-0.5	0.00264		-0.515	0.00538
-0.4998	0.00176		-0.5148	0.00605
-0.4996	0.00191		-0.5146	0.00651
-0.4994	0.00206		-0.5144	0.00677
-0.4992	0.00221		-0.5142	0.00682
-0.499	0.00236		-0.514	0.00664
-0.4988	0.00251		-0.5138	0.00739
-0.4986	0.00243		-0.5136	0.00812
-0.4984	0.00213		-0.5134	0.00766
-0.4982	0.00183		-0.5132	0.00813
-0.498	0.00154		-0.513	0.00856
-0.4978	0.00124		-0.5128	0.00896
-0.4976	0.00197		-0.5126	0.00816
-0.4974	0.00146		-0.5124	0.00732
-0.4972	0.000951378		-0.5122	0.00759
-0.497	0.000454749		-0.512	0.00878
-0.4968	0.001		-0.5118	0.00876
-0.4966	0.0003062		-0.5116	0.0087
-0.4964	-0.000370622		-0.5114	0.0086
-0.4962	-0.00103		-0.5112	0.00846
-0.496	-0.00167		-0.511	0.00827
-0.4958	-0.0023		-0.5108	0.00805
-0.4956	-0.0029		-0.5106	0.00778
-0.4954	-0.00349		-0.5104	0.00748
-0.4952	-0.0028		-0.5102	0.00713
-0.495	-0.00313		-0.51	0.00674
-0.4948	-0.00342		-0.5098	0.00631
-0.4946	-0.00369		-0.5096	0.00585
-0.4944	-0.00393		-0.5094	0.00534
-0.4942	-0.00415		-0.5092	0.00478
-0.494	-0.00433		-0.509	0.00419
-0.4938	-0.0045		-0.5088	0.00356
-0.4936	-0.00463		-0.5086	0.00289
-0.4934	-0.00474		-0.5084	0.00217
-0.4932	-0.00483		-0.5082	0.00142
-0.493	-0.00385		-0.508	0.000624404
-0.4928	-0.0041		-0.5078	-3.70671e-06
-0.4926	-0.00431		-0.5076	-0.000464593
-0.4924	-0.00448		-0.5074	-0.000966268
-0.4922	-0.00462		-0.5072	-0.00151
-0.492	-0.00473		-0.507	-0.00209
-0.4918	-0.0048		-0.5068	-0.00155
-0.4916	-0.0038		-0.5066	-0.00083004
-0.4914	-0.00402		-0.5064	0.00103
-0.4912	-0.00419		-0.5062	0.000758077
-0.491	-0.00431		-0.506	0.0026
-0.4908	-0.0044		-0.5058	0.00233
-0.4906	-0.00444		-0.5056	0.00206
-0.4904	-0.00443		-0.5054	0.00181
-0.4902	-0.00438		-0.5052	0.00156
-0.49	-0.00429		-0.505	0.00132
-0.4898	-0.00416		-0.5048	0.00109
-0.4896	-0.00294		-0.5046	0.000861833
-0.4894	-0.00293		-0.5044	0.000645688
-0.4892	-0.00184		-0.5042	0.000437697
-0.489	-0.00194		-0.504	0.000237859
-0.4888	-0.00198		-0.5038	4.61753e-05
-0.4886	-0.00196		-0.5036	-0.000137355
-0.4884	-0.00313		-0.5034	-0.000312731
-0.4882	-0.00322		-0.5032	-0.000479954
-0.488	-0.00325		-0.503	-0.000639023
-0.4878	-0.00324		-0.5028	-0.000789939
-0.4876	-0.00317		-0.5026	-0.000932701
-0.4874	-0.0043		-0.5024	-0.00203
-0.4872	-0.00436		-0.5022	-0.000785895
-0.487	-0.00437		-0.502	-0.000496328
-0.4868	-0.00434		-0.5018	-0.00137
-0.4866	-0.00552		-0.5016	-0.00128
-0.4864	-0.00564		-0.5014	-0.00119
-0.4862	-0.00572		-0.5012	-0.0011
-0.486	-0.00576		-0.501	-0.00101
-0.4858	-0.00577		-0.5008	-0.000917089
-0.4856	-0.00574		-0.5006	-0.000827364
-0.4854	-0.00568		-0.5004	-0.000737642
-0.4852	-0.00559		-0.5002	-0.000647922
-0.485	-0.00545		-0.5	-0.000558204
-0.4848	-0.00529		-0.4998	-0.00143
-0.4846	-0.00508		-0.4996	-0.00114
-0.4844	-0.00485		-0.4994	-0.000856819
-0.4842	-0.00457		-0.4992	-0.00154
-0.484	-0.00427		-0.499	-0.00108
-0.4838	-0.00392		-0.4988	-0.000629305
-0.4836	-0.00355		-0.4986	-0.00116
-0.4834	-0.00313		-0.4984	-0.000540454
-0.4832	-0.00269		-0.4982	5.09193e-05
-0.483	-0.0022		-0.498	0.000617818
-0.4828	-0.00294		-0.4978	0.00116
-0.4826	-0.00262		-0.4976	0.00189
-0.4824	-0.00227		-0.4974	0.0028
-0.4822	-0.0019		-0.4972	0.00368
-0.482	-0.0015		-0.497	0.00454
-0.4818	-0.00107		-0.4968	0.00538
-0.4816	-0.000620256		-0.4966	0.00523
-0.4814	-0.0014		-0.4964	0.00526
-0.4812	-0.00113		-0.4962	0.00524
-0.481	-0.000836487		-0.496	0.00614
-0.4808	-0.000528841		-0.4958	0.00582
-0.4806	-0.000203614		-0.4956	0.00641
-0.4804	0.000139192		-0.4954	0.00693
-0.4802	0.000499578		-0.4952	0.0074
-0.48	0.000877543		-0.495	0.00781
-0.4798	0.00127		-0.4948	0.00817
-0.4796	0.00169		-0.4946	0.00847
-0.4794	0.000859084		-0.4944	0.00871
-0.4792	0.00107		-0.4942	0.00889
-0.479	4.07448e-05		-0.494	0.00902
-0.4788	4.07448e-05		-0.4938	0.00909
-0.4786	4.07448e-05		-0.4936	0.0091
-0.4784	4.07448e-05		-0.4934	0.00905
-0.4782	4.07448e-05		-0.4932	0.00895
-0.478	4.07448e-05		-0.493	0.00879
-0.4778	4.07448e-05		-0.4928	0.00858
-0.4776	4.07448e-05		-0.4926	0.0083
-0.4774	4.07448e-05		-0.4924	0.00797
-0.4772	4.07448e-05		-0.4922	0.00875
-0.477	4.07448e-05		-0.492	0.00948
-0.4768	0.00107		-0.4918	0.00901
-0.4766	0.00189		-0.4916	0.00849
-0.4764	0.00147		-0.4914	0.00793
-0.4762	0.00107		-0.4912	0.00829
-0.476	0.00067977		-0.491	0.00745
-0.4758	0.000310595		-0.4908	0.00658
-0.4756	-4.10012e-05		-0.4906	0.00567
-0.4754	-0.000375017		-0.4904	0.00473
-0.4752	-0.000691454		-0.4902	0.00376
-0.475	4.33818e-05		-0.49	0.00276
-0.4748	-0.000453248		-0.4898	0.00172
-0.4746	-0.000923507		-0.4896	0.00182
-0.4744	-0.00137		-0.4894	0.000936025
-0.4742	-0.00178		-0.4892	0.000985674
-0.474	-0.00218		-0.489	0.00102
-0.4738	-0.00254		-0.4888	8.52187e-05
-0.4736	-0.00288		-0.4886	-0.000856903
-0.4734	-0.00319		-0.4884	-0.000639868
-0.4732	-0.00348		-0.4882	-0.00138
-0.473	-0.00374		-0.488	-0.00212
-0.4728	-0.00397		-0.4878	-0.00287
-0.4726	-0.00418		-0.4876	-0.00361
-0.4724	-0.00436		-0.4874	-0.00318
-0.4722	-0.00451		-0.4872	-0.00371
-0.472	-0.00464		-0.487	-0.00423
-0.4718	-0.00474		-0.4868	-0.00474
-0.4716	-0.00481		-0.4866	-0.00524
-0.4714	-0.00486		-0.4864	-0.00457
-0.4712	-0.00488		-0.4862	-0.00367
-0.471	-0.00488		-0.486	-0.0037
-0.4708	-0.00485		-0.4858	-0.00372
-0.4706	-0.00479		-0.4856	-0.0037
-0.4704	-0.00471		-0.4854	-0.00367
-0.4702	-0.0046		-0.4852	-0.00361
-0.47	-0.00446		-0.485	-0.00352
-0.4698	-0.0043		-0.4848	-0.00341
-0.4696	-0.00411		-0.4846	-0.00328
-0.4694	-0.00389		-0.4844	-0.00312
-0.4692	-0.00469		-0.4842	-0.00293
-0.469	-0.0042		-0.484	-0.00273
-0.4688	-0.0037		-0.4838	-0.00249
-0.4686	-0.00318		-0.4836	-0.00224
-0.4684	-0.00265		-0.4834	-0.00195
-0.4682	-0.00209		-0.4832	-0.00165
-0.468	-0.000488407		-0.483	-0.00132
-0.4678	-0.000114836		-0.4828	-0.000963818
-0.4676	0.000285104		-0.4826	-0.000584557
-0.4674	0.000711414		-0.4824	-0.000180829
-0.4672	0.00116		-0.4822	0.000247368
-0.467	0.00164		-0.482	0.000700034
-0.4668	0.00215		-0.4818	1.00249e-05
-0.4666	0.00142		-0.4816	-0.000663816
-0.4664	0.000489909		-0.4814	-0.000162184
-0.4662	0.000599782		-0.4812	0.000347604
-0.466	0.000718446		-0.481	-0.000301597
-0.4658	0.0008459		-0.4808	8.36231e-06
-0.4656	0.000982143		-0.4806	0.000318321
-0.4654	0.00113		-0.4804	0.000628278
-0.4652	0.00128		-0.4802	0.000938233
-0.465	0.00144		-0.48	0.00125
-0.4648	0.000357181		-0.4798	0.00156
-0.4646	0.000304442		-0.4796	0.00187
-0.4644	0.000251702		-0.4794	0.00218
-0.4642	0.000198963		-0.4792	0.00249
-0.464	0.00118		-0.479	0.00163
-0.4638	0.000911824		-0.4788	0.00172
-0.4636	0.00169		-0.4786	0.00181
-0.4634	0.00225		-0.4784	0.00189
-0.4632	0.00159		-0.4782	0.00196
-0.463	0.000953136		-0.478	0.00202
-0.4628	0.000342238		-0.4778	0.00207
-0.4626	-0.00024229		-0.4776	0.00212
-0.4624	-0.000800449		-0.4774	0.00215
-0.4622	-0.00133		-0.4772	0.00218
-0.462	-0.00184		-0.477	0.0022
-0.4618	-0.00232		-0.4768	0.00317
-0.4616	-0.00277		-0.4766	0.00298
-0.4614	-0.00216		-0.4764	0.00278
-0.4612	-0.00278		-0.4762	0.00259
-0.461	-0.00336		-0.476	0.00239
-0.4608	-0.0039		-0.4758	0.00219
-0.4606	-0.00441		-0.4756	0.002
-0.4604	-0.00489		-0.4754	0.0018
-0.4602	-0.00533		-0.4752	0.00161
-0.46	-0.00573		-0.475	0.00141
-0.4598	-0.0061		-0.4748	0.00217
-0.4596	-0.00643		-0.4746	0.00178
-0.4594	-0.00673		-0.4744	0.00139
-0.4592	-0.007		-0.4742	0.00101
-0.459	-0.00597		-0.474	0.000641445
-0.4588	-0.00593		-0.4738	0.00027848
-0.4586	-0.00584		-0.4736	-7.63294e-05
-0.4584	-0.00572		-0.4734	-0.000422984
-0.4582	-0.00555		-0.4732	0.000197678
-0.458	-0.00533		-0.473	-0.000332493
-0.4578	-0.00633		-0.4728	0.00011281
-0.4576	-0.00626		-0.4726	-0.000584564
-0.4574	-0.00615		-0.4724	-0.000298308
-0.4572	-0.00601		-0.4722	-0.00115
-0.457	-0.00584		-0.472	-0.00196
-0.4568	-0.00563		-0.4718	-0.00275
-0.4566	-0.00435		-0.4716	-0.0035
-0.4564	-0.00428		-0.4714	-0.00305
-0.4562	-0.00417		-0.4712	-0.00352
-0.456	-0.00402		-0.471	-0.00394
-0.4558	-0.00382		-0.4708	-0.00433
-0.4556	-0.00358		-0.4706	-0.00468
-0.4554	-0.00329		-0.4704	-0.00498
-0.4552	-0.00296		-0.4702	-0.00525
-0.455	-0.00155		-0.47	-0.00547
-0.4548	-0.000317883		-0.4698	-0.00566
-0.4546	-0.000278329		-0.4696	-0.0058
-0.4544	-0.000177245		-0.4694	-0.0059
-0.4542	-1.46315e-05		-0.4692	-0.00596
-0.454	0.000209511		-0.469	-0.00694
-0.4538	-0.000762652		-0.4688	-0.00672
-0.4536	-0.000648383		-0.4686	-0.00647
-0.4534	-0.00174		-0.4684	-0.00618
-0.4532	-0.00301		-0.4682	-0.00586
-0.453	-0.00321		-0.468	-0.00647
-0.4528	-0.00338		-0.4678	-0.00589
-0.4526	-0.00351		-0.4676	-0.00528
-0.4524	-0.00361		-0.4674	-0.00465
-0.4522	-0.00367		-0.4672	-0.00399
-0.452	-0.0037		-0.467	-0.00331
-0.4518	-0.00369		-0.4668	-0.00261
-0.4516	-0.00364		-0.4666	-0.00304
-0.4514	-0.00356		-0.4664	-0.00251
-0.4512	-0.00471		-0.4662	-0.00195
-0.451	-0.00479		-0.466	-0.000421157
-0.4508	-0.00485		-0.4658	-3.37108e-05
-0.4506	-0.00488		-0.4656	0.00134
-0.4504	-0.00488		-0.4654	0.00157
-0.4502	-0.00486		-0.4652	0.00184
-0.45	-0.00481		-0.465	0.00214
-0.4498	-0.00474		-0.4648	0.00248
-0.4496	-0.00464		-0.4646	0.000719897
-0.4494	-0.00451		-0.4644	0.0011
-0.4492	-0.00436		-0.4642	0.0015
-0.449	-0.00418		-0.464	0.00192
-0.4488	-0.00397		-0.4638	0.00235
-0.4486	-0.00374		-0.4636	0.0028
-0.4484	-0.00348		-0.4634	0.00326
-0.4482	-0.00319		-0.4632	0.00375
-0.448	-0.00288		-0.463	0.00308
-0.4478	-0.00254		-0.4628	0.00337
-0.4476	-0.00218		-0.4626	0.00251
-0.4474	-0.00178		-0.4624	0.00261
-0.4472	-0.00137		-0.4622	0.00154
-0.447	-0.000923507		-0.462	0.00142
-0.4468	-0.000453248		-0.4618	0.0013
-0.4466	4.33818e-05		-0.4616	0.00212
-0.4464	-0.000691454		-0.4614	0.00178
-0.4462	-0.000375017		-0.4612	0.00144
-0.446	-4.10012e-05		-0.461	0.00109
-0.4458	0.000310595		-0.4608	0.000751065
-0.4456	0.00067977		-0.4606	0.00040848
-0.4454	0.00107		-0.4604	6.58906e-05
-0.4452	0.0025		-0.4602	-0.000276702
-0.445	0.00271		-0.46	-0.000619298
-0.4448	0.00169		-0.4598	-0.000961898
-0.4446	0.000454749		-0.4596	-0.0013
-0.4444	0.000265766		-0.4594	-0.000687947
-0.4442	8.55733e-05		-0.4592	-0.00123
-0.444	-8.58297e-05		-0.459	-0.00176
-0.4438	-0.000248443		-0.4588	-0.00112
-0.4436	-0.000402266		-0.4586	-0.00143
-0.4434	0.000486393		-0.4584	-0.00171
-0.4432	0.00117		-0.4582	-0.00198
-0.443	0.00061912		-0.458	-0.00223
-0.4428	9.61212e-05		-0.4578	-0.0013
-0.4426	-0.000400508		-0.4576	-0.00131
-0.4424	-0.000870768		-0.4574	-0.00129
-0.4422	-0.00131		-0.4572	-0.00124
-0.442	-0.00173		-0.457	-0.00117
-0.4418	-0.00212		-0.4568	-0.00108
-0.4416	-0.00145		-0.4566	-4.77296e-07
-0.4414	-0.00201		-0.4564	-5.75892e-05
-0.4412	-0.00253		-0.4562	-8.20778e-05
-0.441	-0.00301		-0.456	-7.39431e-05
-0.4408	-0.00346		-0.4558	-0.0012
-0.4406	-0.00387		-0.4556	-0.00134
-0.4404	-0.00425		-0.4554	-0.00263
-0.4402	-0.00459		-0.4552	-0.00294
-0.44	-0.0049		-0.455	-0.00323
-0.4398	-0.00517		-0.4548	-0.00351
-0.4396	-0.00541		-0.4546	-0.00377
-0.4394	-0.00561		-0.4544	-0.00285
-0.4392	-0.00578		-0.4542	-0.00286
-0.439	-0.00591		-0.454	-0.00285
-0.4388	-0.00601		-0.4538	-0.00281
-0.4386	-0.00607		-0.4536	-0.00275
-0.4384	-0.0061		-0.4534	-0.00266
-0.4382	-0.00609		-0.4532	-0.00255
-0.438	-0.00604		-0.453	-0.00242
-0.4378	-0.00596		-0.4528	-0.00226
-0.4376	-0.00585		-0.4526	-0.00208
-0.4374	-0.0057		-0.4524	-0.00187
-0.4372	-0.00552		-0.4522	-0.00164
-0.437	-0.0053		-0.452	-0.00138
-0.4368	-0.00504		-0.4518	-0.0011
-0.4366	-0.00475		-0.4516	-0.000792539
-0.4364	-0.00443		-0.4514	-0.00163
-0.4362	-0.00407		-0.4512	-0.00149
-0.436	-0.00367		-0.451	-0.00134
-0.4358	-0.00324		-0.4508	-0.00116
-0.4356	-0.00277		-0.4506	-0.000976868
-0.4354	-0.00227		-0.4504	-0.000772964
-0.4352	-0.00174		-0.4502	-0.000552749
-0.435	-0.00242		-0.45	-0.00128
-0.4348	-0.00308		-0.4498	-0.00178
-0.4346	-0.00143		-0.4496	-0.00208
-0.4344	-0.00102		-0.4494	-0.00122
-0.4342	-0.000571911		-0.4492	-0.00153
-0.434	-0.000101652		-0.449	-0.00090682
-0.4338	0.000394978		-0.4488	-0.000295035
-0.4336	0.000917977		-0.4486	0.000300435
-0.4334	0.00147		-0.4484	0.000879588
-0.4332	0.000785249		-0.4482	0.000483121
-0.433	-0.00010341		-0.448	0.00123
-0.4328	5.04137e-05		-0.4478	0.00195
-0.4326	0.000213027		-0.4476	0.00265
-0.4324	0.00038443		-0.4474	0.00332
-0.4322	-0.000469069		-0.4472	0.00397
-0.432	-6.4734e-05		-0.447	0.00459
-0.4318	0.000339601		-0.4468	0.00519
-0.4316	0.000743937		-0.4466	0.00577
-0.4314	-0.000109562		-0.4464	0.00515
-0.4312	6.18406e-05		-0.4462	0.00546
-0.431	0.000224454		-0.446	0.00574
-0.4308	0.000378277		-0.4458	0.00598
-0.4306	0.00156		-0.4456	0.0062
-0.4304	0.00148		-0.4454	0.00638
-0.4302	0.0014		-0.4452	0.00652
-0.43	0.00132		-0.445	0.00664
-0.4298	0.00124		-0.4448	0.00672
-0.4296	0.00116		-0.4446	0.00677
-0.4294	0.00108		-0.4444	0.00678
-0.4292	0.001		-0.4442	0.00677
-0.429	0.00092413		-0.444	0.00672
-0.4288	0.000845021		-0.4438	0.00664
-0.4286	0.000765912		-0.4436	0.00652
-0.4284	0.000686802		-0.4434	0.00638
-0.4282	0.000607693		-0.4432	0.0062
-0.428	0.000528584		-0.443	0.00694
-0.4278	0.000449475		-0.4428	0.00746
-0.4276	0.000370366		-0.4426	0.00679
-0.4274	0.000291257		-0.4424	0.0061
-0.4272	0.000212148		-0.4422	0.0054
-0.427	0.000133039		-0.442	0.00468
-0.4268	5.39297e-05		-0.4418	0.00395
-0.4266	-2.51794e-05		-0.4416	0.0032
-0.4264	-0.000104289		-0.4414	0.00243
-0.4262	-0.000183398		-0.4412	0.00261
-0.426	-0.000262507		-0.441	0.00161
-0.4258	-0.000341616		-0.4408	0.000603106
-0.4256	-0.000420725		-0.4406	0.000546738
-0.4254	-0.000499834		-0.4404	-0.000676777
-0.4252	-0.000578943		-0.4402	-0.000941136
-0.425	-0.000658052		-0.44	-0.00141
-0.4248	-0.000737161		-0.4398	-0.00185
-0.4246	0.000441564		-0.4396	-0.00207
-0.4244	-0.000662447		-0.4394	-0.00108
-0.4242	-0.000732766		-0.4392	-0.00218
-0.424	-0.000803086		-0.439	-0.00226
-0.4238	-0.000873405		-0.4388	-0.00346
-0.4236	-0.000943724		-0.4386	-0.00364
-0.4234	-0.00101		-0.4384	-0.00492
-0.4232	-0.00108		-0.4382	-0.00613
-0.423	-0.00115		-0.438	-0.00611
-0.4228	-0.00123		-0.4378	-0.00698
-0.4226	-0.0013		-0.4376	-0.00778
-0.4224	-0.00137		-0.4374	-0.0085
-0.4222	-0.00144		-0.4372	-0.00915
-0.422	-0.000248443		-0.437	-0.00972
-0.4218	-8.58297e-05		-0.4368	-0.01022
-0.4216	8.55733e-05		-0.4366	-0.01065
-0.4214	0.000265766		-0.4364	-0.01101
-0.4212	0.000454749		-0.4362	-0.01129
-0.421	0.000652522		-0.436	-0.0115
-0.4208	0.000859084		-0.4358	-0.01067
-0.4206	0.00107		-0.4356	-0.01093
-0.4204	4.07448e-05		-0.4354	-0.01111
-0.4202	4.07448e-05		-0.4352	-0.01121
-0.42	4.07448e-05		-0.435	-0.01123
-0.4198	4.07448e-05		-0.4348	-0.01116
-0.4196	4.07448e-05		-0.4346	-0.01101
-0.4194	4.07448e-05		-0.4344	-0.01079
-0.4192	4.07448e-05		-0.4342	-0.01048
-0.419	4.07448e-05		-0.434	-0.01008
-0.4188	4.07448e-05		-0.4338	-0.00961
-0.4186	4.07448e-05		-0.4336	-0.00906
-0.4184	0.00107		-0.4334	-0.00842
-0.4182	0.000859084		-0.4332	-0.0077
-0.418	0.000652522		-0.433	-0.0069
-0.4178	0.000454749		-0.4328	-0.00719
-0.4176	0.0013		-0.4326	-0.00761
-0.4174	0.000903913		-0.4324	-0.00701
-0.4172	0.000525947		-0.4322	-0.00634
-0.417	0.000165561		-0.432	-0.0056
-0.4168	-0.000177245		-0.4318	-0.00481
-0.4166	-0.000502471		-0.4316	-0.00394
-0.4164	-0.000810117		-0.4314	-0.00301
-0.4162	-6.6492e-05		-0.4312	-0.00202
-0.416	0.000479361		-0.431	-0.00212
-0.4158	0.000836231		-0.4308	-0.00121
-0.4156	-2.07845e-05		-0.4306	-0.00121
-0.4154	-0.00083385		-0.4304	-0.00115
-0.4152	-0.0016		-0.4302	-9.36432e-05
-0.415	-0.00233		-0.43	-0.000163758
-0.4148	-0.00301		-0.4298	-0.00137
-0.4146	-0.00365		-0.4296	-0.000430527
-0.4144	-0.00424		-0.4294	-0.000435512
-0.4142	-0.00479		-0.4292	-0.000432169
-0.414	-0.00529		-0.429	0.000530332
-0.4138	-0.00576		-0.4288	0.000325685
-0.4136	-0.00617		-0.4286	0.00107
-0.4134	-0.00655		-0.4284	0.000643094
-0.4132	-0.00688		-0.4282	0.00116
-0.413	-0.00716		-0.428	0.00165
-0.4128	-0.0074		-0.4278	0.00214
-0.4126	-0.0076		-0.4276	0.0026
-0.4124	-0.00776		-0.4274	0.00305
-0.4122	-0.00683		-0.4272	0.00348
-0.412	-0.00711		-0.427	0.0039
-0.4118	-0.00734		-0.4268	0.0043
-0.4116	-0.00752		-0.4266	0.00564
-0.4114	-0.00764		-0.4264	0.00581
-0.4112	-0.00771		-0.4262	0.00597
-0.411	-0.00773		-0.426	0.00612
-0.4108	-0.00769		-0.4258	0.00626
-0.4106	-0.00761		-0.4256	0.00523
-0.4104	-0.00643		-0.4254	0.00514
-0.4102	-0.00645		-0.4252	0.00407
-0.41	-0.00641		-0.425	0.00415
-0.4098	-0.00528		-0.4248	0.0042
-0.4096	-0.0043		-0.4246	0.00423
-0.4094	-0.0045		-0.4244	0.00424
-0.4092	-0.00461		-0.4242	0.00422
-0.409	-0.00362		-0.424	0.00417
-0.4088	-0.00276		-0.4238	0.0041
-0.4086	-0.00203		-0.4236	0.00401
-0.4084	-0.00245		-0.4234	0.00485
-0.4082	-0.00403		-0.4232	0.00451
-0.408	-0.00447		-0.423	0.00415
-0.4078	-0.00482		-0.4228	0.00473
-0.4076	-0.00507		-0.4226	0.0051
-0.4074	-0.00648		-0.4224	0.0043
-0.4072	-0.00677		-0.4222	0.0035
-0.407	-0.00697		-0.422	0.0027
-0.4068	-0.00709		-0.4218	0.0019
-0.4066	-0.00608		-0.4216	0.0011
-0.4064	-0.0052		-0.4214	0.000302362
-0.4062	-0.00547		-0.4212	-0.000496999
-0.406	-0.0069		-0.421	-0.0013
-0.4058	-0.00845		-0.4208	-0.0021
-0.4056	-0.01014		-0.4206	-0.0029
-0.4054	-0.01071		-0.4204	-0.00253
-0.4052	-0.01121		-0.4202	-0.00311
-0.405	-0.01163		-0.42	-0.00369
-0.4048	-0.01197		-0.4198	-0.00425
-0.4046	-0.01223		-0.4196	-0.00364
-0.4044	-0.01241		-0.4194	-0.00398
-0.4042	-0.01251		-0.4192	-0.00313
-0.404	-0.01253		-0.419	-0.00226
-0.4038	-0.01247		-0.4188	-0.00252
-0.4036	-0.01234		-0.4186	-0.00179
-0.4034	-0.01212		-0.4184	-0.00218
-0.4032	-0.01183		-0.4182	-0.00254
-0.403	-0.01145		-0.418	-0.00189
-0.4028	-0.011		-0.4178	-0.00236
-0.4026	-0.01047		-0.4176	-0.00279
-0.4024	-0.00986		-0.4174	-0.00316
-0.4022	-0.00917		-0.4172	-0.00349
-0.402	-0.00966		-0.417	-0.00377
-0.4018	-0.00904		-0.4168	-0.004
-0.4016	-0.00836		-0.4166	-0.00513
-0.4014	-0.0076		-0.4164	-0.00623
-0.4012	-0.00677		-0.4162	-0.00634
-0.401	-0.00588		-0.416	-0.00641
-0.4008	-0.00491		-0.4158	-0.00645
-0.4006	-0.00387		-0.4156	-0.00646
-0.4004	-0.00276		-0.4154	-0.00644
-0.4002	-0.00284		-0.4152	-0.00638
-0.4	-0.00183		-0.415	-0.00512
-0.3998	-0.000752983		-0.4148	-0.00478
-0.3996	-0.000872526		-0.4146	-0.0044
-0.3994	-0.00116		-0.4144	-0.00398
-0.3992	-0.000376775		-0.4142	-0.00352
-0.399	0.00045387		-0.414	-0.00302
-0.3988	7.06305e-05		-0.4138	-0.00248
-0.3986	-0.000501592		-0.4136	-0.0019
-0.3984	-0.00127		-0.4134	-0.00127
-0.3982	-0.00099031		-0.4132	-0.00177
-0.398	-0.000691454		-0.413	-0.00128
-0.3978	-0.000375017		-0.4128	-0.00076296
-0.3976	0.000992691		-0.4126	-0.00138
-0.3974	0.00216		-0.4124	-0.00217
-0.3972	0.00314		-0.4122	-0.00199
-0.397	0.00291		-0.412	-0.0018
-0.3968	0.00376		-0.4118	-0.00158
-0.3966	0.00443		-0.4116	-0.00136
-0.3964	0.00265		-0.4114	-0.00111
-0.3962	0.000695592		-0.4112	0.00010895
-0.396	-0.000179003		-0.411	0.00018643
-0.3958	2.4044e-05		-0.4108	0.000288378
-0.3956	5.56876e-05		-0.4106	0.000414792
-0.3954	-7.52819e-05		-0.4104	0.00152
-0.3952	-0.00139		-0.4102	0.0015
-0.395	-0.00161		-0.41	0.00151
-0.3948	-0.00197		-0.4098	0.00155
-0.3946	-0.0035		-0.4096	0.00162
-0.3944	-0.00391		-0.4094	0.00173
-0.3942	-0.00444		-0.4092	0.00187
-0.394	-0.00613		-0.409	0.00204
-0.3938	-0.00771		-0.4088	0.00108
-0.3936	-0.00919		-0.4086	0.0011
-0.3934	-0.01056		-0.4084	0.000932566
-0.3932	-0.01182		-0.4082	0.00155
-0.393	-0.01298		-0.408	0.00102
-0.3928	-0.01404		-0.4078	-0.000633477
-0.3926	-0.01499		-0.4076	-0.00131
-0.3924	-0.01583		-0.4074	-0.00195
-0.3922	-0.01657		-0.4072	-0.00258
-0.392	-0.0172		-0.407	-0.00318
-0.3918	-0.01773		-0.4068	-0.00375
-0.3916	-0.01815		-0.4066	-0.0043
-0.3914	-0.01847		-0.4064	-0.0027
-0.3912	-0.01765		-0.4062	-0.00223
-0.391	-0.01797		-0.406	-0.00287
-0.3908	-0.01817		-0.4058	-0.00347
-0.3906	-0.01827		-0.4056	-0.00402
-0.3904	-0.01824		-0.4054	-0.00451
-0.3902	-0.01811		-0.4052	-0.00496
-0.39	-0.01786		-0.405	-0.0044
-0.3898	-0.01646		-0.4048	-0.00495
-0.3896	-0.0162		-0.4046	-0.00449
-0.3894	-0.01581		-0.4044	-0.00512
-0.3892	-0.0153		-0.4042	-0.00569
-0.389	-0.01467		-0.404	-0.0062
-0.3888	-0.01391		-0.4038	-0.00664
-0.3886	-0.01303		-0.4036	-0.00702
-0.3884	-0.01203		-0.4034	-0.00733
-0.3882	-0.00987		-0.4032	-0.00757
-0.388	-0.00884		-0.403	-0.00775
-0.3878	-0.00767		-0.4028	-0.00786
-0.3876	-0.00638		-0.4026	-0.00791
-0.3874	-0.00621		-0.4024	-0.0079
-0.3872	-0.00614		-0.4022	-0.00781
-0.387	-0.00618		-0.402	-0.00767
-0.3868	-0.00508		-0.4018	-0.0065
-0.3866	-0.00513		-0.4016	-0.00642
-0.3864	-0.00531		-0.4014	-0.00627
-0.3862	-0.00437		-0.4012	-0.00509
-0.386	-0.00334		-0.401	-0.00615
-0.3858	-0.00223		-0.4008	-0.00619
-0.3856	-0.00228		-0.4006	-0.00615
-0.3854	-0.00248		-0.4004	-0.00604
-0.3852	-0.00283		-0.4002	-0.00703
-0.385	-0.00209		-0.4	-0.00699
-0.3848	-0.00254		-0.3998	-0.00688
-0.3846	-0.00213		-0.3996	-0.00671
-0.3844	-0.0019		-0.3994	-0.00647
-0.3842	-0.00286		-0.3992	-0.00617
-0.384	-0.00401		-0.399	-0.0058
-0.3838	-0.00409		-0.3988	-0.00441
-0.3836	-0.00414		-0.3986	-0.00412
-0.3834	-0.00414		-0.3984	-0.00374
-0.3832	-0.00412		-0.3982	-0.00447
-0.383	-0.00406		-0.398	-0.00533
-0.3828	-0.00396		-0.3978	-0.00518
-0.3826	-0.00383		-0.3976	-0.00497
-0.3824	-0.00366		-0.3974	-0.00471
-0.3822	-0.00346		-0.3972	-0.00439
-0.382	-0.00322		-0.397	-0.00401
-0.3818	-0.00295		-0.3968	-0.00357
-0.3816	-0.00264		-0.3966	-0.00308
-0.3814	-0.0023		-0.3964	-0.00253
-0.3812	-0.00192		-0.3962	-0.00309
-0.381	-0.00276		-0.396	-0.0038
-0.3808	-0.00255		-0.3958	-0.00352
-0.3806	-0.00231		-0.3956	-0.0032
-0.3804	-0.00204		-0.3954	-0.00284
-0.3802	-0.00175		-0.3952	-0.00243
-0.38	-0.00142		-0.395	-0.00199
-0.3798	-0.00108		-0.3948	-0.00267
-0.3796	-0.00196		-0.3946	-0.00332
-0.3794	-0.00179		-0.3944	-0.00395
-0.3792	-0.00161		-0.3942	-0.00455
-0.379	-0.00141		-0.394	-0.00399
-0.3788	-0.00119		-0.3938	-0.00341
-0.3786	-0.000950756		-0.3936	-0.00283
-0.3784	-0.000695849		-0.3934	-0.00224
-0.3782	0.00061033		-0.3932	-0.00164
-0.378	-0.00057279		-0.393	-0.00103
-0.3778	-0.000704639		-0.3928	-0.000414788
-0.3776	-0.000818907		-0.3926	0.000209197
-0.3774	-0.000915596		-0.3924	0.000841336
-0.3772	-0.000994705		-0.3922	0.00148
-0.377	-0.00106		-0.392	0.00213
-0.3768	-0.0011		-0.3918	0.00279
-0.3766	-0.00113		-0.3916	0.00228
-0.3764	-0.00114		-0.3914	0.00274
-0.3762	-0.00113		-0.3912	0.0032
-0.376	-0.0011		-0.391	0.00249
-0.3758	-0.00106		-0.3908	0.00273
-0.3756	-0.000994705		-0.3906	0.00296
-0.3754	-0.000915596		-0.3904	0.00318
-0.3752	0.000214785		-0.3902	0.00436
-0.375	0.000113701		-0.39	0.00533
-0.3748	3.89868e-05		-0.3898	0.00514
-0.3746	-9.35761e-06		-0.3896	0.00495
-0.3744	-0.00129		-0.3894	0.00574
-0.3742	-0.00152		-0.3892	0.00633
-0.374	-0.00173		-0.389	0.00674
-0.3738	-0.00192		-0.3888	0.00697
-0.3736	-0.0021		-0.3886	0.00491
-0.3734	-0.00226		-0.3884	0.00384
-0.3732	-0.0024		-0.3882	0.00281
-0.373	-0.00252		-0.388	0.0018
-0.3728	-0.00263		-0.3878	0.000831745
-0.3726	-0.00271		-0.3876	-0.000106231
-0.3724	-0.00278		-0.3874	-0.00101
-0.3722	-0.00284		-0.3872	-0.00188
-0.372	-0.00287		-0.387	-0.00272
-0.3718	-0.00289		-0.3868	-0.00353
-0.3716	-0.00186		-0.3866	-0.00431
-0.3714	-0.00205		-0.3864	-0.00505
-0.3712	-0.00222		-0.3862	-0.00576
-0.371	-0.00237		-0.386	-0.00644
-0.3708	-0.00249		-0.3858	-0.00708
-0.3706	-0.00258		-0.3856	-0.00769
-0.3704	-0.00265		-0.3854	-0.00827
-0.3702	-0.00269		-0.3852	-0.00882
-0.37	-0.0027		-0.385	-0.00933
-0.3698	-0.00269		-0.3848	-0.00981
-0.3696	-0.00265		-0.3846	-0.01026
-0.3694	-0.00258		-0.3844	-0.00951
-0.3692	-0.00249		-0.3842	-0.00968
-0.369	-0.00237		-0.384	-0.00768
-0.3688	-0.00222		-0.3838	-0.00775
-0.3686	-0.00205		-0.3836	-0.00776
-0.3684	-0.00186		-0.3834	-0.00771
-0.3682	-0.00163		-0.3832	-0.00761
-0.368	-0.00264		-0.383	-0.00745
-0.3678	-0.00259		-0.3828	-0.00724
-0.3676	-0.00253		-0.3826	-0.00696
-0.3674	-0.00245		-0.3824	-0.00663
-0.3672	-0.00339		-0.3822	-0.00625
-0.367	-0.00306		-0.382	-0.0058
-0.3668	-0.00272		-0.3818	-0.00626
-0.3666	-0.00238		-0.3816	-0.0055
-0.3664	-0.00202		-0.3814	-0.00469
-0.3662	-0.00165		-0.3812	-0.00384
-0.366	-0.00128		-0.381	-0.00293
-0.3658	0.000134797		-0.3808	-0.00198
-0.3656	0.000310595		-0.3806	-0.000973588
-0.3654	0.000503973		-0.3804	7.85767e-05
-0.3652	0.00071493		-0.3802	0.00118
-0.365	-0.000314367		-0.38	0.00116
-0.3648	-0.000301182		-0.3798	0.000978259
-0.3646	-0.000279208		-0.3796	0.00179
-0.3644	-0.000248443		-0.3794	0.00263
-0.3642	-0.000208888		-0.3792	0.00233
-0.364	-0.000160544		-0.379	0.00185
-0.3638	-0.00010341		-0.3788	0.00214
-0.3636	-3.74853e-05		-0.3786	0.00203
-0.3634	3.72289e-05		-0.3784	0.00173
-0.3632	0.000120733		-0.3782	0.00145
-0.363	0.000213027		-0.378	0.00118
-0.3628	0.000314111		-0.3778	0.000923735
-0.3626	0.000423984		-0.3776	0.000687213
-0.3624	0.000542648		-0.3774	0.000467001
-0.3622	0.000670102		-0.3772	0.000263101
-0.362	0.000806345		-0.377	7.55118e-05
-0.3618	0.000951378		-0.3768	-9.57664e-05
-0.3616	0.00111		-0.3766	-0.000250734
-0.3614	9.98017e-06		-0.3764	-0.00135
-0.3612	-5.15491e-05		-0.3762	-0.00127
-0.361	-0.000113078		-0.376	-0.00119
-0.3608	-0.000174608		-0.3758	-0.00109
-0.3606	-0.000236137		-0.3756	-0.000989732
-0.3604	-0.000297666		-0.3754	-0.000879607
-0.3602	-0.000359196		-0.3752	0.000197833
-0.36	0.000612967		-0.375	0.00108
-0.3598	0.000336085		-0.3748	0.000826693
-0.3596	6.79935e-05		-0.3746	0.00059425
-0.3594	-0.000191309		-0.3744	0.000386274
-0.3592	-0.000441821		-0.3742	0.000202763
-0.359	-0.000683543		-0.374	4.37187e-05
-0.3588	-0.000916475		-0.3738	-0.00126
-0.3586	-0.00114		-0.3736	-0.00158
-0.3584	-0.00136		-0.3734	-0.00189
-0.3582	-0.00156		-0.3732	-0.00219
-0.358	-0.00176		-0.373	-0.00247
-0.3578	-0.00298		-0.3728	-0.00273
-0.3576	-0.00295		-0.3726	-0.00297
-0.3574	-0.00291		-0.3724	-0.0032
-0.3572	-0.00288		-0.3722	-0.00341
-0.357	-0.00158		-0.372	-0.00361
-0.3568	-0.00132		-0.3718	-0.00283
-0.3566	-0.00104		-0.3716	-0.00202
-0.3564	-0.000753862		-0.3714	-0.00215
-0.3562	-0.0004594		-0.3712	-0.00128
-0.356	-0.000156149		-0.371	-0.00153
-0.3558	0.000155892		-0.3708	-0.00175
-0.3556	-0.000781111		-0.3706	-0.00192
-0.3554	-0.000684422		-0.3704	-0.00206
-0.3552	-0.000587733		-0.3702	-0.00215
-0.355	-0.000491044		-0.37	-0.00221
-0.3548	-0.000394355		-0.3698	-0.00222
-0.3546	-0.000297666		-0.3696	-0.00219
-0.3544	-0.000200977		-0.3694	-0.00116
-0.3542	-0.000104289		-0.3692	-0.00125
-0.354	-7.59963e-06		-0.369	-0.00129
-0.3538	8.90893e-05		-0.3688	-0.00128
-0.3536	0.000185778		-0.3686	-0.00143
-0.3534	0.000282467		-0.3684	-0.00195
-0.3532	0.000379156		-0.3682	-0.00167
-0.353	0.000475845		-0.368	-0.0025
-0.3528	0.000572534		-0.3678	-0.00327
-0.3526	0.000669223		-0.3676	-0.00398
-0.3524	0.000765912		-0.3674	-0.00464
-0.3522	0.0008626		-0.3672	-0.00524
-0.352	0.000959289		-0.367	-0.00482
-0.3518	0.00106		-0.3668	-0.00551
-0.3516	0.00115		-0.3666	-0.00613
-0.3514	0.00125		-0.3664	-0.00668
-0.3512	0.00135		-0.3662	-0.006
-0.351	0.00144		-0.366	-0.00621
-0.3508	0.00154		-0.3658	-0.00635
-0.3506	0.00164		-0.3656	-0.00641
-0.3504	0.00173		-0.3654	-0.00639
-0.3502	0.00183		-0.3652	-0.00631
-0.35	0.00193		-0.365	-0.00732
-0.3498	0.0018		-0.3648	-0.00943
-0.3496	0.00145		-0.3646	-0.01032
-0.3494	0.0011		-0.3644	-0.01001
-0.3492	0.000743937		-0.3642	-0.00965
-0.349	0.000392341		-0.364	-0.01022
-0.3488	4.07448e-05		-0.3638	-0.01054
-0.3486	-0.000310851		-0.3636	-0.00967
-0.3484	-0.000662447		-0.3634	-0.00878
-0.3482	-0.00101		-0.3632	-0.00786
-0.348	-0.00137		-0.363	-0.00692
-0.3478	-0.00172		-0.3628	-0.00691
-0.3476	-0.000810996		-0.3626	-0.00572
-0.3474	0.000104032		-0.3624	-0.00451
-0.3472	-0.000221194		-0.3622	-0.00329
-0.347	-0.000528841		-0.362	-0.00205
-0.3468	-0.000818907		-0.3618	-0.0007928
-0.3466	-0.00109		-0.3616	-0.000687503
-0.3464	-0.00135		-0.3614	0.000385105
-0.3462	-0.00158		-0.3612	0.00147
-0.346	-0.0018		-0.361	0.00139
-0.3458	-0.00201		-0.3608	0.00227
-0.3456	-0.00219		-0.3606	0.00315
-0.3454	-0.00236		-0.3604	0.00307
-0.3452	-0.00147		-0.3602	0.00415
-0.345	-0.00182		-0.36	0.00522
-0.3448	-0.00214		-0.3598	0.00629
-0.3446	-0.00244		-0.3596	0.00735
-0.3444	-0.0027		-0.3594	0.00839
-0.3442	-0.00295		-0.3592	0.00827
-0.344	-0.00316		-0.359	0.00908
-0.3438	-0.00335		-0.3588	0.01084
-0.3436	-0.00351		-0.3586	0.01142
-0.3434	-0.00365		-0.3584	0.01179
-0.3432	-0.00376		-0.3582	0.01077
-0.343	-0.00384		-0.358	0.00953
-0.3428	-0.0039		-0.3578	0.00923
-0.3426	-0.00393		-0.3576	0.0089
-0.3424	-0.00393		-0.3574	0.00854
-0.3422	-0.00391		-0.3572	0.00816
-0.342	-0.00386		-0.357	0.00776
-0.3418	-0.00379		-0.3568	0.00616
-0.3416	-0.00265		-0.3566	0.0055
-0.3414	-0.00274		-0.3564	0.00575
-0.3412	-0.00176		-0.3562	0.00482
-0.341	-0.000960425		-0.356	0.00386
-0.3408	-0.00136		-0.3558	0.00288
-0.3406	-0.00172		-0.3556	0.00187
-0.3404	-0.00202		-0.3554	0.000838274
-0.3402	-0.00123		-0.3552	-0.000218059
-0.34	-0.00164		-0.355	-0.0013
-0.3398	-0.00198		-0.3548	-0.0024
-0.3396	-0.00353		-0.3546	-0.00237
-0.3394	-0.00398		-0.3544	-0.00214
-0.3392	-0.00439		-0.3542	-0.00288
-0.339	-0.00474		-0.354	-0.00362
-0.3388	-0.00504		-0.3538	-0.00321
-0.3386	-0.00425		-0.3536	-0.00259
-0.3384	-0.00466		-0.3534	-0.00292
-0.3382	-0.00501		-0.3532	-0.00324
-0.338	-0.00529		-0.353	-0.00355
-0.3378	-0.00552		-0.3528	-0.00386
-0.3376	-0.00568		-0.3526	-0.00299
-0.3374	-0.00578		-0.3524	-0.00306
-0.3372	-0.00708		-0.3522	-0.00312
-0.337	-0.00729		-0.352	-0.00316
-0.3368	-0.00745		-0.3518	-0.00319
-0.3366	-0.00755		-0.3516	-0.0032
-0.3364	-0.00761		-0.3514	-0.00319
-0.3362	-0.00761		-0.3512	-0.00316
-0.336	-0.00755		-0.351	-0.00312
-0.3358	-0.00745		-0.3508	-0.00306
-0.3356	-0.00729		-0.3506	-0.00299
-0.3354	-0.00708		-0.3504	-0.00194
-0.3352	-0.00681		-0.3502	8.9955e-05
-0.335	-0.00776		-0.35	3.69401e-05
-0.3348	-0.00762		-0.3498	2.47059e-05
-0.3346	-0.00744		-0.3496	5.32524e-05
-0.3344	-0.00722		-0.3494	0.00012258
-0.3342	-0.00695		-0.3492	0.000232687
-0.334	-0.00664		-0.349	0.000383576
-0.3338	-0.00731		-0.3488	0.000575245
-0.3336	-0.0067		-0.3486	-0.000359448
-0.3334	-0.00605		-0.3484	-0.000302355
-0.3332	-0.00536		-0.3482	-0.00138
-0.333	-0.00464		-0.348	-0.00147
-0.3328	-0.00388		-0.3478	-0.00154
-0.3326	-0.00309		-0.3476	-0.00159
-0.3324	-0.00227		-0.3474	-0.00161
-0.3322	-0.00141		-0.3472	-0.0016
-0.332	-0.000509503		-0.347	-0.00158
-0.3318	0.000422226		-0.3468	-0.00152
-0.3316	0.00139		-0.3466	-0.00145
-0.3314	0.00113		-0.3464	-0.00134
-0.3312	0.00194		-0.3462	-0.00238
-0.331	0.00151		-0.346	-0.00341
-0.3308	0.000876664		-0.3458	-0.00326
-0.3306	0.00129		-0.3456	-0.00406
-0.3304	0.00274		-0.3454	-0.00369
-0.3302	0.00295		-0.3452	-0.00332
-0.33	0.00192		-0.345	-0.00296
-0.3298	0.00193		-0.3448	-0.00259
-0.3296	0.00195		-0.3446	-0.00222
-0.3294	0.00198		-0.3444	-0.00186
-0.3292	0.00202		-0.3442	-0.00149
-0.329	0.00311		-0.344	-0.00112
-0.3288	0.00295		-0.3438	-0.000754005
-0.3286	0.00384		-0.3436	-0.000386943
-0.3284	0.00328		-0.3434	-1.98839e-05
-0.3282	0.00252		-0.3432	0.000347173
-0.328	0.00178		-0.343	0.000714227
-0.3278	0.00108		-0.3428	0.00108
-0.3276	0.000394978		-0.3426	0.00145
-0.3274	-0.00025987		-0.3424	0.00182
-0.3272	-0.000888348		-0.3422	0.00218
-0.327	-0.00149		-0.342	0.00255
-0.3268	-0.00207		-0.3418	0.00292
-0.3266	-0.00262		-0.3416	0.00328
-0.3264	-0.0021		-0.3414	0.00365
-0.3262	-0.00282		-0.3412	0.00402
-0.326	-0.00349		-0.341	0.00438
-0.3258	-0.00414		-0.3408	0.00571
-0.3256	-0.00474		-0.3406	0.00588
-0.3254	-0.00531		-0.3404	0.00701
-0.3252	-0.00585		-0.3402	0.00583
-0.325	-0.00635		-0.34	0.00445
-0.3248	-0.00682		-0.3398	0.00402
-0.3246	-0.00725		-0.3396	0.0036
-0.3244	-0.00764		-0.3394	0.00317
-0.3242	-0.008		-0.3392	0.00275
-0.324	-0.00729		-0.339	0.00233
-0.3238	-0.0078		-0.3388	0.0019
-0.3236	-0.007		-0.3386	0.00148
-0.3234	-0.00719		-0.3384	0.00105
-0.3232	-0.00732		-0.3382	0.000628529
-0.323	-0.0074		-0.338	0.00116
-0.3228	-0.00743		-0.3378	0.000539558
-0.3226	-0.0074		-0.3376	-7.62677e-05
-0.3224	-0.00732		-0.3374	-0.00068394
-0.3222	-0.00719		-0.3372	-0.00128
-0.322	-0.007		-0.337	-0.00187
-0.3218	-0.00677		-0.3368	-0.00246
-0.3216	-0.00648		-0.3366	-0.00303
-0.3214	-0.00613		-0.3364	-0.0036
-0.3212	-0.00574		-0.3362	-0.00416
-0.321	-0.00529		-0.336	-0.00471
-0.3208	-0.00479		-0.3358	-0.00408
-0.3206	-0.00423		-0.3356	-0.0044
-0.3204	-0.00363		-0.3354	-0.00354
-0.3202	-0.00423		-0.3352	-0.00361
-0.32	-0.00375		-0.335	-0.00365
-0.3198	-0.00322		-0.3348	-0.00367
-0.3196	-0.00266		-0.3346	-0.00367
-0.3194	-0.00205		-0.3344	-0.00364
-0.3192	-0.00139		-0.3342	-0.00359
-0.319	-0.000693212		-0.334	-0.00255
-0.3188	-0.00121		-0.3338	-0.00265
-0.3186	-0.000654536		-0.3336	-0.00271
-0.3184	-0.00132		-0.3334	-0.00275
-0.3182	-0.00219		-0.3332	-0.00275
-0.318	-0.00201		-0.333	-0.00271
-0.3178	-0.0018		-0.3328	-0.00265
-0.3176	-0.00158		-0.3326	-0.00255
-0.3174	-0.00135		-0.3324	-0.00242
-0.3172	-0.00109		-0.3322	-0.00226
-0.317	-0.000818907		-0.332	-0.00206
-0.3168	-0.000528841		-0.3318	-0.00183
-0.3166	-0.000221194		-0.3316	-0.00157
-0.3164	0.000104032		-0.3314	-0.00224
-0.3162	-0.000810996		-0.3312	-0.00267
-0.316	-0.000683543		-0.331	-0.00192
-0.3158	-0.000547299		-0.3308	-0.00115
-0.3156	-0.000402266		-0.3306	-0.0025
-0.3154	-0.000248443		-0.3304	-0.00267
-0.3152	-8.58297e-05		-0.3302	-0.00286
-0.315	8.55733e-05		-0.33	-0.0021
-0.3148	0.000265766		-0.3298	-0.00136
-0.3146	0.000454749		-0.3296	-0.00062931
-0.3144	0.000652522		-0.3294	8.03617e-05
-0.3142	0.000859084		-0.3292	0.000773716
-0.314	0.00107		-0.329	0.00145
-0.3138	4.07448e-05		-0.3288	0.00211
-0.3136	4.07448e-05		-0.3286	0.00276
-0.3134	4.07448e-05		-0.3284	0.00338
-0.3132	4.07448e-05		-0.3282	0.004
-0.313	4.07448e-05		-0.328	0.00459
-0.3128	4.07448e-05		-0.3278	0.004
-0.3126	4.07448e-05		-0.3276	0.00435
-0.3124	4.07448e-05		-0.3274	0.00467
-0.3122	0.00107		-0.3272	0.00497
-0.312	0.00189		-0.327	0.00524
-0.3118	0.00147		-0.3268	0.00549
-0.3116	0.00107		-0.3266	0.00572
-0.3114	0.00067977		-0.3264	0.00592
-0.3112	0.000310595		-0.3262	0.00609
-0.311	-4.10012e-05		-0.326	0.0072
-0.3108	-0.000375017		-0.3258	0.00713
-0.3106	0.000342238		-0.3256	0.00704
-0.3104	-0.000171971		-0.3254	0.00693
-0.3102	-0.00065981		-0.3252	0.00681
-0.31	-0.00112		-0.325	0.00667
-0.3098	-0.00156		-0.3248	0.00652
-0.3096	-0.00197		-0.3246	0.0073
-0.3094	-0.00235		-0.3244	0.00692
-0.3092	-0.0027		-0.3242	0.00748
-0.309	-0.00303		-0.324	0.00688
-0.3088	-0.00334		-0.3238	0.00511
-0.3086	-0.00361		-0.3236	0.00429
-0.3084	-0.00386		-0.3234	0.00346
-0.3082	-0.00409		-0.3232	0.00262
-0.308	-0.00429		-0.323	0.00178
-0.3078	-0.00446		-0.3228	0.000925499
-0.3076	-0.0046		-0.3226	6.49482e-05
-0.3074	-0.00472		-0.3224	-0.000803763
-0.3072	-0.00481		-0.3222	-0.00168
-0.307	-0.00488		-0.322	-0.00257
-0.3068	-0.00492		-0.3218	-0.00346
-0.3066	-0.00493		-0.3216	-0.00436
-0.3064	-0.00388		-0.3214	-0.00527
-0.3062	-0.00406		-0.3212	-0.00502
-0.306	-0.0042		-0.321	-0.00456
-0.3058	-0.00431		-0.3208	-0.00506
-0.3056	-0.00438		-0.3206	-0.00554
-0.3054	-0.00441		-0.3204	-0.00485
-0.3052	-0.00441		-0.3202	-0.00394
-0.305	-0.00438		-0.32	-0.003
-0.3048	-0.00431		-0.3198	-0.00319
-0.3046	-0.0042		-0.3196	-0.00336
-0.3044	-0.00406		-0.3194	-0.00349
-0.3042	-0.00492		-0.3192	-0.00359
-0.304	-0.00449		-0.319	-0.00365
-0.3038	-0.00404		-0.3188	-0.00368
-0.3036	-0.00356		-0.3186	-0.00368
-0.3034	-0.00409		-0.3184	-0.00269
-0.3032	-0.00334		-0.3182	-0.00283
-0.303	-0.00258		-0.318	-0.00292
-0.3028	-0.00179		-0.3178	-0.00297
-0.3026	-0.000994705		-0.3176	-0.00298
-0.3024	-0.000177245		-0.3174	-0.00296
-0.3022	0.000657796		-0.3172	-0.00289
-0.302	0.000252581		-0.317	-0.00278
-0.3018	-0.000367985		-0.3168	-0.00263
-0.3016	4.51398e-05		-0.3166	-0.00243
-0.3014	0.000458265		-0.3164	-0.0022
-0.3012	0.00087139		-0.3162	-0.00193
-0.301	0.00128		-0.316	-0.00161
-0.3008	0.0017		-0.3158	-0.00243
-0.3006	0.00211		-0.3156	-0.00225
-0.3004	0.00127		-0.3154	-0.00204
-0.3002	0.00145		-0.3152	-0.00179
-0.3	0.00162		-0.315	-0.00151
-0.2998	0.00178		-0.3148	-0.0012
-0.2996	0.00193		-0.3146	-0.00086105
-0.2994	0.00208		-0.3144	-0.00261
-0.2992	0.00222		-0.3142	-0.00222
-0.299	0.00234		-0.314	-0.00298
-0.2988	0.00246		-0.3138	-0.00277
-0.2986	0.00257		-0.3136	-0.00256
-0.2984	0.00267		-0.3134	-0.00233
-0.2982	0.00276		-0.3132	-0.0021
-0.298	0.00285		-0.313	-0.00186
-0.2978	0.00292		-0.3128	-0.00161
-0.2976	0.00299		-0.3126	-0.00231
-0.2974	0.00305		-0.3124	-0.00281
-0.2972	0.00309		-0.3122	-0.0031
-0.297	0.00313		-0.312	-0.00224
-0.2968	0.00316		-0.3118	-0.0014
-0.2966	0.00319		-0.3116	-0.00058041
-0.2964	0.0032		-0.3114	0.000227135
-0.2962	0.00195		-0.3112	0.00102
-0.296	0.00171		-0.311	0.00179
-0.2958	0.00145		-0.3108	0.00255
-0.2956	0.00118		-0.3106	0.00329
-0.2954	0.000891607		-0.3104	0.00402
-0.2952	0.000583961		-0.3102	0.00473
-0.295	0.000258734		-0.31	0.00542
-0.2948	-8.40718e-05		-0.3098	0.00493
-0.2946	-0.000444458		-0.3096	0.00538
-0.2944	-0.000822423		-0.3094	0.0058
-0.2942	-0.00122		-0.3092	0.00619
-0.294	-0.000373259		-0.309	0.00656
-0.2938	-0.000571032		-0.3088	0.00691
-0.2936	-0.000777595		-0.3086	0.00723
-0.2934	-0.000992947		-0.3084	0.00849
-0.2932	4.07448e-05		-0.3082	0.00836
-0.293	4.07448e-05		-0.308	0.00896
-0.2928	4.07448e-05		-0.3078	0.00838
-0.2926	0.00107		-0.3076	0.0078
-0.2924	0.000859084		-0.3074	0.00721
-0.2922	0.000652522		-0.3072	0.00661
-0.292	0.00149		-0.307	0.006
-0.2918	0.00108		-0.3068	0.00538
-0.2916	0.00069735		-0.3066	0.00476
-0.2914	0.000328175		-0.3064	0.00413
-0.2912	-2.34214e-05		-0.3062	0.00445
-0.291	-0.000357438		-0.306	0.0036
-0.2908	-0.000673874		-0.3058	0.00371
-0.2906	-0.000972731		-0.3056	0.00362
-0.2904	-0.00125		-0.3054	0.00238
-0.2902	-0.00152		-0.3052	0.00116
-0.29	-0.00176		-0.305	-5.07539e-05
-0.2898	-0.00199		-0.3048	-0.00124
-0.2896	-0.0022		-0.3046	-0.00242
-0.2894	-0.0024		-0.3044	-0.00357
-0.2892	-0.00154		-0.3042	-0.00355
-0.289	-0.00191		-0.304	-0.00446
-0.2888	-0.00226		-0.3038	-0.00534
-0.2886	-0.00258		-0.3036	-0.0062
-0.2884	-0.00287		-0.3034	-0.00704
-0.2882	-0.00314		-0.3032	-0.00785
-0.288	-0.00338		-0.303	-0.00864
-0.2878	-0.0036		-0.3028	-0.0094
-0.2876	-0.00379		-0.3026	-0.00918
-0.2874	-0.00395		-0.3024	-0.00893
-0.2872	-0.00409		-0.3022	-0.00747
-0.287	-0.0042		-0.302	-0.00691
-0.2868	-0.00428		-0.3018	-0.00724
-0.2866	-0.00434		-0.3016	-0.00751
-0.2864	-0.00437		-0.3014	-0.00771
-0.2862	-0.00437		-0.3012	-0.00785
-0.286	-0.00435		-0.301	-0.00793
-0.2858	-0.0043		-0.3008	-0.00793
-0.2856	-0.00423		-0.3006	-0.00788
-0.2854	-0.00413		-0.3004	-0.00679
-0.2852	-0.004		-0.3002	-0.00585
-0.285	-0.00385		-0.3	-0.00599
-0.2848	-0.00367		-0.2998	-0.00604
-0.2846	-0.00346		-0.2996	-0.00602
-0.2844	-0.00323		-0.2994	-0.00591
-0.2842	-0.00297		-0.2992	-0.00573
-0.284	-0.00268		-0.299	-0.00546
-0.2838	-0.00237		-0.2988	-0.00511
-0.2836	-0.000997342		-0.2986	-0.00467
-0.2834	0.000185778		-0.2984	-0.00416
-0.2832	0.000155014		-0.2982	-0.00473
-0.283	0.000168198		-0.298	-0.00544
-0.2828	0.000225333		-0.2978	-0.00629
-0.2826	0.000326417		-0.2976	-0.00612
-0.2824	-0.000786385		-0.2974	-0.0059
-0.2822	-0.000830334		-0.2972	-0.00561
-0.282	-0.000839124		-0.297	-0.00528
-0.2818	-0.00207		-0.2968	-0.00392
-0.2816	-0.00224		-0.2966	-0.00367
-0.2814	-0.00239		-0.2964	-0.00335
-0.2812	-0.00251		-0.2962	-0.00297
-0.281	-0.0026		-0.296	-0.00368
-0.2808	-0.00266		-0.2958	-0.00339
-0.2806	-0.0027		-0.2956	-0.0042
-0.2804	-0.00272		-0.2954	-0.00517
-0.2802	-0.0027		-0.2952	-0.00514
-0.28	-0.00266		-0.295	-0.00507
-0.2798	-0.0026		-0.2948	-0.00496
-0.2796	-0.00251		-0.2946	-0.00481
-0.2794	-0.00239		-0.2944	-0.00462
-0.2792	-0.00224		-0.2942	-0.00439
-0.279	-0.00333		-0.294	-0.00411
-0.2788	-0.00336		-0.2938	-0.00476
-0.2786	-0.00338		-0.2936	-0.00421
-0.2784	-0.00338		-0.2934	-0.00362
-0.2782	-0.00336		-0.2932	-0.00204
-0.278	-0.00333		-0.293	-0.00159
-0.2778	-0.00328		-0.2928	-0.00109
-0.2776	-0.00321		-0.2926	-0.00055844
-0.2774	-0.00312		-0.2924	-0.00115
-0.2772	-0.00198		-0.2922	-0.000750881
-0.277	-0.00207		-0.292	-0.00149
-0.2768	-0.00214		-0.2918	-0.00124
-0.2766	-0.00218		-0.2916	-0.000963699
-0.2764	-0.00219		-0.2914	-0.000665984
-0.2762	-0.00218		-0.2912	-0.000343801
-0.276	-0.00214		-0.291	2.84878e-06
-0.2758	-0.00207		-0.2908	0.000373966
-0.2756	-0.00198		-0.2906	0.00076955
-0.2754	-0.00186		-0.2904	0.00119
-0.2752	-0.00171		-0.2902	0.000466977
-0.275	-0.00154		-0.29	-0.000447318
-0.2748	-0.00135		-0.2898	-0.000394296
-0.2746	-0.00112		-0.2896	0.000626042
-0.2744	-0.000870768		-0.2894	0.000495548
-0.2742	-0.000593886		-0.2892	0.000381365
-0.274	0.000743058		-0.289	0.000283493
-0.2738	0.000857326		-0.2888	0.000201933
-0.2736	0.00204		-0.2886	0.000136683
-0.2734	0.000751848		-0.2884	8.77442e-05
-0.2732	0.000307958		-0.2882	5.51166e-05
-0.273	-0.000324915		-0.288	3.88e-05
-0.2728	-0.000922628		-0.2878	3.87945e-05
-0.2726	-0.00149		-0.2876	0.00101
-0.2724	-0.00201		-0.2874	0.000847053
-0.2722	-0.0025		-0.2872	0.000704311
-0.272	-0.00296		-0.287	0.000586037
-0.2718	-0.00338		-0.2868	0.00049223
-0.2716	-0.00377		-0.2866	-0.000744253
-0.2714	-0.00412		-0.2864	-0.00101
-0.2712	-0.00444		-0.2862	-0.00125
-0.271	-0.00472		-0.286	-0.00148
-0.2708	-0.00497		-0.2858	-0.00169
-0.2706	-0.00518		-0.2856	-0.00189
-0.2704	-0.00535		-0.2854	-0.00207
-0.2702	-0.00549		-0.2852	-0.00223
-0.27	-0.0056		-0.285	-0.00238
-0.2698	-0.00567		-0.2848	-0.00251
-0.2696	-0.0057		-0.2846	-0.00262
-0.2694	-0.0057		-0.2844	-0.00272
-0.2692	-0.00567		-0.2842	-0.00376
-0.269	-0.0056		-0.284	-0.00458
-0.2688	-0.00549		-0.2838	-0.00424
-0.2686	-0.00535		-0.2836	-0.00273
-0.2684	-0.00518		-0.2834	-0.00217
-0.2682	-0.00497		-0.2832	-0.00257
-0.268	-0.00472		-0.283	-0.00296
-0.2678	-0.00444		-0.2828	-0.0024
-0.2676	-0.00412		-0.2826	-0.00185
-0.2674	-0.00377		-0.2824	-0.00131
-0.2672	-0.00338		-0.2822	-0.000771157
-0.267	-0.00525		-0.282	-0.000245025
-0.2668	-0.00481		-0.2818	0.000272946
-0.2666	-0.00436		-0.2816	0.000782758
-0.2664	-0.00388		-0.2814	0.00128
-0.2662	-0.00339		-0.2812	0.00178
-0.266	-0.00288		-0.281	0.00226
-0.2658	-0.00235		-0.2808	0.00178
-0.2656	-0.00181		-0.2806	0.00149
-0.2654	-0.00125		-0.2804	0.00138
-0.2652	-0.000665084		-0.2802	0.00241
-0.265	-6.73709e-05		-0.28	0.00341
-0.2648	0.000547922		-0.2798	0.00437
-0.2646	0.00118		-0.2796	0.0053
-0.2644	0.00183		-0.2794	0.00503
-0.2642	0.0025		-0.2792	0.00472
-0.264	0.00318		-0.279	0.00553
-0.2638	0.00263		-0.2788	0.00628
-0.2636	0.00312		-0.2786	0.00699
-0.2634	0.00236		-0.2784	0.00765
-0.2632	0.00263		-0.2782	0.00827
-0.263	0.00164		-0.278	0.00883
-0.2628	0.00168		-0.2778	0.00934
-0.2626	0.00171		-0.2776	0.00981
-0.2624	0.00174		-0.2774	0.00906
-0.2622	0.00175		-0.2772	0.00921
-0.262	0.00175		-0.277	0.0093
-0.2618	0.00175		-0.2768	0.00934
-0.2616	0.00174		-0.2766	0.00932
-0.2614	0.00171		-0.2764	0.00924
-0.2612	0.00168		-0.2762	0.00911
-0.261	0.00164		-0.276	0.00891
-0.2608	0.0016		-0.2758	0.00867
-0.2606	0.00154		-0.2756	0.00836
-0.2604	0.00147		-0.2754	0.008
-0.2602	0.0014		-0.2752	0.00758
-0.26	0.00131		-0.275	0.0071
-0.2598	0.00122		-0.2748	0.00657
-0.2596	0.00112		-0.2746	0.00597
-0.2594	0.00101		-0.2744	0.00533
-0.2592	0.000892486		-0.2742	0.00462
-0.259	0.000765033		-0.274	0.00598
-0.2588	0.000628789		-0.2738	0.00635
-0.2586	0.000483756		-0.2736	0.00572
-0.2584	0.000329933		-0.2734	0.00506
-0.2582	0.000167319		-0.2732	0.00437
-0.258	-4.08367e-06		-0.273	0.00481
-0.2578	-0.000184277		-0.2728	0.00426
-0.2576	-0.000373259		-0.2726	0.0037
-0.2574	-0.000571032		-0.2724	0.00311
-0.2572	-0.000777595		-0.2722	0.00249
-0.257	-0.000992947		-0.272	0.00185
-0.2568	4.07448e-05		-0.2718	0.00118
-0.2566	4.07448e-05		-0.2716	0.00049543
-0.2564	4.07448e-05		-0.2714	-0.000218324
-0.2562	-0.000992947		-0.2712	-0.000956551
-0.256	-0.000777595		-0.271	-0.00172
-0.2558	-0.000571032		-0.2708	-0.00251
-0.2556	-0.000373259		-0.2706	-0.00215
-0.2554	-0.000184277		-0.2704	-0.0016
-0.2552	-4.08367e-06		-0.2702	-0.000856163
-0.255	0.000167319		-0.27	-0.00107
-0.2548	0.000329933		-0.2698	-0.00128
-0.2546	0.000483756		-0.2696	-0.00149
-0.2544	0.000628789		-0.2694	-0.0017
-0.2542	0.000765033		-0.2692	-0.00192
-0.254	0.000892486		-0.269	-0.000961371
-0.2538	0.00101		-0.2688	-0.000957293
-0.2536	0.00112		-0.2686	-0.000945059
-0.2534	0.00122		-0.2684	-0.000924668
-0.2532	0.00131		-0.2682	6.30397e-05
-0.253	0.0014		-0.268	-0.000100083
-0.2528	0.00147		-0.2678	-0.000246893
-0.2526	0.00257		-0.2676	0.00058177
-0.2524	0.00241		-0.2674	0.00123
-0.2522	0.00226		-0.2672	0.0017
-0.252	0.0021		-0.267	0.002
-0.2518	0.00194		-0.2668	0.00118
-0.2516	0.00178		-0.2666	0.000417016
-0.2514	0.00162		-0.2664	-0.000300724
-0.2512	0.00146		-0.2662	-0.000969527
-0.251	0.00131		-0.266	-0.00159
-0.2508	0.00115		-0.2658	-0.00216
-0.2506	-4.36382e-05		-0.2656	-0.00268
-0.2504	-0.00102		-0.2654	-0.00316
-0.2502	-0.000756499		-0.2652	-0.00358
-0.25	-0.000510382		-0.265	-0.00395
-0.2498	-0.000281844		-0.2648	-0.00428
-0.2496	-7.08869e-05		-0.2646	-0.00552
-0.2494	0.000122491		-0.2644	-0.00651
-0.2492	0.000298289		-0.2642	-0.00629
-0.249	0.000456507		-0.264	-0.00701
-0.2488	0.000597145		-0.2638	-0.0077
-0.2486	0.000720204		-0.2636	-0.00741
-0.2484	0.000825683		-0.2634	-0.00711
-0.2482	0.000913582		-0.2632	-0.00775
-0.248	0.000983901		-0.263	-0.00722
-0.2478	0.00104		-0.2628	-0.00667
-0.2476	0.00107		-0.2626	-0.00708
-0.2474	0.00109		-0.2624	-0.00632
-0.2472	0.00109		-0.2622	-0.00557
-0.247	0.00107		-0.262	-0.00481
-0.2468	0.00104		-0.2618	-0.00405
-0.2466	0.000983901		-0.2616	-0.00329
-0.2464	0.000913582		-0.2614	-0.00253
-0.2462	0.000825683		-0.2612	-0.00273
-0.246	0.00198		-0.261	-0.00177
-0.2458	0.00209		-0.2608	-0.000823602
-0.2456	0.00219		-0.2606	0.000118518
-0.2454	0.00228		-0.2604	0.00105
-0.2452	0.00236		-0.2602	0.00198
-0.245	0.00244		-0.26	0.0029
-0.2448	0.00251		-0.2598	0.00381
-0.2446	0.00256		-0.2596	0.00471
-0.2444	0.00261		-0.2594	0.0056
-0.2442	0.00265		-0.2592	0.00648
-0.244	0.00268		-0.259	0.00736
-0.2438	0.00374		-0.2588	0.00823
-0.2436	0.00353		-0.2586	0.00909
-0.2434	0.00333		-0.2584	0.00994
-0.2432	0.00313		-0.2582	0.01079
-0.243	0.00293		-0.258	0.01046
-0.2428	0.00273		-0.2578	0.01107
-0.2426	0.00252		-0.2576	0.01166
-0.2424	0.00106		-0.2574	0.01108
-0.2422	0.000628789		-0.2572	0.01025
-0.242	0.000184899		-0.257	0.00919
-0.2418	-0.000267781		-0.2568	0.00884
-0.2416	-0.00072925		-0.2566	0.00824
-0.2414	-0.0012		-0.2564	0.0076
-0.2412	-0.00168		-0.2562	0.00788
-0.241	-0.00217		-0.256	0.00792
-0.2408	-0.00266		-0.2558	0.00772
-0.2406	-0.00317		-0.2556	0.0073
-0.2404	-0.00242		-0.2554	0.00571
-0.2402	-0.00146		-0.2552	0.00411
-0.24	-0.00151		-0.255	0.0025
-0.2398	-0.00156		-0.2548	0.00184
-0.2396	-0.0016		-0.2546	8.41859e-06
-0.2394	-0.00163		-0.2544	-0.000651378
-0.2392	-0.00165		-0.2542	-0.0011
-0.239	-0.00167		-0.254	-0.00248
-0.2388	-0.00167		-0.2538	-0.00268
-0.2386	-0.00167		-0.2536	-0.00382
-0.2384	-0.000621135		-0.2534	-0.00494
-0.2382	-0.000814512		-0.2532	-0.00602
-0.238	-0.00099031		-0.253	-0.00592
-0.2378	-0.00115		-0.2528	-0.00675
-0.2376	-0.00129		-0.2526	-0.00658
-0.2374	-0.00141		-0.2524	-0.00637
-0.2372	-0.00152		-0.2522	-0.00611
-0.237	-0.00161		-0.252	-0.006
-0.2368	-0.00168		-0.2518	-0.00604
-0.2366	-0.00173		-0.2516	-0.00717
-0.2364	-0.00176		-0.2514	-0.00823
-0.2362	-0.00178		-0.2512	-0.00921
-0.236	-0.00178		-0.251	-0.00895
-0.2358	-0.00176		-0.2508	-0.00957
-0.2356	-0.00173		-0.2506	-0.00915
-0.2354	-0.00168		-0.2504	-0.00885
-0.2352	-0.00161		-0.2502	-0.00866
-0.235	-0.00152		-0.25	-0.00952
-0.2348	-0.00245		-0.2498	-0.01029
-0.2346	-0.00211		-0.2496	-0.01094
-0.2344	-0.00176		-0.2494	-0.01149
-0.2342	-0.0014		-0.2492	-0.01098
-0.234	-0.00104		-0.249	-0.01152
-0.2338	-0.000665963		-0.2488	-0.01194
-0.2336	-0.00154		-0.2486	-0.01225
-0.2334	-0.00138		-0.2484	-0.01245
-0.2332	-0.00123		-0.2482	-0.01253
-0.233	-0.00107		-0.248	-0.0125
-0.2328	-0.000908564		-0.2478	-0.01235
-0.2326	-0.000750346		-0.2476	-0.01209
-0.2324	-0.000592128		-0.2474	-0.01171
-0.2322	-0.00043391		-0.2472	-0.01122
-0.232	-0.000275692		-0.247	-0.01062
-0.2318	-0.000117473		-0.2468	-0.0099
-0.2316	4.07448e-05		-0.2466	-0.01024
-0.2314	0.000198963		-0.2464	-0.00855
-0.2312	0.000357181		-0.2462	-0.00791
-0.231	0.000515399		-0.246	-0.00833
-0.2308	0.000673618		-0.2458	-0.00885
-0.2306	0.000831836		-0.2456	-0.00948
-0.2304	0.000990054		-0.2454	-0.01022
-0.2302	0.00115		-0.2452	-0.00993
-0.23	0.00131		-0.245	-0.00955
-0.2298	0.0025		-0.2448	-0.0091
-0.2296	0.00244		-0.2446	-0.00973
-0.2294	0.00239		-0.2444	-0.00932
-0.2292	0.00339		-0.2442	-0.00885
-0.229	0.00417		-0.244	-0.0083
-0.2288	0.00373		-0.2438	-0.00767
-0.2286	0.00331		-0.2436	-0.00697
-0.2284	0.00396		-0.2434	-0.0062
-0.2282	0.00212		-0.2432	-0.00536
-0.228	0.00134		-0.243	-0.00444
-0.2278	0.000588356		-0.2428	-0.00345
-0.2276	-0.000136811		-0.2426	-0.00239
-0.2274	-0.000835608		-0.2424	-0.00242
-0.2272	-0.00151		-0.2422	-0.00142
-0.227	-0.00112		-0.242	-0.00153
-0.2268	-0.00196		-0.2418	-0.00179
-0.2266	-0.00276		-0.2416	-0.0022
-0.2264	-0.00352		-0.2414	-0.00162
-0.2262	-0.00425		-0.2412	-0.000994811
-0.226	-0.00494		-0.241	-0.000330086
-0.2258	-0.0056		-0.2408	0.00037542
-0.2256	-0.00623		-0.2406	0.00112
-0.2254	-0.00682		-0.2404	0.00074163
-0.2252	-0.00737		-0.2402	0.000186197
-0.225	-0.00789		-0.24	-0.000552749
-0.2248	-0.00837		-0.2398	0.000642941
-0.2246	-0.00756		-0.2396	0.000695956
-0.2244	-0.00774		-0.2394	0.00173
-0.2242	-0.00788		-0.2392	0.00163
-0.224	-0.00797		-0.239	0.000402335
-0.2238	-0.00802		-0.2388	0.000153573
-0.2236	-0.00802		-0.2386	-7.07209e-05
-0.2234	-0.00798		-0.2384	-0.000270546
-0.2232	-0.00687		-0.2382	-0.000445903
-0.223	-0.00696		-0.238	-0.000596792
-0.2228	-0.00802		-0.2378	-0.000723212
-0.2226	-0.00779		-0.2376	-0.000825163
-0.2224	-0.00751		-0.2374	-0.000902647
-0.2222	-0.00719		-0.2372	-0.000955662
-0.222	-0.00683		-0.237	-0.000984208
-0.2218	-0.00642		-0.2368	-0.000988286
-0.2216	-0.00597		-0.2366	-8.73425e-06
-0.2214	-0.00547		-0.2364	0.000795461
-0.2212	-0.00596		-0.2362	-0.00069385
-0.221	-0.0062		-0.236	-0.00119
-0.2208	-0.00515		-0.2358	-0.00166
-0.2206	-0.00407		-0.2356	-0.00209
[truncated: 28,678 more rows]

## Sheet: Figure 2e
material	|Sm|	Em	k33	Em/E
	%	J cm-3		J m-2 V-1
PZT	0.1	0.32	0.7	0.128
PZN-PT	1.7	1.11	0.9	0.093
P(VDF-TrFE)/CuPc	1.91	0.14	0.64	0.011
Irradiated P(VDF-TrFE)	4	0.3	0.3	0.002
P(VDF-TrFE-CTFE)	4	0.32	0.28	0.002
P(VDF-TrFE-CFE-FA)	5.8	0.38	0.88	0.005
Our work	8.1	11.32	0.88	0.283
